# Supplementary material for: Chikungunya virus time course infection of human macrophages reveals intracellular signaling pathways relevant to repurposed therapeutics
Source: PeerJ. 2022 Mar 21;10:e13090. doi: 10.7717/peerj.13090 (PMC8944338; doi:10.7717/peerj.13090)
Supplement: Supplemental Information 1 [file peerj-10-13090-s001.xlsx]

## Sheet: DEGs
seqnames	start	end	width	strand	gene_id	gene_name	entrezid	gene_biotype	seq_coord_system	symbol	logFC	logCPM	F	PValue	FDR	mlog10PValue
7	103000000	103000000	43000	-	ENSG00000105808	RASA4	NA	protein_coding	NA	RASA4	-13.6	6.85	213	1.05e-05	0.00938	4.98
1	201000000	201000000	38100	+	ENSG00000163395	IGFN1	NA	protein_coding	NA	IGFN1	-16.8	8.98	155	2.48e-05	0.00938	4.6
1	228000000	228000000	171000	+	ENSG00000154358	OBSCN	NA	protein_coding	NA	OBSCN	-18	8.73	250	3.14e-05	0.00938	4.5
18	47000000	47000000	1880	-	ENSG00000183791	ELOA3	NA	protein_coding	NA	ELOA3	-16.8	9.82	141	3.27e-05	0.00938	4.49
5	141000000	141000000	137000	+	ENSG00000251664	PCDHA12	NA	protein_coding	NA	PCDHA12	-11.2	6.16	141	3.27e-05	0.00938	4.49
7	101000000	101000000	18800	+	ENSG00000169894	MUC3A	NA	protein_coding	NA	MUC3A	-17.4	8.17	241	3.43e-05	0.00938	4.46
13	57100000	57100000	3020	+	ENSG00000204919	PRR20A	NA	protein_coding	NA	PRR20A	-18.5	9.25	238	3.52e-05	0.00938	4.45
19	8850000	8980000	132000	-	ENSG00000181143	MUC16	NA	protein_coding	NA	MUC16	-17.7	8.61	238	3.53e-05	0.00938	4.45
16	21400000	21400000	46300	-	ENSG00000169246	NPIPB3	NA	protein_coding	NA	NPIPB3	-17	8.1	231	3.76e-05	0.00938	4.42
7	101000000	101000000	49300	+	ENSG00000205277	MUC12	NA	protein_coding	NA	MUC12	-20.1	10.7	230	3.8e-05	0.00938	4.42
2	3580000	3580000	5660	+	ENSG00000171863	RPS7	NA	protein_coding	NA	RPS7	9.93	11.8	129	4.14e-05	0.00938	4.38
12	76000000	76100000	48400	-	ENSG00000187109	NAP1L1	NA	protein_coding	NA	NAP1L1	10.4	10.8	128	4.19e-05	0.00938	4.38
11	1220000	1260000	39100	+	ENSG00000117983	MUC5B	NA	protein_coding	NA	MUC5B	-17.1	8.13	220	4.22e-05	0.00938	4.37
7	101000000	101000000	64200	+	ENSG00000146839	ZAN	NA	protein_coding	NA	ZAN	-17	7.87	218	4.3e-05	0.00938	4.37
6	30700000	30700000	5080	+	ENSG00000196230	TUBB	NA	protein_coding	NA	TUBB	18.6	9.25	211	4.63e-05	0.00938	4.33
6	161000000	161000000	133000	-	ENSG00000198670	LPA	NA	protein_coding	NA	LPA	-16.9	8.64	209	4.72e-05	0.00938	4.33
14	105000000	105000000	41100	-	ENSG00000185567	AHNAK2	NA	protein_coding	NA	AHNAK2	-17	8.03	205	4.92e-05	0.00938	4.31
15	41800000	41900000	45900	-	ENSG00000137877	SPTBN5	NA	protein_coding	NA	SPTBN5	-16.3	7.25	205	4.96e-05	0.00938	4.3
3	48600000	48600000	31200	-	ENSG00000114270	COL7A1	NA	protein_coding	NA	COL7A1	-17.1	7.6	203	5.04e-05	0.00938	4.3
7	94400000	94400000	36700	+	ENSG00000164692	COL1A2	NA	protein_coding	NA	COL1A2	-12	5.47	119	5.16e-05	0.00938	4.29
13	103000000	103000000	29700	-	ENSG00000175820	CCDC168	NA	protein_coding	NA	CCDC168	-16	7.44	200	5.23e-05	0.00938	4.28
6	35500000	35500000	15000	-	ENSG00000112041	TULP1	NA	protein_coding	NA	TULP1	-16.7	7.73	197	5.39e-05	0.00938	4.27
7	100000000	100000000	14500	+	ENSG00000214300	SPDYE3	NA	protein_coding	NA	SPDYE3	-16.5	7.28	196	5.49e-05	0.00938	4.26
15	75700000	75700000	38500	-	ENSG00000173546	CSPG4	NA	protein_coding	NA	CSPG4	-16.1	6.97	196	5.51e-05	0.00938	4.26
6	106000000	107000000	211000	+	ENSG00000112297	CRYBG1	NA	protein_coding	NA	CRYBG1	-16.3	6.99	195	5.55e-05	0.00938	4.26
7	103000000	103000000	11100	+	ENSG00000205238	SPDYE2	NA	protein_coding	NA	SPDYE2	-15.8	7.16	195	5.57e-05	0.00938	4.25
6	35600000	35700000	155000	-	ENSG00000096060	FKBP5	NA	protein_coding	NA	FKBP5	-14.5	8.34	116	5.58e-05	0.00938	4.25
1	21800000	21900000	115000	-	ENSG00000142798	HSPG2	NA	protein_coding	NA	HSPG2	-16.7	7.49	193	5.66e-05	0.00938	4.25
8	130000000	130000000	178000	-	ENSG00000153310	FAM49B	NA	protein_coding	NA	FAM49B	8.89	8.84	113	5.89e-05	0.00938	4.23
14	77500000	77500000	11600	+	ENSG00000100591	AHSA1	NA	protein_coding	NA	AHSA1	8.46	9.72	113	5.91e-05	0.00938	4.23
13	98100000	98500000	313000	+	ENSG00000152767	FARP1	NA	protein_coding	NA	FARP1	-14.1	5.36	113	5.94e-05	0.00938	4.23
16	29500000	29500000	22400	-	ENSG00000169203	NPIPB12	NA	protein_coding	NA	NPIPB12	-18.7	9.7	189	5.94e-05	0.00938	4.23
2	167000000	167000000	371000	+	ENSG00000163092	XIRP2	NA	protein_coding	NA	XIRP2	-15.6	7.21	189	5.97e-05	0.00938	4.22
15	84200000	84200000	9600	+	ENSG00000184206	GOLGA6L4	NA	protein_coding	NA	GOLGA6L4	-16.1	6.77	187	6.14e-05	0.00938	4.21
8	109000000	109000000	11600	+	ENSG00000120533	ENY2	NA	protein_coding	NA	ENY2	8.86	9.46	111	6.16e-05	0.00938	4.21
1	21500000	21500000	327	-	ENSG00000176378	PFN1P10	NA	processed_pseudogene	NA	PFN1P10	17.2	9.02	186	6.17e-05	0.00938	4.21
5	123000000	123000000	59500	+	ENSG00000205302	SNX2	NA	protein_coding	NA	SNX2	7.35	8.54	111	6.19e-05	0.00938	4.21
2	21000000	21000000	42600	-	ENSG00000084674	APOB	NA	protein_coding	NA	APOB	-15.4	7.04	185	6.28e-05	0.00938	4.2
2	97100000	97300000	151000	+	ENSG00000135976	ANKRD36	NA	protein_coding	NA	ANKRD36	-16.1	7.54	185	6.28e-05	0.00938	4.2
2	63600000	63600000	18600	+	ENSG00000014641	MDH1	NA	protein_coding	NA	MDH1	7.79	9.29	111	6.29e-05	0.00938	4.2
8	66700000	66900000	194000	+	ENSG00000104205	SGK3	NA	protein_coding	NA	SGK3	7.31	8.8	111	6.29e-05	0.00938	4.2
20	3230000	3240000	12100	-	ENSG00000088836	SLC4A11	NA	protein_coding	NA	SLC4A11	-15.9	6.62	184	6.3e-05	0.00938	4.2
2	172000000	173000000	79100	+	ENSG00000091409	ITGA6	NA	protein_coding	NA	ITGA6	-17.1	8.52	184	6.3e-05	0.00938	4.2
2	175000000	175000000	8350	-	ENSG00000154518	ATP5MC3	NA	protein_coding	NA	ATP5MC3	8.87	11.5	110	6.32e-05	0.00938	4.2
9	65700000	65700000	65200	+	ENSG00000147996	CBWD5	NA	protein_coding	NA	CBWD5	-13.2	7.31	110	6.34e-05	0.00938	4.2
20	3670000	3680000	14300	-	ENSG00000149451	ADAM33	NA	protein_coding	NA	ADAM33	-16.1	6.96	183	6.4e-05	0.00938	4.19
1	170000000	170000000	74600	-	ENSG00000198734	F5	NA	protein_coding	NA	F5	-15.7	6.97	182	6.46e-05	0.00938	4.19
3	49700000	49700000	5560	-	ENSG00000173531	MST1	NA	protein_coding	NA	MST1	-16	7.27	181	6.56e-05	0.00938	4.18
2	224000000	225000000	115000	-	ENSG00000036257	CUL3	NA	protein_coding	NA	CUL3	8.06	10.7	108	6.67e-05	0.00938	4.18
16	21800000	21900000	46300	-	ENSG00000185864	NPIPB4	NA	protein_coding	NA	NPIPB4	-16.1	7.22	180	6.69e-05	0.00938	4.17
7	145000000	145000000	1390	-	ENSG00000243746	EEF1A1P10	NA	processed_pseudogene	NA	EEF1A1P10	10.7	9.92	108	6.71e-05	0.00938	4.17
3	159000000	159000000	97500	+	ENSG00000118855	MFSD1	NA	protein_coding	NA	MFSD1	8.01	9.68	107	6.8e-05	0.00938	4.17
3	36800000	36900000	118000	-	ENSG00000168016	TRANK1	NA	protein_coding	NA	TRANK1	-15.7	7.07	178	6.81e-05	0.00938	4.17
7	101000000	101000000	38800	+	ENSG00000169876	MUC17	NA	protein_coding	NA	MUC17	-16.8	7.52	176	7.02e-05	0.00938	4.15
2	112000000	112000000	66100	-	ENSG00000169629	RGPD8	NA	protein_coding	NA	RGPD8	-12.1	7.92	105	7.25e-05	0.00938	4.14
14	96500000	96600000	65700	+	ENSG00000090060	PAPOLA	NA	protein_coding	NA	PAPOLA	8	10.6	105	7.26e-05	0.00938	4.14
11	103000000	103000000	41500	-	ENSG00000137692	DCUN1D5	NA	protein_coding	NA	DCUN1D5	8.38	8.91	105	7.27e-05	0.00938	4.14
2	128000000	128000000	102000	+	ENSG00000169994	MYO7B	NA	protein_coding	NA	MYO7B	-15.8	6.42	173	7.29e-05	0.00938	4.14
16	30200000	30300000	31600	-	ENSG00000198064	NPIPB13	NA	protein_coding	NA	NPIPB13	-15.2	7.01	173	7.3e-05	0.00938	4.14
13	25300000	25300000	48200	+	ENSG00000139496	NUP58	NA	protein_coding	NA	NUP58	7.17	9.19	105	7.31e-05	0.00938	4.14
6	35900000	36000000	81400	-	ENSG00000112053	SLC26A8	NA	protein_coding	NA	SLC26A8	-15.2	6.91	172	7.4e-05	0.00938	4.13
9	61200000	61200000	6280	+	ENSG00000276040	SPATA31A7	NA	protein_coding	NA	SPATA31A7	-16.6	7.02	172	7.42e-05	0.00938	4.13
15	43500000	43500000	20700	+	ENSG00000166963	MAP1A	NA	protein_coding	NA	MAP1A	-15.5	6.58	171	7.45e-05	0.00938	4.13
11	115000000	116000000	336000	-	ENSG00000182985	CADM1	NA	protein_coding	NA	CADM1	8.5	11.7	104	7.46e-05	0.00938	4.13
6	27800000	27900000	28000	+	ENSG00000233822	HIST1H2BN	NA	protein_coding	NA	HIST1H2BN	10.9	12	104	7.49e-05	0.00938	4.13
20	63600000	63600000	16200	-	ENSG00000130589	HELZ2	NA	protein_coding	NA	HELZ2	-15.8	6.5	171	7.53e-05	0.00938	4.12
6	154000000	154000000	236000	+	ENSG00000112038	OPRM1	NA	protein_coding	NA	OPRM1	-11.9	5.41	103	7.57e-05	0.00938	4.12
1	152000000	152000000	23000	-	ENSG00000143631	FLG	NA	protein_coding	NA	FLG	-15.3	6.74	170	7.58e-05	0.00938	4.12
1	31900000	31900000	38400	-	ENSG00000184007	PTP4A2	NA	protein_coding	NA	PTP4A2	8.48	9.77	103	7.59e-05	0.00938	4.12
10	120000000	120000000	25200	-	ENSG00000151923	TIAL1	NA	protein_coding	NA	TIAL1	7.24	9.93	103	7.62e-05	0.00938	4.12
6	35500000	35500000	23500	-	ENSG00000007866	TEAD3	NA	protein_coding	NA	TEAD3	-15.6	6.68	170	7.63e-05	0.00938	4.12
6	51600000	52100000	472000	-	ENSG00000170927	PKHD1	NA	protein_coding	NA	PKHD1	-13.3	6.76	103	7.64e-05	0.00938	4.12
18	47000000	47000000	1220	-	ENSG00000275553	ELOA3C	NA	processed_pseudogene	NA	ELOA3C	-17.1	7.92	169	7.64e-05	0.00938	4.12
3	53200000	53300000	31300	-	ENSG00000163931	TKT	NA	protein_coding	NA	TKT	7.7	9.8	103	7.71e-05	0.00938	4.11
19	37900000	37900000	21900	-	ENSG00000171804	WDR87	NA	protein_coding	NA	WDR87	-16.3	7.07	168	7.76e-05	0.00938	4.11
17	7720000	7830000	116000	+	ENSG00000183914	DNAH2	NA	protein_coding	NA	DNAH2	-16.3	6.68	168	7.82e-05	0.00938	4.11
9	110000000	111000000	215000	-	ENSG00000165124	SVEP1	NA	protein_coding	NA	SVEP1	-15.1	6.52	167	7.9e-05	0.00938	4.1
5	90500000	91200000	635000	+	ENSG00000164199	ADGRV1	NA	protein_coding	NA	ADGRV1	-14.8	6.81	167	7.92e-05	0.00938	4.1
19	6750000	6770000	15300	-	ENSG00000125731	SH2D3A	NA	protein_coding	NA	SH2D3A	-11.5	5.19	101	8.11e-05	0.00938	4.09
10	17200000	17200000	9350	+	ENSG00000026025	VIM	NA	protein_coding	NA	VIM	9.14	11.4	100	8.15e-05	0.00938	4.09
7	101000000	101000000	5610	+	ENSG00000172354	GNB2	NA	protein_coding	NA	GNB2	6.74	9.3	99.6	8.35e-05	0.00938	4.08
13	95600000	95600000	66500	-	ENSG00000134874	DZIP1	NA	protein_coding	NA	DZIP1	-14.8	6.51	163	8.37e-05	0.00938	4.08
16	88400000	88400000	57800	+	ENSG00000225614	ZNF469	NA	protein_coding	NA	ZNF469	-16.4	7.48	163	8.4e-05	0.00938	4.08
4	9240000	9250000	1950	+	ENSG00000249104	USP17L17	NA	protein_coding	NA	USP17L17	-17.1	8.01	162	8.47e-05	0.00938	4.07
4	2270000	2420000	149000	-	ENSG00000159733	ZFYVE28	NA	protein_coding	NA	ZFYVE28	-15.8	6.59	161	8.54e-05	0.00938	4.07
19	37500000	37500000	21100	+	ENSG00000171827	ZNF570	NA	protein_coding	NA	ZNF570	-13.7	4.93	98.6	8.58e-05	0.00938	4.07
3	39200000	39200000	9390	-	ENSG00000168334	XIRP1	NA	protein_coding	NA	XIRP1	-15.6	6.49	160	8.66e-05	0.00938	4.06
1	31700000	31700000	52100	-	ENSG00000084636	COL16A1	NA	protein_coding	NA	COL16A1	-15.7	6.4	160	8.71e-05	0.00938	4.06
19	1040000	1070000	25500	+	ENSG00000064687	ABCA7	NA	protein_coding	NA	ABCA7	-15.6	6.63	160	8.75e-05	0.00938	4.06
7	35800000	35900000	106000	+	ENSG00000122545	SEPTIN7	NA	protein_coding	NA	SEPTIN7	7.95	10.2	97.5	8.83e-05	0.00938	4.05
6	151000000	151000000	119000	+	ENSG00000131016	AKAP12	NA	protein_coding	NA	AKAP12	-15.3	6.44	159	8.83e-05	0.00938	4.05
15	48700000	48800000	98200	-	ENSG00000103995	CEP152	NA	protein_coding	NA	CEP152	-11.9	6.21	97.5	8.84e-05	0.00938	4.05
4	9240000	9240000	1590	+	ENSG00000250231	USP17L16P	NA	unprocessed_pseudogene	NA	USP17L16P	-15.8	6.23	158	9e-05	0.00938	4.05
21	46300000	46400000	122000	+	ENSG00000160299	PCNT	NA	protein_coding	NA	PCNT	-16.1	6.75	157	9.07e-05	0.00938	4.04
16	30100000	30100000	6290	+	ENSG00000149925	ALDOA	NA	protein_coding	NA	ALDOA	10.2	12.7	96.5	9.08e-05	0.00938	4.04
4	1390000	1400000	4440	+	ENSG00000288380	CRIPAK	NA	protein_coding	NA	CRIPAK	-15.7	6.47	157	9.09e-05	0.00938	4.04
X	3310000	3350000	38100	-	ENSG00000101825	MXRA5	NA	protein_coding	NA	MXRA5	-15.2	6.25	157	9.1e-05	0.00938	4.04
13	113000000	113000000	53900	-	ENSG00000153531	ADPRHL1	NA	protein_coding	NA	ADPRHL1	-15.7	6.83	156	9.2e-05	0.00938	4.04
6	149000000	149000000	193000	+	ENSG00000055208	TAB2	NA	protein_coding	NA	TAB2	8.92	9.99	95.9	9.24e-05	0.00938	4.03
16	70800000	71200000	429000	-	ENSG00000157423	HYDIN	NA	protein_coding	NA	HYDIN	-14.7	6.44	156	9.27e-05	0.00938	4.03
11	86000000	86100000	113000	-	ENSG00000073921	PICALM	NA	protein_coding	NA	PICALM	7.12	9.81	95.6	9.32e-05	0.00938	4.03
16	9090000	9120000	30000	+	ENSG00000182831	C16orf72	NA	protein_coding	NA	C16orf72	7.89	10.4	95.4	9.37e-05	0.00938	4.03
17	10600000	10700000	28800	-	ENSG00000109063	MYH3	NA	protein_coding	NA	MYH3	-12	5.07	95.3	9.41e-05	0.00938	4.03
14	88600000	88600000	64600	+	ENSG00000100722	ZC3H14	NA	protein_coding	NA	ZC3H14	8.58	10.7	94.5	9.6e-05	0.00938	4.02
6	70900000	71000000	100000	-	ENSG00000112309	B3GAT2	NA	protein_coding	NA	B3GAT2	-11	6.07	94.4	9.63e-05	0.00938	4.02
22	50200000	50200000	27300	-	ENSG00000128159	TUBGCP6	NA	protein_coding	NA	TUBGCP6	-15	6.45	153	9.64e-05	0.00938	4.02
2	96600000	96700000	62200	+	ENSG00000249715	FER1L5	NA	protein_coding	NA	FER1L5	-15.1	6.23	153	9.66e-05	0.00938	4.01
6	35700000	35700000	12000	+	ENSG00000157343	ARMC12	NA	protein_coding	NA	ARMC12	-15.1	6.28	152	9.72e-05	0.00938	4.01
2	95800000	96000000	155000	-	ENSG00000174501	ANKRD36C	NA	protein_coding	NA	ANKRD36C	-14.8	6.94	152	9.72e-05	0.00938	4.01
16	57900000	58000000	88800	-	ENSG00000070729	CNGB1	NA	protein_coding	NA	CNGB1	-13.6	5.01	94	9.74e-05	0.00938	4.01
6	111000000	111000000	24100	+	ENSG00000123505	AMD1	NA	protein_coding	NA	AMD1	6.77	9.38	94	9.74e-05	0.00938	4.01
16	70000000	70000000	19800	-	ENSG00000226232	NPIPB14P	NA	transcribed_unprocessed_pseudogene	NA	NPIPB14P	-14.3	6.6	152	9.77e-05	0.00938	4.01
2	169000000	169000000	235000	-	ENSG00000081479	LRP2	NA	protein_coding	NA	LRP2	-15.4	6.81	151	9.87e-05	0.00938	4.01
3	142000000	142000000	576	-	ENSG00000233597	AC133435.1	NA	processed_pseudogene	NA	AC133435.1	17.8	10.9	151	9.9e-05	0.00938	4
16	15100000	15100000	14800	+	ENSG00000260735	AC139256.1	NA	transcribed_processed_pseudogene	NA	AC139256.1	-15.9	7.52	151	9.96e-05	0.00938	4
3	179000000	179000000	92000	+	ENSG00000121879	PIK3CA	NA	protein_coding	NA	PIK3CA	8.48	8.53	93.1	0.0001	0.00938	4
7	16600000	16700000	60400	+	ENSG00000136261	BZW2	NA	protein_coding	NA	BZW2	6.45	9.12	92.7	0.000101	0.00938	4
21	46000000	46000000	23300	+	ENSG00000142156	COL6A1	NA	protein_coding	NA	COL6A1	-15.8	6.51	150	0.000101	0.00938	4
4	125000000	125000000	177000	+	ENSG00000196159	FAT4	NA	protein_coding	NA	FAT4	-15.3	6.45	150	0.000101	0.00938	4
1	23300000	23300000	40600	-	ENSG00000125944	HNRNPR	NA	protein_coding	NA	HNRNPR	7.68	10.5	92.4	0.000102	0.00938	3.99
14	63900000	64200000	373000	+	ENSG00000054654	SYNE2	NA	protein_coding	NA	SYNE2	-15	6.84	148	0.000104	0.00938	3.98
1	205000000	205000000	35400	+	ENSG00000184144	CNTN2	NA	protein_coding	NA	CNTN2	-12.9	5.5	91.7	0.000104	0.00938	3.98
6	42100000	42100000	41500	-	ENSG00000188112	C6orf132	NA	protein_coding	NA	C6orf132	-13.4	6.37	91.9	0.000104	0.00938	3.98
8	47800000	48000000	187000	-	ENSG00000253729	PRKDC	NA	protein_coding	NA	PRKDC	-14.6	6.15	148	0.000104	0.00938	3.98
17	48000000	48100000	13200	+	ENSG00000082641	NFE2L1	NA	protein_coding	NA	NFE2L1	6.77	10.3	91.4	0.000105	0.00938	3.98
3	57300000	57500000	251000	-	ENSG00000174844	DNAH12	NA	protein_coding	NA	DNAH12	-15.2	6.96	146	0.000106	0.00938	3.97
19	55500000	55500000	30700	+	ENSG00000179954	SSC5D	NA	protein_coding	NA	SSC5D	-13.5	6.7	91.3	0.000106	0.00938	3.98
6	46700000	46700000	16400	+	ENSG00000180113	TDRD6	NA	protein_coding	NA	TDRD6	-15.3	7.11	146	0.000107	0.00938	3.97
6	38700000	39000000	315000	+	ENSG00000124721	DNAH8	NA	protein_coding	NA	DNAH8	-15.8	8.04	146	0.000108	0.00938	3.97
4	82900000	83000000	103000	-	ENSG00000189308	LIN54	NA	protein_coding	NA	LIN54	7.82	8.22	90.2	0.000109	0.00938	3.96
1	1920000	2000000	81900	-	ENSG00000142609	CFAP74	NA	protein_coding	NA	CFAP74	-16.1	6.22	144	0.00011	0.00938	3.96
11	34100000	34100000	50900	+	ENSG00000135387	CAPRIN1	NA	protein_coding	NA	CAPRIN1	7.13	9.62	89.6	0.000111	0.00938	3.96
21	45400000	45500000	109000	+	ENSG00000182871	COL18A1	NA	protein_coding	NA	COL18A1	-14.9	6.12	144	0.000111	0.00938	3.95
9	115000000	115000000	11100	+	ENSG00000136888	ATP6V1G1	NA	protein_coding	NA	ATP6V1G1	9.69	9.61	89.1	0.000113	0.00938	3.95
17	64900000	64900000	65200	-	ENSG00000176809	LRRC37A3	NA	protein_coding	NA	LRRC37A3	-14.4	6.29	143	0.000113	0.00938	3.95
7	11400000	11800000	462000	-	ENSG00000005108	THSD7A	NA	protein_coding	NA	THSD7A	-12.4	5.68	88.7	0.000114	0.00938	3.94
3	52500000	52500000	29200	+	ENSG00000010327	STAB1	NA	protein_coding	NA	STAB1	-14.3	7	88.8	0.000114	0.00938	3.94
3	48400000	48400000	26200	-	ENSG00000164050	PLXNB1	NA	protein_coding	NA	PLXNB1	-15.2	6.28	142	0.000114	0.00938	3.94
6	35500000	35500000	14700	+	ENSG00000112039	FANCE	NA	protein_coding	NA	FANCE	-15.1	6.15	142	0.000115	0.00938	3.94
13	51200000	51300000	61900	+	ENSG00000150510	FAM124A	NA	protein_coding	NA	FAM124A	-10.9	5.08	88.5	0.000115	0.00938	3.94
11	6500000	6590000	96500	+	ENSG00000179532	DNHD1	NA	protein_coding	NA	DNHD1	-15.4	6.18	142	0.000115	0.00938	3.94
2	20000000	20100000	19000	-	ENSG00000068697	LAPTM4A	NA	protein_coding	NA	LAPTM4A	7.04	9.27	88	0.000116	0.00938	3.93
22	37200000	37200000	19200	-	ENSG00000128340	RAC2	NA	protein_coding	NA	RAC2	7.12	7.98	88.1	0.000116	0.00938	3.94
7	150000000	150000000	57900	+	ENSG00000197558	SSPO	NA	protein_coding	NA	SSPO	-16.6	8.02	141	0.000116	0.00938	3.94
1	117000000	117000000	47100	+	ENSG00000116830	TTF2	NA	protein_coding	NA	TTF2	-14.3	5.46	87.7	0.000117	0.00938	3.93
7	44000000	44000000	12200	+	ENSG00000136206	SPDYE1	NA	protein_coding	NA	SPDYE1	-15.6	6.07	140	0.000117	0.00938	3.93
6	47000000	47000000	44600	-	ENSG00000153292	ADGRF1	NA	protein_coding	NA	ADGRF1	-14.6	6.44	141	0.000117	0.00938	3.93
1	154000000	155000000	32600	-	ENSG00000169291	SHE	NA	protein_coding	NA	SHE	-14.7	6.24	141	0.000117	0.00938	3.93
6	35100000	35100000	30500	-	ENSG00000124678	TCP11	NA	protein_coding	NA	TCP11	-15.3	6.79	140	0.000118	0.00938	3.93
17	58000000	58000000	6430	-	ENSG00000136450	SRSF1	NA	protein_coding	NA	SRSF1	6.74	11	87.5	0.000118	0.00938	3.93
17	7240000	7240000	2440	-	ENSG00000170296	GABARAP	NA	protein_coding	NA	GABARAP	10.1	9.19	140	0.000119	0.00938	3.93
20	3690000	3710000	20200	-	ENSG00000088827	SIGLEC1	NA	protein_coding	NA	SIGLEC1	-15.7	6.52	139	0.00012	0.00938	3.92
6	169000000	170000000	245000	-	ENSG00000184465	WDR27	NA	protein_coding	NA	WDR27	-15.7	6.38	139	0.00012	0.00938	3.92
1	225000000	225000000	503000	+	ENSG00000185842	DNAH14	NA	protein_coding	NA	DNAH14	-14.8	7.13	139	0.00012	0.00938	3.92
19	22300000	22300000	30700	+	ENSG00000196350	ZNF729	NA	protein_coding	NA	ZNF729	-14.4	6.18	139	0.00012	0.00938	3.92
19	30200000	30700000	485000	+	ENSG00000198597	ZNF536	NA	protein_coding	NA	ZNF536	-9.82	5.81	87	0.00012	0.00938	3.92
17	77100000	77200000	128000	+	ENSG00000129657	SEC14L1	NA	protein_coding	NA	SEC14L1	-14.7	5.92	138	0.000121	0.00938	3.92
2	131000000	131000000	47200	+	ENSG00000188219	POTEE	NA	protein_coding	NA	POTEE	-8.5	6.21	86.6	0.000121	0.00938	3.92
3	49400000	49400000	53900	-	ENSG00000067560	RHOA	NA	protein_coding	NA	RHOA	9.02	11.3	86.4	0.000122	0.00938	3.91
13	113000000	113000000	197000	+	ENSG00000068650	ATP11A	NA	protein_coding	NA	ATP11A	-14.8	6.17	138	0.000122	0.00938	3.91
1	237000000	237000000	55500	-	ENSG00000119285	HEATR1	NA	protein_coding	NA	HEATR1	-14.2	6.38	138	0.000122	0.00938	3.91
6	44300000	44300000	14600	-	ENSG00000124608	AARS2	NA	protein_coding	NA	AARS2	-15.2	5.88	138	0.000122	0.00938	3.91
15	78800000	78800000	52300	-	ENSG00000136378	ADAMTS7	NA	protein_coding	NA	ADAMTS7	-16.2	6.92	138	0.000122	0.00938	3.91
12	1570000	1590000	28600	-	ENSG00000171823	FBXL14	NA	protein_coding	NA	FBXL14	7.83	9.34	86.4	0.000122	0.00938	3.91
13	97200000	97400000	173000	+	ENSG00000139793	MBNL2	NA	protein_coding	NA	MBNL2	7.45	8.49	86	0.000124	0.00938	3.91
9	114000000	114000000	180000	+	ENSG00000157657	ZNF618	NA	protein_coding	NA	ZNF618	-12.3	5.1	86	0.000124	0.00938	3.91
11	10800000	10800000	11900	-	ENSG00000110321	EIF4G2	NA	protein_coding	NA	EIF4G2	10.4	14.1	85.8	0.000125	0.00938	3.9
12	54300000	54400000	50600	+	ENSG00000111481	COPZ1	NA	protein_coding	NA	COPZ1	6.84	7.83	85.6	0.000125	0.00938	3.9
12	6650000	6660000	12800	-	ENSG00000111653	ING4	NA	protein_coding	NA	ING4	6.47	7.82	85.7	0.000125	0.00938	3.9
6	37600000	37700000	68600	-	ENSG00000112139	MDGA1	NA	protein_coding	NA	MDGA1	-8.99	6.77	85.7	0.000125	0.00938	3.9
4	24500000	24600000	67100	-	ENSG00000109606	DHX15	NA	protein_coding	NA	DHX15	7.18	10.5	85.4	0.000126	0.00938	3.9
7	140000000	140000000	26500	-	ENSG00000133606	MKRN1	NA	protein_coding	NA	MKRN1	6.59	10	85.4	0.000126	0.00938	3.9
8	101000000	101000000	37000	-	ENSG00000070756	PABPC1	NA	protein_coding	NA	PABPC1	11.3	15.5	85.2	0.000127	0.00938	3.9
2	130000000	130000000	584	+	ENSG00000226915	AC068137.1	NA	processed_pseudogene	NA	AC068137.1	15.7	8.91	135	0.000127	0.00938	3.9
1	42700000	42700000	21400	+	ENSG00000065978	YBX1	NA	protein_coding	NA	YBX1	9.9	14.6	84.8	0.000128	0.00938	3.89
15	38300000	38400000	104000	+	ENSG00000166068	SPRED1	NA	protein_coding	NA	SPRED1	7.09	7.4	85	0.000128	0.00938	3.89
12	121000000	121000000	44100	+	ENSG00000022840	RNF10	NA	protein_coding	NA	RNF10	7.24	10.3	84.8	0.000129	0.00938	3.89
19	3000000	3050000	50000	-	ENSG00000065717	TLE2	NA	protein_coding	NA	TLE2	-11.6	5.42	84.8	0.000129	0.00938	3.89
19	44800000	44800000	12400	+	ENSG00000187244	BCAM	NA	protein_coding	NA	BCAM	-15.8	6.45	134	0.000129	0.00938	3.89
17	40100000	40100000	14900	+	ENSG00000188895	MSL1	NA	protein_coding	NA	MSL1	6.45	9.73	84.6	0.000129	0.00938	3.89
7	102000000	102000000	468000	+	ENSG00000257923	CUX1	NA	protein_coding	NA	CUX1	6.38	10.3	84.6	0.000129	0.00938	3.89
21	44200000	44200000	24000	-	ENSG00000160223	ICOSLG	NA	protein_coding	NA	ICOSLG	-15	6.07	134	0.00013	0.00938	3.88
19	39900000	39900000	71300	-	ENSG00000275395	FCGBP	NA	protein_coding	NA	FCGBP	-14.4	7.82	84.4	0.00013	0.00938	3.89
6	53900000	54300000	336000	+	ENSG00000146147	MLIP	NA	protein_coding	NA	MLIP	-15.5	6.63	134	0.000131	0.00938	3.88
1	157000000	157000000	66200	+	ENSG00000198400	NTRK1	NA	protein_coding	NA	NTRK1	-11.5	5.41	83.9	0.000132	0.00938	3.88
2	97700000	97700000	26300	+	ENSG00000115085	ZAP70	NA	protein_coding	NA	ZAP70	-15.3	5.68	133	0.000133	0.00938	3.88
17	36200000	36200000	11000	-	ENSG00000274808	TBC1D3B	NA	protein_coding	NA	TBC1D3B	-16.5	6.67	133	0.000133	0.00938	3.88
12	120000000	120000000	28600	+	ENSG00000088986	DYNLL1	NA	protein_coding	NA	DYNLL1	9.48	10.1	83.4	0.000134	0.00938	3.87
5	79700000	79800000	110000	+	ENSG00000164309	CMYA5	NA	protein_coding	NA	CMYA5	-14.9	6.25	132	0.000134	0.00938	3.87
16	28500000	28500000	4330	+	ENSG00000184730	APOBR	NA	protein_coding	NA	APOBR	-14.9	5.82	132	0.000134	0.00938	3.87
10	104000000	104000000	102000	-	ENSG00000197748	CFAP43	NA	protein_coding	NA	CFAP43	-13.9	6.18	132	0.000134	0.00938	3.87
4	2080000	2240000	163000	-	ENSG00000214367	HAUS3	NA	protein_coding	NA	HAUS3	-14.7	5.92	132	0.000134	0.00938	3.87
6	159000000	159000000	103000	+	ENSG00000164694	FNDC1	NA	protein_coding	NA	FNDC1	-15.2	6.66	132	0.000135	0.00938	3.87
6	34600000	34700000	110000	-	ENSG00000196821	ILRUN	NA	protein_coding	NA	ILRUN	6.32	9.33	83.3	0.000135	0.00938	3.87
10	47800000	47800000	12700	-	ENSG00000277758	FO681492.1	NA	protein_coding	NA	FO681492.1	-13	5.98	83.3	0.000135	0.00938	3.87
20	472000	544000	71300	-	ENSG00000101266	CSNK2A1	NA	protein_coding	NA	CSNK2A1	7.03	10.8	83.1	0.000136	0.00938	3.87
7	149000000	149000000	23500	-	ENSG00000204947	ZNF425	NA	protein_coding	NA	ZNF425	-14.6	5.97	132	0.000136	0.00938	3.87
6	106000000	106000000	280000	-	ENSG00000057663	ATG5	NA	protein_coding	NA	ATG5	6.51	7.2	82.8	0.000137	0.00938	3.86
13	98000000	98000000	70600	+	ENSG00000065150	IPO5	NA	protein_coding	NA	IPO5	6.87	8.47	82.8	0.000137	0.00938	3.86
22	39300000	39400000	35700	+	ENSG00000100321	SYNGR1	NA	protein_coding	NA	SYNGR1	6.24	7.33	82.5	0.000138	0.00938	3.86
16	58500000	58600000	110000	-	ENSG00000125107	CNOT1	NA	protein_coding	NA	CNOT1	7.32	11.3	82.7	0.000138	0.00938	3.86
1	23700000	23700000	5090	+	ENSG00000142676	RPL11	NA	protein_coding	NA	RPL11	9.33	13	82.6	0.000138	0.00938	3.86
1	247000000	247000000	92900	-	ENSG00000153207	AHCTF1	NA	protein_coding	NA	AHCTF1	-14.6	6.23	131	0.000138	0.00938	3.86
1	121000000	121000000	118000	+	ENSG00000273136	NBPF26	NA	protein_coding	NA	NBPF26	-15.2	6.6	130	0.000139	0.00938	3.86
5	152000000	152000000	64900	-	ENSG00000086570	FAT2	NA	protein_coding	NA	FAT2	-14.6	6.04	130	0.00014	0.00938	3.85
6	36700000	36700000	35400	+	ENSG00000255587	RAB44	NA	protein_coding	NA	RAB44	-15	5.8	129	0.000141	0.00938	3.85
6	30900000	31000000	19700	+	ENSG00000168631	MUCL3	NA	protein_coding	NA	MUCL3	-13.5	6.69	81.8	0.000142	0.00938	3.85
8	10600000	10700000	106000	-	ENSG00000183638	RP1L1	NA	protein_coding	NA	RP1L1	-16.1	6.84	129	0.000142	0.00938	3.85
8	133000000	133000000	268000	+	ENSG00000042832	TG	NA	protein_coding	NA	TG	-14.9	6.36	129	0.000143	0.00938	3.85
13	107000000	107000000	26500	-	ENSG00000134884	ARGLU1	NA	protein_coding	NA	ARGLU1	6.62	10.7	81.5	0.000143	0.00938	3.84
9	123000000	123000000	24200	+	ENSG00000148204	CRB2	NA	protein_coding	NA	CRB2	-14.9	5.71	129	0.000143	0.00938	3.85
2	26400000	26500000	54800	+	ENSG00000157856	DRC1	NA	protein_coding	NA	DRC1	-13.9	5.87	128	0.000143	0.00938	3.84
19	4500000	4520000	16300	-	ENSG00000167676	PLIN4	NA	protein_coding	NA	PLIN4	-15	5.89	129	0.000143	0.00938	3.84
1	8320000	8340000	26300	+	ENSG00000162426	SLC45A1	NA	protein_coding	NA	SLC45A1	-14.9	5.7	128	0.000144	0.00938	3.84
1	1220000	1230000	15200	-	ENSG00000078808	SDF4	NA	protein_coding	NA	SDF4	-15.8	6.55	128	0.000145	0.00938	3.84
19	49000000	49000000	1110	-	ENSG00000104826	LHB	NA	protein_coding	NA	LHB	-15	5.79	128	0.000145	0.00938	3.84
6	63700000	65700000	1990000	-	ENSG00000188107	EYS	NA	protein_coding	NA	EYS	-14.2	6.19	128	0.000145	0.00938	3.84
12	96500000	96900000	386000	+	ENSG00000188596	CFAP54	NA	protein_coding	NA	CFAP54	-14.6	5.86	128	0.000145	0.00938	3.84
1	147000000	147000000	57500	+	ENSG00000268043	NBPF12	NA	protein_coding	NA	NBPF12	-14.2	5.82	128	0.000145	0.00938	3.84
1	146000000	146000000	164000	-	ENSG00000271425	NBPF10	NA	protein_coding	NA	NBPF10	-15.4	7.02	128	0.000145	0.00938	3.84
13	46600000	46800000	200000	+	ENSG00000136141	LRCH1	NA	protein_coding	NA	LRCH1	-13.9	5.84	127	0.000146	0.00938	3.84
8	13100000	13600000	521000	-	ENSG00000164741	DLC1	NA	protein_coding	NA	DLC1	-15.5	6.3	128	0.000146	0.00938	3.84
8	7540000	7540000	2820	+	ENSG00000255251	PRR23D1	NA	protein_coding	NA	PRR23D1	-14.7	5.97	127	0.000146	0.00938	3.84
6	39800000	39900000	113000	+	ENSG00000146122	DAAM2	NA	protein_coding	NA	DAAM2	-14.5	5.8	127	0.000147	0.00938	3.83
2	106000000	106000000	77100	-	ENSG00000153165	RGPD3	NA	protein_coding	NA	RGPD3	-16.3	7.69	127	0.000147	0.00938	3.83
7	102000000	102000000	8210	+	ENSG00000161036	LRWD1	NA	protein_coding	NA	LRWD1	-15.4	5.73	127	0.000147	0.00938	3.83
15	82500000	82600000	106000	-	ENSG00000214575	CPEB1	NA	protein_coding	NA	CPEB1	-13.3	4.57	80.6	0.000147	0.00938	3.83
12	5950000	6120000	176000	-	ENSG00000110799	VWF	NA	protein_coding	NA	VWF	-14	5.98	127	0.000148	0.00938	3.83
1	171000000	172000000	108000	+	ENSG00000117523	PRRC2C	NA	protein_coding	NA	PRRC2C	6.14	10	80.5	0.000148	0.00938	3.83
13	20000000	20100000	133000	+	ENSG00000121741	ZMYM2	NA	protein_coding	NA	ZMYM2	6.46	9.72	80.3	0.000149	0.00938	3.83
17	35600000	35700000	148000	+	ENSG00000006125	AP2B1	NA	protein_coding	NA	AP2B1	7.62	8.9	80	0.00015	0.00938	3.82
10	95700000	95900000	165000	+	ENSG00000138185	ENTPD1	NA	protein_coding	NA	ENTPD1	-15.1	6.39	126	0.00015	0.00938	3.83
1	233000000	233000000	3520	+	ENSG00000212916	MAP10	NA	protein_coding	NA	MAP10	-15.1	5.53	126	0.00015	0.00938	3.82
1	13100000	13100000	9210	+	ENSG00000229571	PRAMEF25	NA	protein_coding	NA	PRAMEF25	-15.2	5.67	126	0.00015	0.00938	3.83
9	13100000	13300000	174000	-	ENSG00000107186	MPDZ	NA	protein_coding	NA	MPDZ	-14	5.92	126	0.000151	0.00938	3.82
19	1000000	1010000	9310	+	ENSG00000116032	GRIN3B	NA	protein_coding	NA	GRIN3B	-15	6.07	126	0.000151	0.00938	3.82
6	168000000	168000000	48300	-	ENSG00000153303	FRMD1	NA	protein_coding	NA	FRMD1	-14.7	5.62	125	0.000151	0.00938	3.82
3	113000000	113000000	155000	-	ENSG00000206530	CFAP44	NA	protein_coding	NA	CFAP44	-13.7	5.92	125	0.000152	0.00938	3.82
19	48900000	48900000	3640	+	ENSG00000087074	PPP1R15A	NA	protein_coding	NA	PPP1R15A	-14.8	5.83	125	0.000153	0.00938	3.81
13	51800000	51800000	36200	-	ENSG00000102796	DHRS12	NA	protein_coding	NA	DHRS12	-15	5.79	125	0.000153	0.00938	3.82
1	152000000	152000000	11300	-	ENSG00000143520	FLG2	NA	protein_coding	NA	FLG2	-14.9	6	125	0.000153	0.00938	3.81
7	143000000	143000000	18600	-	ENSG00000146904	EPHA1	NA	protein_coding	NA	EPHA1	-14.9	5.76	125	0.000153	0.00938	3.82
14	105000000	105000000	106000	-	ENSG00000185024	BRF1	NA	protein_coding	NA	BRF1	-14.6	5.65	125	0.000153	0.00938	3.82
16	20900000	21200000	226000	-	ENSG00000158486	DNAH3	NA	protein_coding	NA	DNAH3	-14.8	6.19	125	0.000154	0.00938	3.81
9	105000000	105000000	195000	+	ENSG00000070214	SLC44A1	NA	protein_coding	NA	SLC44A1	7.38	10.7	79	0.000155	0.00938	3.81
1	16200000	16200000	14800	-	ENSG00000142632	ARHGEF19	NA	protein_coding	NA	ARHGEF19	-15.9	5.68	124	0.000155	0.00938	3.81
6	166000000	166000000	11000	-	ENSG00000164458	TBXT	NA	protein_coding	NA	TBXT	-14.5	5.87	124	0.000155	0.00938	3.81
9	42200000	42200000	6230	+	ENSG00000185775	SPATA31A6	NA	protein_coding	NA	SPATA31A6	-15.7	6.87	124	0.000155	0.00938	3.81
8	8020000	8020000	5220	-	ENSG00000215354	FAM90A24P	NA	transcribed_unprocessed_pseudogene	NA	FAM90A24P	-14.5	5.72	124	0.000155	0.00938	3.81
1	13000000	13100000	7020	-	ENSG00000274764	PRAMEF27	NA	protein_coding	NA	PRAMEF27	-13.8	6.1	124	0.000155	0.00938	3.81
9	72400000	72400000	13800	-	ENSG00000107372	ZFAND5	NA	protein_coding	NA	ZFAND5	8.84	10.3	78.8	0.000156	0.00938	3.81
1	24100000	24100000	56100	-	ENSG00000142661	MYOM3	NA	protein_coding	NA	MYOM3	-14.6	5.64	124	0.000156	0.00938	3.81
7	108000000	108000000	79400	-	ENSG00000091136	LAMB1	NA	protein_coding	NA	LAMB1	-14.5	5.95	123	0.000157	0.00938	3.8
8	30800000	30800000	39900	-	ENSG00000104695	PPP2CB	NA	protein_coding	NA	PPP2CB	7.01	7.85	78.7	0.000157	0.00938	3.8
1	146000000	147000000	442000	+	ENSG00000276975	HYDIN2	NA	transcribed_unprocessed_pseudogene	NA	HYDIN2	-14.4	6.69	123	0.000157	0.00938	3.8
14	104000000	104000000	42200	+	ENSG00000066735	KIF26A	NA	protein_coding	NA	KIF26A	-15.1	6.16	123	0.000158	0.00938	3.8
22	28000000	28700000	702000	-	ENSG00000100154	TTC28	NA	protein_coding	NA	TTC28	-8.73	5.67	78.5	0.000158	0.00938	3.8
7	129000000	129000000	48300	-	ENSG00000135253	KCP	NA	protein_coding	NA	KCP	-15.7	6.24	123	0.000158	0.00938	3.8
11	72800000	72800000	39000	-	ENSG00000214530	STARD10	NA	protein_coding	NA	STARD10	7.59	8.9	78.5	0.000158	0.00938	3.8
19	47500000	47600000	35200	-	ENSG00000118156	ZNF541	NA	protein_coding	NA	ZNF541	-15	6.42	123	0.000159	0.00938	3.8
8	22100000	22100000	19000	-	ENSG00000168453	HR	NA	protein_coding	NA	HR	-14.9	5.94	123	0.000159	0.00938	3.8
7	159000000	159000000	100000	+	ENSG00000126870	WDR60	NA	protein_coding	NA	WDR60	-15.4	6.04	122	0.00016	0.00938	3.79
16	31500000	31500000	9090	+	ENSG00000140691	ARMC5	NA	protein_coding	NA	ARMC5	-15	6.34	122	0.00016	0.00938	3.8
6	158000000	158000000	117000	+	ENSG00000078269	SYNJ2	NA	protein_coding	NA	SYNJ2	-7.06	6.14	77.9	0.000161	0.00938	3.79
6	85600000	85600000	36000	-	ENSG00000135316	SYNCRIP	NA	protein_coding	NA	SYNCRIP	7.92	11.3	77.9	0.000161	0.00938	3.79
1	149000000	150000000	81000	+	ENSG00000271383	NBPF19	NA	protein_coding	NA	NBPF19	-14.8	6.38	122	0.000161	0.00938	3.79
7	27700000	27800000	105000	+	ENSG00000106052	TAX1BP1	NA	protein_coding	NA	TAX1BP1	6	8.07	77.8	0.000162	0.00938	3.79
X	71700000	71700000	3780	-	ENSG00000215115	CXorf49	NA	protein_coding	NA	CXorf49	-15	5.8	122	0.000162	0.00938	3.79
3	190000000	190000000	266000	+	ENSG00000073282	TP63	NA	protein_coding	NA	TP63	-13.1	5.17	77.5	0.000163	0.00938	3.79
11	111000000	111000000	136000	-	ENSG00000137727	ARHGAP20	NA	protein_coding	NA	ARHGAP20	-14.4	5.91	121	0.000163	0.00938	3.79
8	144000000	144000000	15700	-	ENSG00000160949	TONSL	NA	protein_coding	NA	TONSL	-15.3	6.34	121	0.000163	0.00938	3.79
2	218000000	218000000	37200	+	ENSG00000163466	ARPC2	NA	protein_coding	NA	ARPC2	10.7	12.5	77.6	0.000163	0.00938	3.79
2	20200000	20400000	104000	-	ENSG00000055917	PUM2	NA	protein_coding	NA	PUM2	7.66	11.4	77.3	0.000164	0.00938	3.78
19	532000	542000	10300	+	ENSG00000099804	CDC34	NA	protein_coding	NA	CDC34	5.79	7.48	77.4	0.000164	0.00938	3.79
14	74500000	74600000	114000	-	ENSG00000119681	LTBP2	NA	protein_coding	NA	LTBP2	-14.5	5.9	121	0.000164	0.00938	3.79
X	136000000	136000000	116000	+	ENSG00000156920	ADGRG4	NA	protein_coding	NA	ADGRG4	-14.2	5.67	121	0.000164	0.00938	3.78
12	53000000	53100000	17400	+	ENSG00000111077	TNS2	NA	protein_coding	NA	TNS2	-14.9	5.6	120	0.000166	0.00938	3.78
17	73300000	73600000	310000	-	ENSG00000069188	SDK2	NA	protein_coding	NA	SDK2	-13.2	5.58	76.9	0.000167	0.00938	3.78
3	181000000	181000000	115000	+	ENSG00000114416	FXR1	NA	protein_coding	NA	FXR1	8	9.58	76.7	0.000168	0.00938	3.77
15	28100000	28300000	211000	-	ENSG00000128731	HERC2	NA	protein_coding	NA	HERC2	-7.63	6.14	76.7	0.000168	0.00938	3.77
6	36200000	36300000	69000	+	ENSG00000180316	PNPLA1	NA	protein_coding	NA	PNPLA1	-14.4	5.56	120	0.000168	0.00938	3.78
1	39800000	39800000	1830	-	ENSG00000198754	OXCT2	NA	protein_coding	NA	OXCT2	-14.3	5.62	120	0.000168	0.00938	3.78
19	18800000	18800000	8530	-	ENSG00000105664	COMP	NA	protein_coding	NA	COMP	-15.1	6.37	119	0.000169	0.00938	3.77
5	141000000	141000000	3880	+	ENSG00000120328	PCDHB12	NA	protein_coding	NA	PCDHB12	-16.1	6.46	119	0.000169	0.00938	3.77
1	975000	982000	6890	-	ENSG00000187642	PERM1	NA	protein_coding	NA	PERM1	-15	5.44	119	0.000169	0.00938	3.77
1	1720000	1750000	21200	-	ENSG00000215790	SLC35E2A	NA	protein_coding	NA	SLC35E2A	-14.9	5.76	120	0.000169	0.00938	3.77
15	41200000	41300000	51000	+	ENSG00000187446	CHP1	NA	protein_coding	NA	CHP1	7.49	8.49	76.5	0.00017	0.00938	3.77
6	35800000	35800000	2360	-	ENSG00000137392	CLPS	NA	protein_coding	NA	CLPS	-14.6	5.49	119	0.000171	0.00938	3.77
10	99900000	100000000	134000	-	ENSG00000107554	DNMBP	NA	protein_coding	NA	DNMBP	-14	6.05	118	0.000172	0.00938	3.76
1	207000000	208000000	146000	+	ENSG00000203710	CR1	NA	protein_coding	NA	CR1	-15.6	6.82	118	0.000172	0.00938	3.76
1	231000000	231000000	59400	+	ENSG00000119283	TRIM67	NA	protein_coding	NA	TRIM67	-14.8	5.9	118	0.000173	0.00938	3.76
1	146000000	146000000	19300	-	ENSG00000198483	ANKRD35	NA	protein_coding	NA	ANKRD35	-14.9	5.9	118	0.000173	0.00938	3.76
6	148000000	148000000	229000	+	ENSG00000203727	SAMD5	NA	protein_coding	NA	SAMD5	-12.2	5.09	75.7	0.000174	0.00938	3.76
1	11800000	11800000	27800	+	ENSG00000215910	C1orf167	NA	protein_coding	NA	C1orf167	-14.6	5.53	118	0.000174	0.00938	3.76
2	27500000	27600000	45300	+	ENSG00000221843	C2orf16	NA	protein_coding	NA	C2orf16	-14.2	5.98	118	0.000174	0.00938	3.76
15	88800000	88900000	71900	+	ENSG00000157766	ACAN	NA	protein_coding	NA	ACAN	-15.1	6.68	118	0.000175	0.00938	3.76
6	43100000	43200000	85400	+	ENSG00000112655	PTK7	NA	protein_coding	NA	PTK7	-15.8	6.6	117	0.000176	0.00938	3.75
17	58000000	58000000	16700	-	ENSG00000136451	VEZF1	NA	protein_coding	NA	VEZF1	6.32	9.2	75.4	0.000176	0.00938	3.75
6	117000000	117000000	138000	-	ENSG00000047936	ROS1	NA	protein_coding	NA	ROS1	-13.9	5.59	117	0.000177	0.00938	3.75
1	43400000	43500000	64400	+	ENSG00000198198	SZT2	NA	protein_coding	NA	SZT2	-6.02	7.24	75.2	0.000177	0.00938	3.75
2	94800000	94900000	66200	-	ENSG00000229089	ANKRD20A8P	NA	transcribed_unprocessed_pseudogene	NA	ANKRD20A8P	-15	6.49	117	0.000177	0.00938	3.75
6	52400000	52500000	168000	+	ENSG00000096093	EFHC1	NA	protein_coding	NA	EFHC1	-7.95	5.72	75.1	0.000178	0.00938	3.75
8	26700000	26900000	119000	-	ENSG00000120907	ADRA1A	NA	protein_coding	NA	ADRA1A	-14.4	5.54	116	0.000179	0.00938	3.75
14	49600000	49600000	2680	+	ENSG00000168282	MGAT2	NA	protein_coding	NA	MGAT2	5.81	8.08	75	0.000179	0.00938	3.75
1	157000000	157000000	18100	+	ENSG00000132692	BCAN	NA	protein_coding	NA	BCAN	-14.1	5.76	116	0.000181	0.00938	3.74
10	87200000	87200000	11500	+	ENSG00000184923	NUTM2A	NA	protein_coding	NA	NUTM2A	-14.8	5.38	116	0.000181	0.00938	3.74
21	45100000	45200000	153000	+	ENSG00000197381	ADARB1	NA	protein_coding	NA	ADARB1	-12.1	6.25	74.6	0.000181	0.00938	3.74
20	21300000	21400000	86500	+	ENSG00000088930	XRN2	NA	protein_coding	NA	XRN2	6.42	10.9	74.4	0.000182	0.00938	3.74
7	3300000	4270000	968000	+	ENSG00000146555	SDK1	NA	protein_coding	NA	SDK1	-15.6	6.81	115	0.000182	0.00938	3.74
11	47500000	47600000	99600	-	ENSG00000149187	CELF1	NA	protein_coding	NA	CELF1	6.31	8.35	74.5	0.000182	0.00938	3.74
8	143000000	143000000	6610	-	ENSG00000180155	LYNX1	NA	protein_coding	NA	LYNX1	-15.2	6.24	116	0.000182	0.00938	3.74
1	157000000	157000000	22700	+	ENSG00000187800	PEAR1	NA	protein_coding	NA	PEAR1	-15	5.68	116	0.000182	0.00938	3.74
21	34100000	34100000	32700	+	ENSG00000198743	SLC5A3	NA	protein_coding	NA	SLC5A3	6.08	10.9	74.4	0.000182	0.00938	3.74
16	16400000	16400000	21300	+	ENSG00000227827	AC138969.2	NA	unprocessed_pseudogene	NA	AC138969.2	-15.4	6.47	116	0.000182	0.00938	3.74
1	26300000	26400000	38400	-	ENSG00000176092	CRYBG2	NA	protein_coding	NA	CRYBG2	-15.2	6.11	115	0.000183	0.00938	3.74
18	6940000	7120000	176000	-	ENSG00000101680	LAMA1	NA	protein_coding	NA	LAMA1	-14.2	5.67	115	0.000185	0.00938	3.73
2	101000000	101000000	177000	+	ENSG00000170485	NPAS2	NA	protein_coding	NA	NPAS2	-13	4.47	74	0.000185	0.00938	3.73
1	46900000	46900000	12300	-	ENSG00000187048	CYP4A11	NA	protein_coding	NA	CYP4A11	-14.5	5.62	115	0.000185	0.00938	3.73
1	216000000	216000000	801000	-	ENSG00000042781	USH2A	NA	protein_coding	NA	USH2A	-15.4	7.47	115	0.000186	0.00938	3.73
1	65400000	65600000	221000	+	ENSG00000116678	LEPR	NA	protein_coding	NA	LEPR	-13.8	5.83	114	0.000186	0.00938	3.73
4	145000000	145000000	31200	+	ENSG00000164163	ABCE1	NA	protein_coding	NA	ABCE1	6.51	9.13	73.9	0.000186	0.00938	3.73
4	17800000	18000000	181000	-	ENSG00000178177	LCORL	NA	protein_coding	NA	LCORL	5.88	8.34	73.8	0.000186	0.00938	3.73
12	46400000	46400000	14600	-	ENSG00000134294	SLC38A2	NA	protein_coding	NA	SLC38A2	9.85	10.7	73.6	0.000187	0.00938	3.73
19	18300000	18300000	17400	-	ENSG00000130518	IQCN	NA	protein_coding	NA	IQCN	-15.3	5.98	114	0.000188	0.00938	3.73
3	33100000	33100000	6730	-	ENSG00000188167	TMPPE	NA	protein_coding	NA	TMPPE	-15.1	6.07	114	0.000188	0.00938	3.73
17	18100000	18200000	71100	+	ENSG00000091536	MYO15A	NA	protein_coding	NA	MYO15A	-13.5	6.8	73.5	0.000189	0.00938	3.72
13	46000000	46100000	98300	-	ENSG00000123200	ZC3H13	NA	protein_coding	NA	ZC3H13	-7.46	6.99	73.4	0.000189	0.00938	3.72
19	8490000	8500000	12600	-	ENSG00000133246	PRAM1	NA	protein_coding	NA	PRAM1	-14.8	5.73	114	0.000189	0.00938	3.72
11	57300000	57300000	25300	-	ENSG00000149115	TNKS1BP1	NA	protein_coding	NA	TNKS1BP1	-15.9	6.23	114	0.000189	0.00938	3.72
8	1820000	1960000	135000	+	ENSG00000104728	ARHGEF10	NA	protein_coding	NA	ARHGEF10	-14.1	5.5	113	0.00019	0.00938	3.72
15	45100000	45200000	35600	+	ENSG00000137857	DUOX1	NA	protein_coding	NA	DUOX1	-14.5	5.94	113	0.00019	0.00938	3.72
4	959000	987000	28000	-	ENSG00000145214	DGKQ	NA	protein_coding	NA	DGKQ	-14.9	5.35	113	0.00019	0.00938	3.72
19	40800000	40900000	6910	-	ENSG00000255974	CYP2A6	NA	protein_coding	NA	CYP2A6	-15.1	5.79	113	0.000191	0.00938	3.72
13	77900000	78000000	80000	-	ENSG00000136160	EDNRB	NA	protein_coding	NA	EDNRB	-15	6.13	113	0.000192	0.00938	3.72
1	966000	976000	9380	+	ENSG00000187583	PLEKHN1	NA	protein_coding	NA	PLEKHN1	-14.4	5.63	113	0.000192	0.00938	3.72
X	154000000	154000000	15200	+	ENSG00000198753	PLXNB3	NA	protein_coding	NA	PLXNB3	-15.7	6.29	113	0.000192	0.00938	3.72
1	149000000	149000000	148000	-	ENSG00000270629	NBPF14	NA	protein_coding	NA	NBPF14	-15.3	7.4	113	0.000192	0.00938	3.72
5	66600000	67200000	573000	+	ENSG00000069020	MAST4	NA	protein_coding	NA	MAST4	-11.8	6.06	72.8	0.000193	0.00938	3.71
11	130000000	130000000	88200	-	ENSG00000196323	ZBTB44	NA	protein_coding	NA	ZBTB44	6.7	8.58	72.9	0.000193	0.00938	3.72
4	2940000	2960000	25500	-	ENSG00000087269	NOP14	NA	protein_coding	NA	NOP14	-12.3	5.51	72.7	0.000194	0.00938	3.71
13	57600000	57700000	97600	+	ENSG00000118946	PCDH17	NA	protein_coding	NA	PCDH17	-10.8	6.24	72.7	0.000194	0.00938	3.71
8	30800000	30900000	81500	-	ENSG00000133863	TEX15	NA	protein_coding	NA	TEX15	-14.5	6.51	112	0.000194	0.00938	3.71
3	101000000	101000000	244000	-	ENSG00000154175	ABI3BP	NA	protein_coding	NA	ABI3BP	-14.1	5.72	112	0.000194	0.00938	3.71
20	6040000	6050000	13500	-	ENSG00000125872	LRRN4	NA	protein_coding	NA	LRRN4	-14.7	5.97	112	0.000195	0.00938	3.71
7	48200000	48600000	476000	+	ENSG00000179869	ABCA13	NA	protein_coding	NA	ABCA13	-15.5	7.38	112	0.000195	0.00938	3.71
9	65300000	65300000	3110	-	ENSG00000204779	FOXD4L5	NA	protein_coding	NA	FOXD4L5	-15.7	6.28	112	0.000195	0.00938	3.71
19	58500000	58500000	8390	+	ENSG00000083812	ZNF324	NA	protein_coding	NA	ZNF324	-15	5.72	112	0.000196	0.00938	3.71
22	24200000	24200000	7620	+	ENSG00000099994	SUSD2	NA	protein_coding	NA	SUSD2	-14.7	5.65	112	0.000196	0.00938	3.71
5	141000000	141000000	3360	+	ENSG00000113205	PCDHB3	NA	protein_coding	NA	PCDHB3	-14.8	5.97	112	0.000196	0.00938	3.71
10	45800000	45900000	28300	-	ENSG00000188234	AGAP4	NA	protein_coding	NA	AGAP4	-16.2	7.81	112	0.000196	0.00938	3.71
2	171000000	171000000	240000	-	ENSG00000198586	TLK1	NA	protein_coding	NA	TLK1	5.96	9.05	72.3	0.000196	0.00938	3.71
8	143000000	144000000	104000	-	ENSG00000014164	ZC3H3	NA	protein_coding	NA	ZC3H3	-14.7	5.44	112	0.000197	0.00938	3.71
7	74000000	74100000	42100	+	ENSG00000049540	ELN	NA	protein_coding	NA	ELN	-14.7	5.52	112	0.000197	0.00938	3.71
20	59100000	59300000	136000	+	ENSG00000124203	ZNF831	NA	protein_coding	NA	ZNF831	-14.6	5.34	112	0.000197	0.00938	3.71
19	10100000	10200000	97900	-	ENSG00000130816	DNMT1	NA	protein_coding	NA	DNMT1	-15.3	6.12	112	0.000197	0.00938	3.71
15	82700000	82700000	50700	-	ENSG00000103723	AP3B2	NA	protein_coding	NA	AP3B2	-12.4	5.64	72	0.000199	0.00938	3.7
10	119000000	119000000	47200	-	ENSG00000107581	EIF3A	NA	protein_coding	NA	EIF3A	6.27	9.43	72	0.000199	0.00938	3.7
12	26100000	26100000	5010	-	ENSG00000123095	BHLHE41	NA	protein_coding	NA	BHLHE41	7.5	8.54	72	0.000199	0.00938	3.7
X	41100000	41200000	151000	+	ENSG00000124486	USP9X	NA	protein_coding	NA	USP9X	6.85	10.1	71.9	0.000199	0.00938	3.7
19	49500000	49500000	17800	+	ENSG00000161618	ALDH16A1	NA	protein_coding	NA	ALDH16A1	-13.2	5.5	72	0.000199	0.00938	3.7
15	20500000	20500000	9940	-	ENSG00000277322	GOLGA6L6	NA	protein_coding	NA	GOLGA6L6	-16.4	6.76	111	0.000199	0.00938	3.7
3	184000000	184000000	20900	+	ENSG00000114867	EIF4G1	NA	protein_coding	NA	EIF4G1	6.27	9.81	71.8	0.0002	0.00938	3.7
15	52200000	52300000	103000	-	ENSG00000128833	MYO5C	NA	protein_coding	NA	MYO5C	-14.2	5.91	111	0.0002	0.00938	3.7
19	156000	157000	937	-	ENSG00000266971	OR4F8P	NA	unprocessed_pseudogene	NA	OR4F8P	-14.6	5.71	111	0.0002	0.00938	3.7
19	1230000	1240000	9740	-	ENSG00000099625	CBARP	NA	protein_coding	NA	CBARP	-14.7	5.78	111	0.000201	0.00938	3.7
12	70500000	70600000	122000	-	ENSG00000127329	PTPRB	NA	protein_coding	NA	PTPRB	-14	5.59	111	0.000201	0.00938	3.7
9	84700000	85000000	359000	+	ENSG00000148053	NTRK2	NA	protein_coding	NA	NTRK2	-14.7	6.35	111	0.000201	0.00938	3.7
2	96100000	96100000	3700	-	ENSG00000274286	ADRA2B	NA	protein_coding	NA	ADRA2B	-14.7	5.52	111	0.000201	0.00938	3.7
20	2540000	2640000	105000	+	ENSG00000149488	TMC2	NA	protein_coding	NA	TMC2	-14.4	5.85	110	0.000202	0.00938	3.7
19	38300000	38400000	35200	+	ENSG00000099338	CATSPERG	NA	protein_coding	NA	CATSPERG	-14.3	5.61	110	0.000203	0.00938	3.69
6	158000000	158000000	245000	+	ENSG00000130340	SNX9	NA	protein_coding	NA	SNX9	7.11	10.8	71.5	0.000203	0.00938	3.69
8	145000000	145000000	35500	-	ENSG00000198169	ZNF251	NA	protein_coding	NA	ZNF251	-15	5.71	110	0.000203	0.00938	3.69
20	23000000	23000000	1430	+	ENSG00000132671	SSTR4	NA	protein_coding	NA	SSTR4	-14.7	5.49	110	0.000204	0.00938	3.69
16	58200000	58200000	40200	-	ENSG00000070770	CSNK2A2	NA	protein_coding	NA	CSNK2A2	6.22	8.79	71.1	0.000205	0.00938	3.69
X	91800000	92600000	844000	+	ENSG00000102290	PCDH11X	NA	protein_coding	NA	PCDH11X	-13.7	6.1	110	0.000205	0.00938	3.69
12	51200000	51300000	32600	+	ENSG00000183283	DAZAP2	NA	protein_coding	NA	DAZAP2	6.95	9.99	71.2	0.000205	0.00938	3.69
1	41000000	41000000	7640	-	ENSG00000171790	SLFNL1	NA	protein_coding	NA	SLFNL1	-14.8	5.56	109	0.000206	0.00938	3.69
9	137000000	137000000	116000	-	ENSG00000187609	EXD3	NA	protein_coding	NA	EXD3	-14.9	5.58	109	0.000206	0.00938	3.69
3	9950000	9950000	6870	-	ENSG00000163704	PRRT3	NA	protein_coding	NA	PRRT3	-15.1	6.08	109	0.000207	0.00938	3.68
2	68500000	68700000	188000	+	ENSG00000169621	APLF	NA	protein_coding	NA	APLF	-14	5.51	109	0.000207	0.00938	3.68
5	141000000	141000000	3970	+	ENSG00000113248	PCDHB15	NA	protein_coding	NA	PCDHB15	-14.9	5.95	109	0.000208	0.00938	3.68
4	1010000	1030000	17000	+	ENSG00000127418	FGFRL1	NA	protein_coding	NA	FGFRL1	-10.2	4.99	70.7	0.000209	0.00938	3.68
4	53300	88200	34900	+	ENSG00000272602	ZNF595	NA	protein_coding	NA	ZNF595	-10.9	5.43	70.6	0.000209	0.00938	3.68
1	3650000	3740000	83700	+	ENSG00000078900	TP73	NA	protein_coding	NA	TP73	-14.9	5.63	108	0.00021	0.00938	3.68
8	21900000	21900000	4820	-	ENSG00000147443	DOK2	NA	protein_coding	NA	DOK2	-14.7	5.62	108	0.00021	0.00938	3.68
9	130000000	130000000	168000	+	ENSG00000148357	HMCN2	NA	protein_coding	NA	HMCN2	-16.1	6.67	108	0.00021	0.00938	3.68
1	1170000	1200000	24100	+	ENSG00000162571	TTLL10	NA	protein_coding	NA	TTLL10	-15.2	6.14	108	0.00021	0.00938	3.68
7	76300000	76400000	32200	-	ENSG00000170027	YWHAG	NA	protein_coding	NA	YWHAG	5.6	10.5	70.5	0.00021	0.00938	3.68
1	144000000	144000000	3100	-	ENSG00000175658	DRD5P2	NA	processed_pseudogene	NA	DRD5P2	-14.7	5.76	108	0.00021	0.00938	3.68
3	37000000	37000000	8090	-	ENSG00000178567	EPM2AIP1	NA	protein_coding	NA	EPM2AIP1	-11.4	5.64	70.6	0.00021	0.00938	3.68
6	24700000	24700000	15100	-	ENSG00000112308	C6orf62	NA	protein_coding	NA	C6orf62	6.99	11.8	70.3	0.000212	0.00938	3.67
9	134000000	134000000	43400	+	ENSG00000197859	ADAMTSL2	NA	protein_coding	NA	ADAMTSL2	-14.6	5.44	108	0.000212	0.00938	3.67
14	73200000	73300000	37100	+	ENSG00000100767	PAPLN	NA	protein_coding	NA	PAPLN	-15.1	5.34	108	0.000213	0.00938	3.67
1	161000000	161000000	11700	-	ENSG00000158796	DEDD	NA	protein_coding	NA	DEDD	5.82	8.5	70.2	0.000213	0.00938	3.67
15	79000000	79100000	131000	-	ENSG00000058335	RASGRF1	NA	protein_coding	NA	RASGRF1	-15.3	6.79	108	0.000214	0.00938	3.67
1	228000000	228000000	52700	+	ENSG00000143740	SNAP47	NA	protein_coding	NA	SNAP47	-14.4	5.6	108	0.000214	0.00938	3.67
9	93200000	93300000	136000	+	ENSG00000165238	WNK2	NA	protein_coding	NA	WNK2	-10.3	6.31	70.1	0.000214	0.00938	3.67
3	38800000	39100000	206000	-	ENSG00000168356	SCN11A	NA	protein_coding	NA	SCN11A	-14.2	5.46	107	0.000214	0.00938	3.67
X	11100000	11700000	548000	-	ENSG00000047648	ARHGAP6	NA	protein_coding	NA	ARHGAP6	-14	5.42	107	0.000216	0.00938	3.66
5	150000000	150000000	42700	+	ENSG00000070814	TCOF1	NA	protein_coding	NA	TCOF1	-13.2	5.52	69.7	0.000216	0.00938	3.66
2	170000000	171000000	477000	+	ENSG00000071909	MYO3B	NA	protein_coding	NA	MYO3B	-11.3	5.13	69.8	0.000216	0.00938	3.67
16	69600000	69700000	140000	+	ENSG00000102908	NFAT5	NA	protein_coding	NA	NFAT5	6.8	11.8	69.8	0.000216	0.00938	3.67
17	4950000	4950000	3410	-	ENSG00000108518	PFN1	NA	protein_coding	NA	PFN1	9.18	9.53	107	0.000216	0.00938	3.67
1	85600000	85700000	59000	-	ENSG00000117174	ZNHIT6	NA	protein_coding	NA	ZNHIT6	-14.4	5.22	107	0.000216	0.00938	3.66
19	56600000	56600000	21400	+	ENSG00000197016	ZNF470	NA	protein_coding	NA	ZNF470	-14.5	5.27	107	0.000216	0.00938	3.67
13	46100000	46200000	86000	-	ENSG00000136167	LCP1	NA	protein_coding	NA	LCP1	5.59	10.1	69.7	0.000217	0.00938	3.66
6	37000000	37000000	23400	+	ENSG00000146192	FGD2	NA	protein_coding	NA	FGD2	-15.1	5.87	107	0.000217	0.00938	3.66
19	9960000	10000000	50900	-	ENSG00000080573	COL5A3	NA	protein_coding	NA	COL5A3	-15.3	5.8	107	0.000218	0.00938	3.66
14	100000000	100000000	44500	+	ENSG00000100811	YY1	NA	protein_coding	NA	YY1	8.62	10.6	69.6	0.000218	0.00938	3.66
1	165000000	165000000	44400	-	ENSG00000143171	RXRG	NA	protein_coding	NA	RXRG	-11.8	4.84	69.5	0.000218	0.00938	3.66
12	19400000	19700000	317000	+	ENSG00000139154	AEBP2	NA	protein_coding	NA	AEBP2	7.19	9.81	69.5	0.000219	0.00938	3.66
9	66100000	66200000	72700	-	ENSG00000276203	ANKRD20A3	NA	protein_coding	NA	ANKRD20A3	-15.6	6.44	106	0.000219	0.00938	3.66
16	29900000	29900000	28400	-	ENSG00000174938	SEZ6L2	NA	protein_coding	NA	SEZ6L2	-11	4.87	69.3	0.00022	0.00938	3.66
7	72600000	72800000	269000	-	ENSG00000277149	TYW1B	NA	protein_coding	NA	TYW1B	-13.5	5.45	106	0.00022	0.00938	3.66
1	183000000	183000000	58900	+	ENSG00000058085	LAMC2	NA	protein_coding	NA	LAMC2	-14.3	5.48	106	0.000221	0.00938	3.66
1	70200000	70300000	47400	+	ENSG00000116754	SRSF11	NA	protein_coding	NA	SRSF11	5.71	9.32	69.2	0.000221	0.00938	3.66
2	113000000	113000000	58500	+	ENSG00000136682	CBWD2	NA	protein_coding	NA	CBWD2	-14.3	5.71	106	0.000221	0.00938	3.66
1	184000000	184000000	108000	-	ENSG00000198756	COLGALT2	NA	protein_coding	NA	COLGALT2	-14	5.34	106	0.000221	0.00938	3.66
1	5860000	5990000	130000	-	ENSG00000131697	NPHP4	NA	protein_coding	NA	NPHP4	-14	5.47	106	0.000222	0.00938	3.65
19	47700000	47700000	29700	+	ENSG00000024422	EHD2	NA	protein_coding	NA	EHD2	-12.4	4.97	69	0.000223	0.00938	3.65
19	13800000	13800000	36800	+	ENSG00000132003	ZSWIM4	NA	protein_coding	NA	ZSWIM4	-14.8	5.57	106	0.000223	0.00938	3.65
10	68600000	68700000	134000	+	ENSG00000138336	TET1	NA	protein_coding	NA	TET1	-14.1	5.72	106	0.000223	0.00938	3.65
6	109000000	110000000	198000	-	ENSG00000155085	AK9	NA	protein_coding	NA	AK9	-14.1	5.83	106	0.000223	0.00938	3.65
1	25400000	25500000	69400	+	ENSG00000204178	MACO1	NA	protein_coding	NA	MACO1	5.94	7.42	69	0.000223	0.00938	3.65
16	30100000	30100000	9400	+	ENSG00000149923	PPP4C	NA	protein_coding	NA	PPP4C	6.06	8.18	68.9	0.000224	0.00938	3.65
8	123000000	123000000	193000	+	ENSG00000178764	ZHX2	NA	protein_coding	NA	ZHX2	-14.5	5.27	105	0.000224	0.00938	3.65
15	74000000	74000000	15700	-	ENSG00000067221	STOML1	NA	protein_coding	NA	STOML1	-13.6	4.51	68.7	0.000225	0.00938	3.65
6	131000000	131000000	148000	+	ENSG00000118507	AKAP7	NA	protein_coding	NA	AKAP7	-14	5.37	105	0.000225	0.00938	3.65
11	121000000	121000000	90300	+	ENSG00000109927	TECTA	NA	protein_coding	NA	TECTA	-14.9	6.08	105	0.000226	0.00938	3.65
8	17600000	17800000	157000	-	ENSG00000129422	MTUS1	NA	protein_coding	NA	MTUS1	-14.3	5.57	105	0.000227	0.00938	3.64
9	111000000	111000000	124000	-	ENSG00000136813	ECPAS	NA	protein_coding	NA	ECPAS	7.11	8.13	68.5	0.000227	0.00938	3.64
17	55400000	55400000	29300	-	ENSG00000108960	MMD	NA	protein_coding	NA	MMD	6.4	7.52	68.3	0.000229	0.00938	3.64
5	132000000	132000000	155000	-	ENSG00000217128	FNIP1	NA	protein_coding	NA	FNIP1	5.35	8.08	68.3	0.000229	0.00938	3.64
2	42800000	42800000	1780	-	ENSG00000162881	OXER1	NA	protein_coding	NA	OXER1	-14.4	5.2	104	0.00023	0.00938	3.64
4	103000000	103000000	74500	-	ENSG00000109332	UBE2D3	NA	protein_coding	NA	UBE2D3	6.9	11.4	68.1	0.000231	0.00938	3.64
1	200000000	200000000	5120	-	ENSG00000162702	ZNF281	NA	protein_coding	NA	ZNF281	5.5	8.98	68	0.000231	0.00938	3.64
13	30500000	30600000	161000	-	ENSG00000189403	HMGB1	NA	protein_coding	NA	HMGB1	7.83	9.87	68.1	0.000231	0.00938	3.64
12	63800000	64200000	318000	+	ENSG00000196935	SRGAP1	NA	protein_coding	NA	SRGAP1	-9.55	4.89	68	0.000231	0.00938	3.64
6	7540000	7590000	45100	+	ENSG00000096696	DSP	NA	protein_coding	NA	DSP	-7.27	6.19	67.9	0.000232	0.00938	3.63
2	136000000	136000000	49300	-	ENSG00000115850	LCT	NA	protein_coding	NA	LCT	-14.1	5.26	104	0.000232	0.00938	3.63
11	108000000	108000000	147000	+	ENSG00000149311	ATM	NA	protein_coding	NA	ATM	-7.42	5.81	68	0.000232	0.00938	3.64
1	20300000	20400000	64000	+	ENSG00000158816	VWA5B1	NA	protein_coding	NA	VWA5B1	-14.3	5.79	104	0.000232	0.00938	3.63
12	109000000	109000000	152000	+	ENSG00000076555	ACACB	NA	protein_coding	NA	ACACB	-13.8	5.49	104	0.000233	0.00938	3.63
11	47300000	47400000	21300	-	ENSG00000134571	MYBPC3	NA	protein_coding	NA	MYBPC3	-14.3	5.6	104	0.000233	0.00938	3.63
6	160000000	160000000	104000	+	ENSG00000146477	SLC22A3	NA	protein_coding	NA	SLC22A3	-13.5	5.39	104	0.000233	0.00938	3.63
8	6410000	6650000	242000	+	ENSG00000147316	MCPH1	NA	protein_coding	NA	MCPH1	-13.3	5.49	104	0.000233	0.00938	3.63
9	121000	179000	58100	-	ENSG00000172785	CBWD1	NA	protein_coding	NA	CBWD1	-14.3	5.98	103	0.000233	0.00938	3.63
20	32800000	32800000	47000	+	ENSG00000088305	DNMT3B	NA	protein_coding	NA	DNMT3B	-14.4	5.46	103	0.000234	0.00938	3.63
4	105000000	105000000	134000	+	ENSG00000168769	TET2	NA	protein_coding	NA	TET2	-14.1	5.61	103	0.000234	0.00938	3.63
1	157000000	157000000	17300	-	ENSG00000117036	ETV3	NA	protein_coding	NA	ETV3	6.59	9.2	67.6	0.000235	0.00938	3.63
3	9920000	9930000	16600	+	ENSG00000163702	IL17RC	NA	protein_coding	NA	IL17RC	-14.3	5.3	103	0.000235	0.00938	3.63
9	65700000	65700000	2230	+	ENSG00000184659	FOXD4L4	NA	protein_coding	NA	FOXD4L4	-8.19	7.11	67.5	0.000236	0.00938	3.63
15	52300000	52500000	222000	-	ENSG00000197535	MYO5A	NA	protein_coding	NA	MYO5A	5.83	9.59	67.5	0.000236	0.00938	3.63
12	62300000	62400000	157000	+	ENSG00000135655	USP15	NA	protein_coding	NA	USP15	5.8	8.25	67.4	0.000237	0.00938	3.62
4	3290000	3440000	147000	+	ENSG00000159788	RGS12	NA	protein_coding	NA	RGS12	-8.76	6.61	67.4	0.000237	0.00938	3.63
3	101000000	101000000	98000	-	ENSG00000081148	IMPG2	NA	protein_coding	NA	IMPG2	-13.7	5.36	103	0.000238	0.00938	3.62
22	46400000	46500000	176000	-	ENSG00000075275	CELSR1	NA	protein_coding	NA	CELSR1	-13.9	5.36	102	0.000239	0.00938	3.62
19	33600000	33800000	152000	+	ENSG00000124302	CHST8	NA	protein_coding	NA	CHST8	-14.5	5.33	102	0.00024	0.00938	3.62
10	87400000	87400000	13000	+	ENSG00000214562	NUTM2D	NA	protein_coding	NA	NUTM2D	-14.2	5.28	102	0.00024	0.00938	3.62
2	189000000	189000000	34100	+	ENSG00000115368	WDR75	NA	protein_coding	NA	WDR75	-14	5.84	102	0.000241	0.00938	3.62
1	2180000	2210000	28300	-	ENSG00000162585	FAAP20	NA	protein_coding	NA	FAAP20	-15.3	5.75	102	0.000241	0.00938	3.62
3	49900000	49900000	16900	-	ENSG00000164078	MST1R	NA	protein_coding	NA	MST1R	-14.3	5.5	102	0.000241	0.00938	3.62
1	232000000	232000000	414000	+	ENSG00000162946	DISC1	NA	protein_coding	NA	DISC1	-14.5	5.63	102	0.000242	0.00938	3.62
11	64900000	64900000	36700	-	ENSG00000110047	EHD1	NA	protein_coding	NA	EHD1	5.32	8.97	66.7	0.000243	0.00938	3.61
9	41900000	42100000	239000	-	ENSG00000154529	CNTNAP3B	NA	protein_coding	NA	CNTNAP3B	-15.1	6.39	102	0.000243	0.00938	3.61
8	12100000	12100000	11100	+	ENSG00000215343	ZNF705D	NA	protein_coding	NA	ZNF705D	-14.3	5.35	102	0.000243	0.00938	3.61
X	155000000	155000000	191000	-	ENSG00000185010	F8	NA	protein_coding	NA	F8	-14.2	5.61	101	0.000244	0.00938	3.61
21	46100000	46100000	34800	+	ENSG00000142173	COL6A2	NA	protein_coding	NA	COL6A2	-15.3	6.58	101	0.000245	0.00938	3.61
3	183000000	183000000	47900	-	ENSG00000043093	DCUN1D1	NA	protein_coding	NA	DCUN1D1	7.76	9.79	66.4	0.000246	0.00938	3.61
Y	10200000	10200000	152	+	ENSG00000251705	RNA5-8SP6	NA	rRNA_pseudogene	NA	RNA5-8SP6	8.59	8.6	101	0.000246	0.00938	3.61
9	470000	746000	276000	+	ENSG00000107104	KANK1	NA	protein_coding	NA	KANK1	-7.88	5.77	66.4	0.000247	0.00938	3.61
19	52800000	52900000	52400	-	ENSG00000204604	ZNF468	NA	protein_coding	NA	ZNF468	-12.3	5.42	66.4	0.000247	0.00938	3.61
10	126000000	126000000	1080	-	ENSG00000214297	ALDOAP2	NA	processed_pseudogene	NA	ALDOAP2	19.3	9.94	201	0.000247	0.00938	3.61
16	66700000	66800000	30700	-	ENSG00000135720	DYNC1LI2	NA	protein_coding	NA	DYNC1LI2	7.73	8.84	66.2	0.000248	0.00938	3.6
7	139000000	139000000	107000	-	ENSG00000157703	SVOPL	NA	protein_coding	NA	SVOPL	-13.7	5.35	101	0.000248	0.00938	3.6
19	11400000	11400000	15200	-	ENSG00000198003	CCDC151	NA	protein_coding	NA	CCDC151	-14.4	5.75	101	0.000248	0.00938	3.61
7	44100000	44100000	10200	+	ENSG00000106624	AEBP1	NA	protein_coding	NA	AEBP1	-14.4	5.87	101	0.000249	0.00938	3.6
11	33400000	33700000	298000	+	ENSG00000110427	KIAA1549L	NA	protein_coding	NA	KIAA1549L	-13.8	5.33	100	0.000249	0.00938	3.6
2	174000000	174000000	176000	-	ENSG00000138430	OLA1	NA	protein_coding	NA	OLA1	7.3	10.2	66.1	0.000249	0.00938	3.6
10	73700000	73700000	23900	-	ENSG00000172650	AGAP5	NA	protein_coding	NA	AGAP5	-15.6	7.3	100	0.000249	0.00938	3.6
6	49600000	49600000	11300	+	ENSG00000197261	C6orf141	NA	protein_coding	NA	C6orf141	-14.4	5.16	101	0.000249	0.00938	3.6
1	65400000	65400000	15400	+	ENSG00000213625	LEPROT	NA	protein_coding	NA	LEPROT	-13.9	5.51	100	0.000249	0.00938	3.6
7	64900000	64900000	60800	+	ENSG00000198039	ZNF273	NA	protein_coding	NA	ZNF273	-14.2	5.55	100	0.00025	0.00938	3.6
10	16800000	17100000	306000	-	ENSG00000107611	CUBN	NA	protein_coding	NA	CUBN	-14	6.26	100	0.000251	0.00938	3.6
19	12800000	12800000	9950	-	ENSG00000132026	RTBDN	NA	protein_coding	NA	RTBDN	-14.4	5.19	100	0.000251	0.00938	3.6
2	166000000	166000000	181000	-	ENSG00000169432	SCN9A	NA	protein_coding	NA	SCN9A	-13.8	5.45	100	0.000251	0.00938	3.6
1	161000000	161000000	6270	+	ENSG00000143258	USP21	NA	protein_coding	NA	USP21	6.36	9.09	65.9	0.000252	0.00938	3.6
6	42700000	42700000	1610	-	ENSG00000124659	TBCC	NA	protein_coding	NA	TBCC	-15.4	5.76	99.8	0.000253	0.00938	3.6
1	3450000	3480000	26400	+	ENSG00000130762	ARHGEF16	NA	protein_coding	NA	ARHGEF16	-14.6	5.73	99.9	0.000253	0.00938	3.6
1	16600000	16700000	4670	+	ENSG00000186301	MST1P2	NA	unprocessed_pseudogene	NA	MST1P2	-13.9	5.35	99.5	0.000254	0.00938	3.59
12	101000000	101000000	107000	+	ENSG00000120800	UTP20	NA	protein_coding	NA	UTP20	-14.2	5.76	99.5	0.000255	0.00938	3.59
4	9270000	9270000	1950	+	ENSG00000248933	USP17L22	NA	protein_coding	NA	USP17L22	-14.4	5.58	99.5	0.000255	0.00938	3.59
2	97500000	97600000	97300	-	ENSG00000196912	ANKRD36B	NA	protein_coding	NA	ANKRD36B	-13.6	5.56	99.2	0.000256	0.00938	3.59
X	71000000	71000000	330	+	ENSG00000230629	RPS23P8	NA	processed_pseudogene	NA	RPS23P8	19	9.64	197	0.000256	0.00938	3.59
19	57600000	57600000	12800	+	ENSG00000183647	ZNF530	NA	protein_coding	NA	ZNF530	-14.2	5.14	99.1	0.000257	0.00938	3.59
7	144000000	144000000	14500	-	ENSG00000204959	ARHGEF34P	NA	unprocessed_pseudogene	NA	ARHGEF34P	-14.8	6.16	99.2	0.000257	0.00938	3.59
7	4800000	4880000	86700	-	ENSG00000157927	RADIL	NA	protein_coding	NA	RADIL	-15.3	6.37	98.9	0.000258	0.00938	3.59
8	143000000	143000000	15300	+	ENSG00000158106	RHPN1	NA	protein_coding	NA	RHPN1	-14.6	5.35	98.9	0.000258	0.00938	3.59
2	227000000	228000000	89100	+	ENSG00000173744	AGFG1	NA	protein_coding	NA	AGFG1	5.59	8.85	65.3	0.000258	0.00938	3.59
19	45400000	45400000	26700	-	ENSG00000104881	PPP1R13L	NA	protein_coding	NA	PPP1R13L	-13.6	5.79	65.1	0.000259	0.00938	3.59
5	75100000	75200000	169000	-	ENSG00000145700	ANKRD31	NA	protein_coding	NA	ANKRD31	-13.6	5.26	98.8	0.000259	0.00938	3.59
17	69100000	69200000	97600	-	ENSG00000154263	ABCA10	NA	protein_coding	NA	ABCA10	-13	5.42	98.8	0.000259	0.00938	3.59
11	2400000	2420000	18500	-	ENSG00000070985	TRPM5	NA	protein_coding	NA	TRPM5	-14.9	5.64	98.5	0.00026	0.00938	3.58
19	40400000	40400000	19600	-	ENSG00000105227	PRX	NA	protein_coding	NA	PRX	-15.6	6.4	98.5	0.00026	0.00938	3.58
15	25300000	25400000	105000	-	ENSG00000114062	UBE3A	NA	protein_coding	NA	UBE3A	6.04	9.69	65.1	0.00026	0.00938	3.59
19	4820000	4830000	15800	-	ENSG00000127666	TICAM1	NA	protein_coding	NA	TICAM1	-14.8	5.87	98.5	0.00026	0.00938	3.58
19	40300000	40300000	29000	-	ENSG00000160392	C19orf47	NA	protein_coding	NA	C19orf47	-14.4	5.68	98.6	0.00026	0.00938	3.59
1	115000000	115000000	41800	-	ENSG00000009307	CSDE1	NA	protein_coding	NA	CSDE1	7.34	12.1	64.9	0.000262	0.00938	3.58
16	788000	801000	12700	+	ENSG00000127586	CHTF18	NA	protein_coding	NA	CHTF18	-15.1	5.88	98.3	0.000262	0.00938	3.58
4	39400000	39500000	44600	+	ENSG00000134962	KLB	NA	protein_coding	NA	KLB	-14.3	5.1	98.3	0.000262	0.00938	3.58
1	223000000	223000000	134000	+	ENSG00000154309	DISP1	NA	protein_coding	NA	DISP1	-14.3	5.3	98.3	0.000262	0.00938	3.58
7	103000000	103000000	262000	-	ENSG00000161040	FBXL13	NA	protein_coding	NA	FBXL13	-14	5.43	98.3	0.000262	0.00938	3.58
15	75200000	75200000	16500	+	ENSG00000167173	C15orf39	NA	protein_coding	NA	C15orf39	-14.6	5.34	98.2	0.000262	0.00938	3.58
19	3710000	3750000	42500	+	ENSG00000105289	TJP3	NA	protein_coding	NA	TJP3	-14.1	5.49	98.1	0.000263	0.00938	3.58
3	136000000	137000000	416000	-	ENSG00000118007	STAG1	NA	protein_coding	NA	STAG1	5.48	8.77	64.7	0.000263	0.00938	3.58
6	44200000	44200000	25600	+	ENSG00000137225	CAPN11	NA	protein_coding	NA	CAPN11	-14.5	5.69	98.2	0.000263	0.00938	3.58
10	18100000	18500000	403000	+	ENSG00000165995	CACNB2	NA	protein_coding	NA	CACNB2	-11.8	4.41	64.8	0.000263	0.00938	3.58
19	58100000	58100000	27100	+	ENSG00000176293	ZNF135	NA	protein_coding	NA	ZNF135	-14	5.18	97.9	0.000264	0.00938	3.58
9	92900000	92900000	17000	+	ENSG00000226668	AL136981.1	NA	transcribed_unprocessed_pseudogene	NA	AL136981.1	-14.2	5.44	98	0.000264	0.00938	3.58
3	50300000	50300000	9990	+	ENSG00000012171	SEMA3B	NA	protein_coding	NA	SEMA3B	-15.4	6.25	97.8	0.000265	0.00938	3.58
16	1490000	1510000	17100	+	ENSG00000100726	TELO2	NA	protein_coding	NA	TELO2	-14.2	5.47	97.8	0.000265	0.00938	3.58
1	245000000	246000000	554000	+	ENSG00000162849	KIF26B	NA	protein_coding	NA	KIF26B	-14.5	5.26	97.8	0.000265	0.00938	3.58
17	49800000	49800000	46300	+	ENSG00000136504	KAT7	NA	protein_coding	NA	KAT7	6.57	8.59	64.5	0.000266	0.00938	3.58
16	57600000	57700000	54900	+	ENSG00000205336	ADGRG1	NA	protein_coding	NA	ADGRG1	-14.3	5.16	97.7	0.000266	0.00938	3.58
2	170000000	170000000	20100	+	ENSG00000138385	SSB	NA	protein_coding	NA	SSB	-11.1	4.96	64.4	0.000267	0.00938	3.57
1	54000000	54100000	26800	-	ENSG00000116209	TMEM59	NA	protein_coding	NA	TMEM59	7.47	8.55	64.3	0.000268	0.00938	3.57
6	71900000	72400000	516000	+	ENSG00000079841	RIMS1	NA	protein_coding	NA	RIMS1	-12	5.92	64.2	0.000269	0.00938	3.57
19	35300000	35300000	21700	+	ENSG00000105695	MAG	NA	protein_coding	NA	MAG	-14.8	5.49	97.1	0.000269	0.00938	3.57
6	119000000	119000000	190000	-	ENSG00000111879	FAM184A	NA	protein_coding	NA	FAM184A	-12.9	5.36	97.1	0.000269	0.00938	3.57
19	42800000	42900000	103000	-	ENSG00000124467	PSG8	NA	protein_coding	NA	PSG8	-13.6	5.55	97	0.000269	0.00938	3.57
1	155000000	155000000	15600	-	ENSG00000176444	CLK2	NA	protein_coding	NA	CLK2	18.2	8.81	192	0.000269	0.00938	3.57
1	197000000	197000000	95600	+	ENSG00000000971	CFH	NA	protein_coding	NA	CFH	-12.9	5.41	97	0.00027	0.00938	3.57
16	649000	668000	18500	+	ENSG00000161996	WDR90	NA	protein_coding	NA	WDR90	-14.7	5.93	96.9	0.00027	0.00938	3.57
13	72800000	72800000	29900	-	ENSG00000083520	DIS3	NA	protein_coding	NA	DIS3	-14.1	5.44	96.8	0.000271	0.00938	3.57
13	95000000	95300000	282000	-	ENSG00000125257	ABCC4	NA	protein_coding	NA	ABCC4	-14.3	6.09	96.8	0.000271	0.00938	3.57
1	24000000	24000000	16600	-	ENSG00000188529	SRSF10	NA	protein_coding	NA	SRSF10	6.23	10.1	64	0.000271	0.00938	3.57
8	117000000	117000000	125000	-	ENSG00000147677	EIF3H	NA	protein_coding	NA	EIF3H	6.1	10.4	64	0.000272	0.00938	3.57
10	53800000	55600000	1830000	-	ENSG00000150275	PCDH15	NA	protein_coding	NA	PCDH15	-13.9	5.25	96.7	0.000272	0.00938	3.57
19	35100000	35100000	17900	-	ENSG00000153902	LGI4	NA	protein_coding	NA	LGI4	-12.5	4.87	64	0.000272	0.00938	3.57
16	2280000	2340000	64900	-	ENSG00000167972	ABCA3	NA	protein_coding	NA	ABCA3	-6.75	5.73	63.9	0.000272	0.00938	3.57
1	154000000	154000000	12300	+	ENSG00000160679	CHTOP	NA	protein_coding	NA	CHTOP	7.45	9.93	63.8	0.000273	0.00938	3.56
3	49000000	49000000	6810	-	ENSG00000178149	DALRD3	NA	protein_coding	NA	DALRD3	-13.8	5.2	96.5	0.000273	0.00938	3.56
16	14900000	15000000	29300	+	ENSG00000183426	NPIPA1	NA	protein_coding	NA	NPIPA1	-14.5	6.95	63.9	0.000273	0.00938	3.56
1	11500000	11500000	58400	+	ENSG00000204624	DISP3	NA	protein_coding	NA	DISP3	-13.2	6.61	63.9	0.000273	0.00938	3.56
2	15900000	15900000	6460	+	ENSG00000134323	MYCN	NA	protein_coding	NA	MYCN	7.69	10.5	63.8	0.000274	0.00938	3.56
12	132000000	132000000	23400	+	ENSG00000198598	MMP17	NA	protein_coding	NA	MMP17	-14.1	5.11	96.3	0.000274	0.00938	3.56
2	70100000	70100000	1730	+	ENSG00000169564	PCBP1	NA	protein_coding	NA	PCBP1	8.66	11.7	63.7	0.000275	0.00938	3.56
15	34400000	34400000	58400	-	ENSG00000175265	GOLGA8A	NA	protein_coding	NA	GOLGA8A	-14.1	5.21	96.2	0.000275	0.00938	3.56
12	45200000	45400000	224000	+	ENSG00000177119	ANO6	NA	protein_coding	NA	ANO6	-14.2	5.14	96.2	0.000275	0.00938	3.56
12	50300000	50400000	70400	-	ENSG00000185958	FAM186A	NA	protein_coding	NA	FAM186A	-15.1	6.28	96.1	0.000275	0.00938	3.56
17	1340000	1400000	55900	-	ENSG00000108953	YWHAE	NA	protein_coding	NA	YWHAE	8.98	11.4	96	0.000276	0.00938	3.56
2	113000000	113000000	35200	+	ENSG00000125630	POLR1B	NA	protein_coding	NA	POLR1B	-14	5.61	96	0.000276	0.00938	3.56
15	83700000	84000000	386000	+	ENSG00000156218	ADAMTSL3	NA	protein_coding	NA	ADAMTSL3	-13.8	6.15	96	0.000276	0.00938	3.56
19	3220000	3300000	72400	+	ENSG00000161082	CELF5	NA	protein_coding	NA	CELF5	-10	4.86	63.5	0.000277	0.00938	3.56
18	46100000	46100000	24100	-	ENSG00000152234	ATP5F1A	NA	protein_coding	NA	ATP5F1A	5.47	10.4	63.4	0.000278	0.00938	3.56
1	227000000	227000000	90000	+	ENSG00000163050	COQ8A	NA	protein_coding	NA	COQ8A	-14.7	5.16	95.6	0.000278	0.00938	3.56
3	19900000	19900000	67600	-	ENSG00000163576	EFHB	NA	protein_coding	NA	EFHB	-13.8	5.2	95.7	0.000278	0.00938	3.56
1	43200000	43300000	82200	+	ENSG00000243710	CFAP57	NA	protein_coding	NA	CFAP57	-13.7	5.9	95.7	0.000278	0.00938	3.56
13	37100000	37100000	2410	-	ENSG00000180138	CSNK1A1L	NA	protein_coding	NA	CSNK1A1L	5.68	7.5	63.3	0.000279	0.00938	3.55
19	7870000	7870000	5670	-	ENSG00000183248	PRR36	NA	protein_coding	NA	PRR36	-15.3	6.45	95.6	0.000279	0.00938	3.55
10	99800000	99900000	70000	+	ENSG00000023839	ABCC2	NA	protein_coding	NA	ABCC2	-13.7	5.55	95.3	0.00028	0.00938	3.55
15	80800000	81000000	172000	+	ENSG00000103888	CEMIP	NA	protein_coding	NA	CEMIP	-14.8	6.26	95.4	0.00028	0.00938	3.55
1	224000000	224000000	51900	-	ENSG00000162923	WDR26	NA	protein_coding	NA	WDR26	6.81	10.8	63.3	0.00028	0.00938	3.55
2	36700000	36800000	118000	+	ENSG00000205221	VIT	NA	protein_coding	NA	VIT	-13.9	5.44	95.4	0.00028	0.00938	3.55
19	47800000	47800000	17800	-	ENSG00000178928	TPRX1	NA	protein_coding	NA	TPRX1	-14.4	5.06	95.2	0.000281	0.00938	3.55
16	1970000	1980000	10900	+	ENSG00000183751	TBL3	NA	protein_coding	NA	TBL3	-14.5	5.3	95.3	0.000281	0.00938	3.55
19	2290000	2290000	2240	-	ENSG00000220008	LINGO3	NA	protein_coding	NA	LINGO3	-14.3	5.09	95.2	0.000281	0.00938	3.55
1	201000000	201000000	69300	-	ENSG00000118193	KIF14	NA	protein_coding	NA	KIF14	-13.5	5.33	95.1	0.000282	0.00938	3.55
15	54000000	54600000	655000	+	ENSG00000137766	UNC13C	NA	protein_coding	NA	UNC13C	-12.9	5.89	95.1	0.000282	0.00938	3.55
3	12500000	12500000	55200	+	ENSG00000154743	TSEN2	NA	protein_coding	NA	TSEN2	-13.2	5.45	95.2	0.000282	0.00938	3.55
2	187000000	187000000	21700	-	ENSG00000163012	ZSWIM2	NA	protein_coding	NA	ZSWIM2	-13.8	5.06	95.1	0.000282	0.00938	3.55
8	23400000	23500000	71900	-	ENSG00000197217	ENTPD4	NA	protein_coding	NA	ENTPD4	-13.6	5.54	95.1	0.000282	0.00938	3.55
1	120000000	120000000	189000	-	ENSG00000134250	NOTCH2	NA	protein_coding	NA	NOTCH2	-7.39	6.74	63	0.000283	0.00938	3.55
19	15600000	15700000	21900	+	ENSG00000186529	CYP4F3	NA	protein_coding	NA	CYP4F3	-14	5.06	94.9	0.000283	0.00938	3.55
5	13700000	13900000	254000	-	ENSG00000039139	DNAH5	NA	protein_coding	NA	DNAH5	-14.4	6	94.8	0.000284	0.00938	3.55
6	30700000	30700000	17600	-	ENSG00000137337	MDC1	NA	protein_coding	NA	MDC1	-15.1	5.84	94.8	0.000284	0.00938	3.55
4	118000000	119000000	86500	+	ENSG00000154608	CEP170P1	NA	transcribed_unprocessed_pseudogene	NA	CEP170P1	-11.4	4.71	62.8	0.000285	0.00938	3.54
1	18800000	18900000	20100	-	ENSG00000179002	TAS1R2	NA	protein_coding	NA	TAS1R2	-14.9	5.82	94.6	0.000285	0.00938	3.55
16	71900000	72000000	70400	-	ENSG00000277481	PKD1L3	NA	protein_coding	NA	PKD1L3	-13.3	5.28	94.6	0.000285	0.00938	3.54
19	1380000	1400000	12100	+	ENSG00000115286	NDUFS7	NA	protein_coding	NA	NDUFS7	-15	5.26	94.5	0.000286	0.00938	3.54
6	54300000	54400000	82300	+	ENSG00000137251	TINAG	NA	protein_coding	NA	TINAG	-13.5	5.09	94.3	0.000287	0.00938	3.54
19	4680000	4720000	49400	-	ENSG00000142002	DPP9	NA	protein_coding	NA	DPP9	-14.7	5.59	94.3	0.000287	0.00938	3.54
1	154000000	154000000	162000	-	ENSG00000143552	NUP210L	NA	protein_coding	NA	NUP210L	-13.8	5.46	94.3	0.000287	0.00938	3.54
1	2430000	2510000	79600	+	ENSG00000149527	PLCH2	NA	protein_coding	NA	PLCH2	-14.7	5.29	94.2	0.000288	0.00938	3.54
7	94900000	95300000	389000	+	ENSG00000158528	PPP1R9A	NA	protein_coding	NA	PPP1R9A	-12.6	5.5	94.2	0.000288	0.00938	3.54
3	39400000	39400000	1380	+	ENSG00000223668	EEF1A1P24	NA	processed_pseudogene	NA	EEF1A1P24	21.8	12.4	185	0.000288	0.00938	3.54
3	14800000	14900000	124000	+	ENSG00000154783	FGD5	NA	protein_coding	NA	FGD5	-15.3	6.1	94	0.000289	0.00938	3.54
3	131000000	131000000	118000	+	ENSG00000206384	COL6A6	NA	protein_coding	NA	COL6A6	-13.9	5.27	94.1	0.000289	0.00938	3.54
19	35400000	35400000	1880	+	ENSG00000268222	EEF1A1P7	NA	processed_pseudogene	NA	EEF1A1P7	15.5	9.92	94	0.000289	0.00938	3.54
15	43200000	43300000	34300	-	ENSG00000104055	TGM5	NA	protein_coding	NA	TGM5	-14	5.11	93.8	0.00029	0.00938	3.54
19	48800000	48800000	16000	-	ENSG00000105552	BCAT2	NA	protein_coding	NA	BCAT2	-14.7	5.19	93.9	0.00029	0.00938	3.54
9	76600000	76900000	295000	-	ENSG00000106772	PRUNE2	NA	protein_coding	NA	PRUNE2	-13.8	5.52	93.9	0.00029	0.00938	3.54
2	233000000	233000000	33000	+	ENSG00000135930	EIF4E2	NA	protein_coding	NA	EIF4E2	5.42	9.53	62.4	0.00029	0.00938	3.54
19	45100000	45100000	5090	-	ENSG00000170684	ZNF296	NA	protein_coding	NA	ZNF296	-14.4	5.07	93.9	0.00029	0.00938	3.54
19	17700000	17700000	15300	+	ENSG00000130479	MAP1S	NA	protein_coding	NA	MAP1S	-14.4	5.53	93.7	0.000291	0.00938	3.54
9	124000000	124000000	62000	-	ENSG00000136930	PSMB7	NA	protein_coding	NA	PSMB7	6.12	7.63	62.3	0.000291	0.00938	3.54
9	26900000	26900000	43900	-	ENSG00000137055	PLAA	NA	protein_coding	NA	PLAA	6.97	7.93	62.3	0.000291	0.00938	3.54
3	10200000	10300000	33200	+	ENSG00000157014	TATDN2	NA	protein_coding	NA	TATDN2	-13.7	5.21	93.8	0.000291	0.00938	3.54
3	3800000	3850000	50400	+	ENSG00000175928	LRRN1	NA	protein_coding	NA	LRRN1	-12.9	5.27	93.7	0.000291	0.00938	3.54
12	62800000	62800000	1010	+	ENSG00000213352	GAPDHP44	NA	processed_pseudogene	NA	GAPDHP44	17.2	7.79	184	0.000291	0.00938	3.54
7	45000000	45100000	77000	+	ENSG00000136280	CCM2	NA	protein_coding	NA	CCM2	6.2	6.39	62.3	0.000292	0.00938	3.54
3	23900000	23900000	7830	+	ENSG00000174748	RPL15	NA	protein_coding	NA	RPL15	10.4	12.4	62.3	0.000292	0.00938	3.54
18	9910000	9960000	46000	+	ENSG00000101558	VAPA	NA	protein_coding	NA	VAPA	7.29	8.98	62.2	0.000293	0.00938	3.53
3	39100000	39100000	31200	+	ENSG00000168026	TTC21A	NA	protein_coding	NA	TTC21A	-10.7	4.59	62.2	0.000293	0.00938	3.53
1	39600000	39600000	16000	-	ENSG00000090621	PABPC4	NA	protein_coding	NA	PABPC4	5.2	7.85	62.1	0.000294	0.00938	3.53
19	6470000	6480000	15400	-	ENSG00000205744	DENND1C	NA	protein_coding	NA	DENND1C	-15	5.37	93.3	0.000294	0.00938	3.53
2	160000000	160000000	101000	-	ENSG00000054219	LY75	NA	protein_coding	NA	LY75	-13.9	5.72	93.1	0.000295	0.00938	3.53
15	74100000	74100000	12700	-	ENSG00000159289	GOLGA6A	NA	protein_coding	NA	GOLGA6A	-15	6.15	93.2	0.000295	0.00938	3.53
10	28500000	28600000	90600	+	ENSG00000095787	WAC	NA	protein_coding	NA	WAC	6.14	10.2	61.8	0.000297	0.00938	3.53
2	187000000	187000000	71900	+	ENSG00000144369	FAM171B	NA	protein_coding	NA	FAM171B	-12.7	5.24	61.9	0.000297	0.00938	3.53
4	99600000	99700000	18100	-	ENSG00000248713	C4orf54	NA	protein_coding	NA	C4orf54	-12.2	5.23	61.8	0.000297	0.00938	3.53
6	44300000	44300000	19000	-	ENSG00000146221	TCTE1	NA	protein_coding	NA	TCTE1	-9.89	4.65	61.8	0.000298	0.00938	3.53
10	100000000	101000000	33200	-	ENSG00000075826	SEC31B	NA	protein_coding	NA	SEC31B	-13.4	5.18	92.6	0.000299	0.00938	3.52
17	10400000	10400000	31600	-	ENSG00000133020	MYH8	NA	protein_coding	NA	MYH8	-14.1	5.45	92.6	0.000299	0.00938	3.52
X	13000000	13000000	2120	+	ENSG00000205542	TMSB4X	NA	protein_coding	NA	TMSB4X	5.23	8.09	61.7	0.000299	0.00938	3.52
11	58600000	58600000	45500	+	ENSG00000255073	ZFP91-CNTF	NA	protein_coding	NA	ZFP91-CNTF	5.86	9.42	61.7	0.000299	0.00938	3.52
1	245000000	245000000	23900	-	ENSG00000153187	HNRNPU	NA	protein_coding	NA	HNRNPU	6.86	10.4	61.6	0.0003	0.00938	3.52
5	135000000	135000000	96400	+	ENSG00000145833	DDX46	NA	protein_coding	NA	DDX46	5.1	8.98	61.5	0.000301	0.00938	3.52
5	96900000	96900000	43800	+	ENSG00000164308	ERAP2	NA	protein_coding	NA	ERAP2	-11.5	5.43	61.5	0.000301	0.00938	3.52
12	95100000	95200000	141000	-	ENSG00000180263	FGD6	NA	protein_coding	NA	FGD6	-11.8	4.81	61.6	0.000301	0.00938	3.52
17	2590000	2690000	92400	+	ENSG00000007168	PAFAH1B1	NA	protein_coding	NA	PAFAH1B1	6.96	9.63	61.4	0.000303	0.00938	3.52
4	1710000	1750000	32300	+	ENSG00000013810	TACC3	NA	protein_coding	NA	TACC3	-14.4	4.86	92.1	0.000303	0.00938	3.52
19	22600000	22700000	33300	+	ENSG00000229676	ZNF492	NA	protein_coding	NA	ZNF492	-13.8	5.28	92.1	0.000303	0.00938	3.52
1	201000000	201000000	72900	-	ENSG00000081248	CACNA1S	NA	protein_coding	NA	CACNA1S	-14	5.22	92	0.000304	0.00938	3.52
1	84100000	84200000	160000	+	ENSG00000142875	PRKACB	NA	protein_coding	NA	PRKACB	-11.7	5.16	61.3	0.000304	0.00938	3.52
16	15000000	15100000	18200	-	ENSG00000157045	NTAN1	NA	protein_coding	NA	NTAN1	14.3	4.88	92	0.000304	0.00938	3.52
5	32400000	32400000	90400	-	ENSG00000056097	ZFR	NA	protein_coding	NA	ZFR	7.31	10.2	61.2	0.000305	0.00938	3.52
12	70200000	70400000	112000	+	ENSG00000111596	CNOT2	NA	protein_coding	NA	CNOT2	7.05	10.5	61.2	0.000305	0.00938	3.52
3	13500000	13600000	89300	+	ENSG00000163520	FBLN2	NA	protein_coding	NA	FBLN2	-15.6	5.93	91.8	0.000305	0.00938	3.52
14	24400000	24400000	20300	+	ENSG00000205978	NYNRIN	NA	protein_coding	NA	NYNRIN	-14.1	5.14	91.9	0.000305	0.00938	3.52
15	22500000	22500000	10300	+	ENSG00000277865	GOLGA6L22	NA	protein_coding	NA	GOLGA6L22	-15.9	6.25	91.8	0.000305	0.00938	3.52
17	18200000	18200000	26900	+	ENSG00000091542	ALKBH5	NA	protein_coding	NA	ALKBH5	7.23	9.58	61.1	0.000306	0.00938	3.51
2	113000000	113000000	52100	+	ENSG00000125637	PSD4	NA	protein_coding	NA	PSD4	-13.8	5.14	91.7	0.000306	0.00938	3.51
2	230000000	230000000	159000	-	ENSG00000153827	TRIP12	NA	protein_coding	NA	TRIP12	6.3	12	61.2	0.000306	0.00938	3.51
17	69000000	69100000	86500	-	ENSG00000154258	ABCA9	NA	protein_coding	NA	ABCA9	-11.2	5.28	61.2	0.000306	0.00938	3.51
15	76100000	76200000	169000	+	ENSG00000169758	TMEM266	NA	protein_coding	NA	TMEM266	-14	4.91	91.6	0.000306	0.00938	3.51
20	25200000	25200000	32400	+	ENSG00000197586	ENTPD6	NA	protein_coding	NA	ENTPD6	-13.9	5.09	91.7	0.000306	0.00938	3.51
14	21200000	21300000	60400	-	ENSG00000092199	HNRNPC	NA	protein_coding	NA	HNRNPC	8.41	10.8	61	0.000307	0.00938	3.51
6	112000000	112000000	51500	-	ENSG00000056972	TRAF3IP2	NA	protein_coding	NA	TRAF3IP2	5.73	7.13	61	0.000308	0.00938	3.51
10	50100000	50100000	65600	+	ENSG00000099290	WASHC2A	NA	protein_coding	NA	WASHC2A	-14.5	6.33	91.5	0.000308	0.00938	3.51
7	159000000	159000000	117000	-	ENSG00000106018	VIPR2	NA	protein_coding	NA	VIPR2	-14.3	5.77	91.3	0.000309	0.00938	3.51
15	70700000	70800000	109000	-	ENSG00000137831	UACA	NA	protein_coding	NA	UACA	-14.2	5.48	91.3	0.000309	0.00938	3.51
3	9900000	9920000	13800	+	ENSG00000163701	IL17RE	NA	protein_coding	NA	IL17RE	-13.9	5.02	91.2	0.000309	0.00938	3.51
3	44600000	44600000	63600	+	ENSG00000186448	ZNF197	NA	protein_coding	NA	ZNF197	-13.3	5.2	91.3	0.000309	0.00938	3.51
19	40700000	40700000	26700	-	ENSG00000123815	COQ8B	NA	protein_coding	NA	COQ8B	-8.46	5.42	60.8	0.00031	0.00938	3.51
7	20600000	20600000	1140	+	ENSG00000179460	EEF1A1P27	NA	processed_pseudogene	NA	EEF1A1P27	17.3	7.91	177	0.00031	0.00938	3.51
12	2880000	2940000	63900	+	ENSG00000078246	TULP3	NA	protein_coding	NA	TULP3	-14.8	5.8	91	0.000311	0.00938	3.51
6	37400000	37400000	40800	+	ENSG00000112130	RNF8	NA	protein_coding	NA	RNF8	-14.6	5.31	91.1	0.000311	0.00938	3.51
7	157000000	157000000	23500	+	ENSG00000146909	NOM1	NA	protein_coding	NA	NOM1	-13.6	5.2	91.1	0.000311	0.00938	3.51
X	49600000	49600000	16900	+	ENSG00000236362	GAGE12F	NA	protein_coding	NA	GAGE12F	-16.4	7.75	90.9	0.000312	0.00938	3.51
9	107000000	107000000	49100	+	ENSG00000119318	RAD23B	NA	protein_coding	NA	RAD23B	6.93	8.32	60.5	0.000314	0.00938	3.5
6	54800000	54900000	98300	+	ENSG00000168143	FAM83B	NA	protein_coding	NA	FAM83B	-13.4	5.33	90.6	0.000314	0.00938	3.5
3	185000000	185000000	1280	-	ENSG00000229638	RPL4P4	NA	processed_pseudogene	NA	RPL4P4	7.76	8.39	90.4	0.000315	0.00938	3.5
10	104000000	104000000	54600	-	ENSG00000065618	COL17A1	NA	protein_coding	NA	COL17A1	-15	6.09	90.4	0.000316	0.00938	3.5
22	19200000	19300000	112000	-	ENSG00000070371	CLTCL1	NA	protein_coding	NA	CLTCL1	-13.5	5.24	90.4	0.000316	0.00938	3.5
12	53500000	53500000	29100	+	ENSG00000197111	PCBP2	NA	protein_coding	NA	PCBP2	8.47	12.6	60.4	0.000316	0.00938	3.5
19	18900000	18900000	28200	-	ENSG00000223802	CERS1	NA	protein_coding	NA	CERS1	-14.3	5.32	90.3	0.000316	0.00938	3.5
7	30700000	30700000	48200	-	ENSG00000106113	CRHR2	NA	protein_coding	NA	CRHR2	-13.9	5.35	90.2	0.000317	0.00938	3.5
9	137000000	138000000	90500	-	ENSG00000130653	PNPLA7	NA	protein_coding	NA	PNPLA7	-15	6.06	90.2	0.000317	0.00938	3.5
1	154000000	154000000	51300	+	ENSG00000143569	UBAP2L	NA	protein_coding	NA	UBAP2L	6.7	12.4	60.3	0.000317	0.00938	3.5
15	84600000	84600000	26800	+	ENSG00000176371	ZSCAN2	NA	protein_coding	NA	ZSCAN2	-13.7	5.06	90.3	0.000317	0.00938	3.5
19	7960000	8010000	47100	-	ENSG00000066044	ELAVL1	NA	protein_coding	NA	ELAVL1	4.86	8.79	60.2	0.000318	0.00938	3.5
8	67200000	67300000	170000	-	ENSG00000066777	ARFGEF1	NA	protein_coding	NA	ARFGEF1	6.88	10.3	60.2	0.000319	0.00938	3.5
4	119000000	119000000	211000	+	ENSG00000172403	SYNPO2	NA	protein_coding	NA	SYNPO2	-12	6.5	60.1	0.000319	0.00938	3.5
3	38700000	38800000	119000	-	ENSG00000185313	SCN10A	NA	protein_coding	NA	SCN10A	-13.5	5.09	90	0.000319	0.00938	3.5
22	50100000	50200000	71800	+	ENSG00000073146	MOV10L1	NA	protein_coding	NA	MOV10L1	-14.3	5.14	89.6	0.000322	0.00938	3.49
1	157000000	157000000	8640	-	ENSG00000132688	NES	NA	protein_coding	NA	NES	-14.5	5.33	89.7	0.000322	0.00938	3.49
X	76400000	76400000	3630	+	ENSG00000198934	MAGEE1	NA	protein_coding	NA	MAGEE1	-14.5	5.4	89.7	0.000322	0.00938	3.49
20	50900000	50900000	42500	-	ENSG00000101126	ADNP	NA	protein_coding	NA	ADNP	7.07	9.07	59.9	0.000323	0.00938	3.49
12	125000000	125000000	42300	-	ENSG00000150990	DHX37	NA	protein_coding	NA	DHX37	-15.3	5.22	89.5	0.000323	0.00938	3.49
12	8820000	8890000	64400	+	ENSG00000166535	A2ML1	NA	protein_coding	NA	A2ML1	-14.4	5.1	89.5	0.000323	0.00938	3.49
19	40900000	40900000	7310	-	ENSG00000198077	CYP2A7	NA	protein_coding	NA	CYP2A7	-14.3	5.47	89.5	0.000323	0.00938	3.49
1	94300000	94300000	985	+	ENSG00000178596	GAPDHP29	NA	processed_pseudogene	NA	GAPDHP29	16.8	7.43	173	0.000324	0.00938	3.49
18	3070000	3220000	153000	-	ENSG00000101605	MYOM1	NA	protein_coding	NA	MYOM1	-14.2	5.57	89.3	0.000325	0.00938	3.49
6	40400000	40600000	196000	-	ENSG00000156564	LRFN2	NA	protein_coding	NA	LRFN2	-14.8	5.37	89.3	0.000325	0.00938	3.49
19	33100000	33200000	43700	+	ENSG00000166359	WDR88	NA	protein_coding	NA	WDR88	-14.1	4.93	89.2	0.000326	0.00938	3.49
2	215000000	215000000	75600	-	ENSG00000115414	FN1	NA	protein_coding	NA	FN1	-13.6	5.52	88.8	0.000328	0.00938	3.48
6	36400000	36400000	33700	-	ENSG00000010030	ETV7	NA	protein_coding	NA	ETV7	-13.3	5.44	88.8	0.000329	0.00938	3.48
15	57600000	57700000	123000	+	ENSG00000137878	GCOM1	NA	protein_coding	NA	GCOM1	-14.4	5.45	88.8	0.000329	0.00938	3.48
1	21500000	21600000	69000	+	ENSG00000162551	ALPL	NA	protein_coding	NA	ALPL	-13.7	5.07	88.8	0.000329	0.00938	3.48
16	32700000	32700000	3200	-	ENSG00000183632	TP53TG3	NA	protein_coding	NA	TP53TG3	-14.9	6.1	88.7	0.000329	0.00938	3.48
13	95800000	96100000	252000	-	ENSG00000102595	UGGT2	NA	protein_coding	NA	UGGT2	-15.7	6.93	88.6	0.00033	0.00938	3.48
10	48000000	48000000	21800	-	ENSG00000265018	AGAP12P	NA	transcribed_unprocessed_pseudogene	NA	AGAP12P	-15.1	6.88	88.7	0.00033	0.00938	3.48
10	30000000	30100000	103000	-	ENSG00000165757	JCAD	NA	protein_coding	NA	JCAD	-13.1	5.16	88.5	0.000331	0.00938	3.48
3	17200000	18400000	1290000	-	ENSG00000131374	TBC1D5	NA	protein_coding	NA	TBC1D5	5.11	7.32	59.3	0.000332	0.00938	3.48
3	14700000	14800000	97900	+	ENSG00000131379	C3orf20	NA	protein_coding	NA	C3orf20	-13.8	5.05	88.4	0.000332	0.00938	3.48
11	8690000	8910000	218000	-	ENSG00000166444	ST5	NA	protein_coding	NA	ST5	-14.1	5.53	88.3	0.000332	0.00938	3.48
11	67300000	67300000	20100	+	ENSG00000173020	GRK2	NA	protein_coding	NA	GRK2	5.69	8.92	59.2	0.000332	0.00938	3.48
1	13200000	13200000	5220	-	ENSG00000279169	PRAMEF13	NA	protein_coding	NA	PRAMEF13	-14.2	5.58	88.4	0.000332	0.00938	3.48
12	56700000	56700000	19200	-	ENSG00000196531	NACA	NA	protein_coding	NA	NACA	-14.2	5.3	88	0.000335	0.00938	3.47
22	24600000	24600000	34200	+	ENSG00000100031	GGT1	NA	protein_coding	NA	GGT1	-14.6	5.67	87.8	0.000337	0.00938	3.47
15	49100000	49200000	49600	-	ENSG00000166200	COPS2	NA	protein_coding	NA	COPS2	7.7	9.74	58.9	0.000337	0.00938	3.47
1	215000000	215000000	61400	+	ENSG00000117724	CENPF	NA	protein_coding	NA	CENPF	-15.2	6.15	87.5	0.000339	0.00938	3.47
1	36500000	36500000	17200	-	ENSG00000119535	CSF3R	NA	protein_coding	NA	CSF3R	-14.2	4.95	87.6	0.000339	0.00938	3.47
4	88200000	88200000	3270	-	ENSG00000251285	AC097484.2	NA	processed_pseudogene	NA	AC097484.2	17	7.57	169	0.000339	0.00938	3.47
12	27000000	27100000	43800	+	ENSG00000152944	MED21	NA	protein_coding	NA	MED21	6.48	7.39	58.7	0.00034	0.00938	3.47
6	130000000	130000000	77300	+	ENSG00000164484	TMEM200A	NA	protein_coding	NA	TMEM200A	-14	4.85	87.4	0.00034	0.00938	3.47
2	29200000	29900000	729000	-	ENSG00000171094	ALK	NA	protein_coding	NA	ALK	-14.1	5.3	87.5	0.00034	0.00938	3.47
3	67400000	67700000	294000	-	ENSG00000172340	SUCLG2	NA	protein_coding	NA	SUCLG2	4.95	9.04	58.7	0.00034	0.00938	3.47
22	21500000	21600000	74600	+	ENSG00000185651	UBE2L3	NA	protein_coding	NA	UBE2L3	6.24	10.6	58.8	0.00034	0.00938	3.47
X	10000000	10100000	129000	+	ENSG00000047644	WWC3	NA	protein_coding	NA	WWC3	-13.5	4.96	87.4	0.000341	0.00938	3.47
X	65600000	65700000	154000	+	ENSG00000147065	MSN	NA	protein_coding	NA	MSN	6.18	11.3	58.7	0.000341	0.00938	3.47
15	73600000	73600000	74100	-	ENSG00000156642	NPTN	NA	protein_coding	NA	NPTN	6.67	9.44	58.7	0.000341	0.00938	3.47
5	151000000	151000000	58100	+	ENSG00000171992	SYNPO	NA	protein_coding	NA	SYNPO	-6.19	6.24	58.7	0.000341	0.00938	3.47
16	67200000	67200000	4920	+	ENSG00000102890	ELMO3	NA	protein_coding	NA	ELMO3	-14.7	5.26	87.2	0.000342	0.00938	3.47
17	76700000	76700000	38500	-	ENSG00000182534	MXRA7	NA	protein_coding	NA	MXRA7	-10.6	4.54	58.6	0.000342	0.00938	3.47
6	167000000	167000000	27500	-	ENSG00000203690	TCP10	NA	protein_coding	NA	TCP10	-14.4	5.2	87.2	0.000342	0.00938	3.47
X	49200000	49200000	28300	-	ENSG00000102001	CACNA1F	NA	protein_coding	NA	CACNA1F	-12.6	4.91	58.5	0.000343	0.00938	3.46
6	170000000	170000000	21700	-	ENSG00000130024	PHF10	NA	protein_coding	NA	PHF10	5.29	7.7	58.5	0.000343	0.00938	3.46
1	180000000	180000000	99700	+	ENSG00000162782	TDRD5	NA	protein_coding	NA	TDRD5	-13.6	5.59	87.1	0.000343	0.00938	3.47
20	3780000	3790000	2890	-	ENSG00000125817	CENPB	NA	protein_coding	NA	CENPB	4.67	9.44	58.5	0.000344	0.00938	3.46
1	93100000	93100000	59800	+	ENSG00000143033	MTF2	NA	protein_coding	NA	MTF2	5.61	7.79	58.5	0.000344	0.00938	3.46
10	126000000	126000000	376000	-	ENSG00000148848	ADAM12	NA	protein_coding	NA	ADAM12	-12.9	4.93	58.4	0.000344	0.00938	3.46
1	242000000	242000000	150000	+	ENSG00000162843	WDR64	NA	protein_coding	NA	WDR64	-12.4	5.42	87	0.000344	0.00938	3.46
19	4440000	4460000	12800	-	ENSG00000167671	UBXN6	NA	protein_coding	NA	UBXN6	-14.3	5.46	86.8	0.000346	0.00938	3.46
5	177000000	177000000	53500	+	ENSG00000074276	CDHR2	NA	protein_coding	NA	CDHR2	-14.4	4.91	86.7	0.000347	0.00938	3.46
3	109000000	109000000	160000	-	ENSG00000114487	MORC1	NA	protein_coding	NA	MORC1	-13.2	5	86.7	0.000347	0.00938	3.46
20	58800000	58900000	71500	+	ENSG00000087460	GNAS	NA	protein_coding	NA	GNAS	6.87	10.4	58.2	0.000348	0.00938	3.46
12	125000000	125000000	5760	-	ENSG00000150991	UBC	NA	protein_coding	NA	UBC	5.06	9.22	58.2	0.000348	0.00938	3.46
5	796000	851000	55400	-	ENSG00000188818	ZDHHC11	NA	protein_coding	NA	ZDHHC11	-14.3	5.06	86.4	0.000349	0.00938	3.46
19	12400000	12400000	11300	-	ENSG00000196466	ZNF799	NA	protein_coding	NA	ZNF799	-13.3	5.91	86.4	0.000349	0.00938	3.46
1	199000000	199000000	119000	+	ENSG00000081237	PTPRC	NA	protein_coding	NA	PTPRC	-14.4	5.18	86.4	0.00035	0.00938	3.46
5	149000000	150000000	58500	-	ENSG00000113712	CSNK1A1	NA	protein_coding	NA	CSNK1A1	6.18	10.9	58.1	0.00035	0.00938	3.46
1	243000000	243000000	131000	-	ENSG00000143702	CEP170	NA	protein_coding	NA	CEP170	5.11	9.07	58.1	0.00035	0.00938	3.46
6	80100000	80300000	240000	+	ENSG00000083123	BCKDHB	NA	protein_coding	NA	BCKDHB	-13.9	4.8	86.2	0.000351	0.00938	3.45
7	139000000	139000000	77900	+	ENSG00000157741	UBN2	NA	protein_coding	NA	UBN2	5.68	8.4	58	0.000352	0.00938	3.45
3	78600000	79800000	1170000	-	ENSG00000169855	ROBO1	NA	protein_coding	NA	ROBO1	-14.5	5.64	86.1	0.000352	0.00938	3.45
1	59300000	59800000	514000	+	ENSG00000172456	FGGY	NA	protein_coding	NA	FGGY	-11.4	4.68	58	0.000352	0.00938	3.45
9	127000000	127000000	3730	-	ENSG00000197958	RPL12	NA	protein_coding	NA	RPL12	5.44	9.03	58	0.000352	0.00938	3.45
9	135000000	135000000	45800	+	ENSG00000130558	OLFM1	NA	protein_coding	NA	OLFM1	8.74	11.6	57.9	0.000353	0.00938	3.45
19	7890000	7900000	13500	+	ENSG00000171017	LRRC8E	NA	protein_coding	NA	LRRC8E	-12.6	5.43	57.9	0.000353	0.00938	3.45
4	37200000	37400000	205000	+	ENSG00000174145	NWD2	NA	protein_coding	NA	NWD2	-14	5.35	86	0.000353	0.00938	3.45
8	109000000	110000000	175000	+	ENSG00000205038	PKHD1L1	NA	protein_coding	NA	PKHD1L1	-14.4	6.74	86	0.000353	0.00938	3.45
3	9810000	9860000	47100	+	ENSG00000214021	TTLL3	NA	protein_coding	NA	TTLL3	-15.2	6.49	86	0.000353	0.00938	3.45
20	5950000	6000000	48300	+	ENSG00000125885	MCM8	NA	protein_coding	NA	MCM8	-8.21	5.17	57.9	0.000354	0.00938	3.45
1	224000000	224000000	231	-	ENSG00000236773	AC092809.3	NA	processed_pseudogene	NA	AC092809.3	16.6	7.2	164	0.000355	0.00938	3.45
19	13900000	14000000	22200	-	ENSG00000132000	PODNL1	NA	protein_coding	NA	PODNL1	-14.8	5.64	85.7	0.000356	0.00938	3.45
13	38700000	38900000	200000	+	ENSG00000150893	FREM2	NA	protein_coding	NA	FREM2	-14.1	5.61	85.7	0.000356	0.00938	3.45
15	80400000	80600000	194000	+	ENSG00000172379	ARNT2	NA	protein_coding	NA	ARNT2	-13.4	5.18	85.6	0.000356	0.00938	3.45
20	35700000	35700000	41000	-	ENSG00000131051	RBM39	NA	protein_coding	NA	RBM39	6.45	8.95	57.7	0.000357	0.00938	3.45
1	3750000	3770000	25200	+	ENSG00000162592	CCDC27	NA	protein_coding	NA	CCDC27	-13.9	4.94	85.5	0.000357	0.00938	3.45
4	7760000	7940000	181000	-	ENSG00000196526	AFAP1	NA	protein_coding	NA	AFAP1	-13.5	5.5	85.6	0.000357	0.00938	3.45
1	52000000	52000000	1710	-	ENSG00000198841	KTI12	NA	protein_coding	NA	KTI12	-14.2	5.4	85.5	0.000357	0.00938	3.45
2	168000000	168000000	2400	-	ENSG00000214211	CTAGE14P	NA	processed_pseudogene	NA	CTAGE14P	-13.5	4.93	85.6	0.000357	0.00938	3.45
3	38000000	38100000	84800	+	ENSG00000008226	DLEC1	NA	protein_coding	NA	DLEC1	-15.7	6.75	85.4	0.000359	0.00938	3.45
17	5470000	5490000	15600	-	ENSG00000072849	DERL2	NA	protein_coding	NA	DERL2	5.28	6.63	57.5	0.000359	0.00938	3.45
19	48100000	48200000	55200	-	ENSG00000105486	LIG1	NA	protein_coding	NA	LIG1	-14.4	5.06	85.3	0.000359	0.00938	3.44
11	118000000	118000000	39600	+	ENSG00000110344	UBE4A	NA	protein_coding	NA	UBE4A	5.55	8.89	57.5	0.000359	0.00938	3.44
13	110000000	111000000	207000	+	ENSG00000134871	COL4A2	NA	protein_coding	NA	COL4A2	-15.4	6.43	85.3	0.000359	0.00938	3.44
3	184000000	184000000	11900	+	ENSG00000145198	VWA5B2	NA	protein_coding	NA	VWA5B2	-15.5	5.69	85.3	0.000359	0.00938	3.44
7	149000000	149000000	21100	-	ENSG00000197362	ZNF786	NA	protein_coding	NA	ZNF786	-14.3	4.99	85.3	0.00036	0.00938	3.44
11	57700000	57800000	51100	+	ENSG00000254732	AP001931.1	NA	protein_coding	NA	AP001931.1	16.6	7.18	163	0.00036	0.00938	3.44
2	110000000	110000000	26400	+	ENSG00000256977	LIMS3	NA	protein_coding	NA	LIMS3	-13.9	5.65	85.2	0.00036	0.00938	3.44
2	136000000	136000000	80200	-	ENSG00000115866	DARS	NA	protein_coding	NA	DARS	7.29	8.05	57.4	0.000361	0.00938	3.44
3	24100000	24500000	379000	-	ENSG00000151090	THRB	NA	protein_coding	NA	THRB	-11.3	4.76	57.4	0.000361	0.00938	3.44
21	43900000	44000000	122000	+	ENSG00000160216	AGPAT3	NA	protein_coding	NA	AGPAT3	-13.6	4.87	85.1	0.000361	0.00938	3.44
1	3490000	3610000	124000	-	ENSG00000162591	MEGF6	NA	protein_coding	NA	MEGF6	-16.5	6.84	85.1	0.000361	0.00938	3.44
15	45400000	45400000	19100	+	ENSG00000171763	SPATA5L1	NA	protein_coding	NA	SPATA5L1	-14.6	5.97	85.1	0.000361	0.00938	3.44
1	16800000	16800000	15300	-	ENSG00000186715	MST1L	NA	transcribed_unprocessed_pseudogene	NA	MST1L	-13.8	4.98	85.1	0.000362	0.00938	3.44
2	28800000	28800000	51300	+	ENSG00000213639	PPP1CB	NA	protein_coding	NA	PPP1CB	7.72	9.77	57.4	0.000362	0.00938	3.44
21	45300000	45300000	24000	-	ENSG00000186866	POFUT2	NA	protein_coding	NA	POFUT2	-14.8	5.49	85	0.000363	0.00938	3.44
1	152000000	152000000	12100	-	ENSG00000197915	HRNR	NA	protein_coding	NA	HRNR	-16.4	7.63	84.9	0.000363	0.00938	3.44
7	73300000	73300000	15500	-	ENSG00000146755	TRIM50	NA	protein_coding	NA	TRIM50	-13.8	4.92	84.8	0.000364	0.00938	3.44
7	106000000	106000000	38000	-	ENSG00000105835	NAMPT	NA	protein_coding	NA	NAMPT	6.1	8.04	57.1	0.000365	0.00938	3.44
15	99700000	99700000	17900	-	ENSG00000183060	LYSMD4	NA	protein_coding	NA	LYSMD4	-14.1	4.92	84.7	0.000365	0.00938	3.44
9	84000000	84000000	12500	-	ENSG00000165119	HNRNPK	NA	protein_coding	NA	HNRNPK	8.07	11.4	57.1	0.000366	0.00938	3.44
19	56000000	56100000	62100	+	ENSG00000171487	NLRP5	NA	protein_coding	NA	NLRP5	-13.7	4.86	84.6	0.000366	0.00938	3.44
16	46700000	46700000	33400	-	ENSG00000069329	VPS35	NA	protein_coding	NA	VPS35	7.11	8.87	57.1	0.000367	0.00938	3.44
4	5050000	5500000	450000	+	ENSG00000152953	STK32B	NA	protein_coding	NA	STK32B	-13.9	5.05	84.5	0.000367	0.00938	3.44
1	230000000	230000000	112000	-	ENSG00000177614	PGBD5	NA	protein_coding	NA	PGBD5	-13.1	4.34	57	0.000367	0.00938	3.44
19	12600000	12600000	1540	+	ENSG00000213290	PGK1P2	NA	processed_pseudogene	NA	PGK1P2	16.6	7.24	161	0.000367	0.00938	3.44
1	54800000	54800000	21600	-	ENSG00000006555	TTC22	NA	protein_coding	NA	TTC22	-14	5.01	84.4	0.000368	0.00938	3.43
2	6920000	7070000	151000	+	ENSG00000151692	RNF144A	NA	protein_coding	NA	RNF144A	-14.4	5.47	84.4	0.000368	0.00938	3.43
8	12200000	12200000	12000	-	ENSG00000186523	FAM86B1	NA	protein_coding	NA	FAM86B1	-15.2	6.34	84.4	0.000368	0.00938	3.43
21	43700000	43700000	36500	+	ENSG00000160208	RRP1B	NA	protein_coding	NA	RRP1B	-14	5.03	84.3	0.000369	0.00938	3.43
10	133000000	133000000	134000	-	ENSG00000171811	CFAP46	NA	protein_coding	NA	CFAP46	-15.7	6.3	84.3	0.000369	0.00938	3.43
17	62400000	62400000	746	+	ENSG00000239527	RPS23P7	NA	processed_pseudogene	NA	RPS23P7	16.8	7.38	161	0.000369	0.00938	3.43
2	55000000	55100000	140000	-	ENSG00000115310	RTN4	NA	protein_coding	NA	RTN4	6	8.7	56.9	0.00037	0.00938	3.43
19	4180000	4220000	41500	+	ENSG00000089847	ANKRD24	NA	protein_coding	NA	ANKRD24	-15	5.54	84	0.000371	0.00938	3.43
5	37300000	37400000	83000	-	ENSG00000113569	NUP155	NA	protein_coding	NA	NUP155	-11.5	4.43	56.8	0.000371	0.00938	3.43
6	139000000	139000000	108000	+	ENSG00000203734	ECT2L	NA	protein_coding	NA	ECT2L	-12.7	5.23	84.1	0.000371	0.00938	3.43
3	130000000	130000000	424	+	ENSG00000249253	AC093004.1	NA	processed_pseudogene	NA	AC093004.1	16.6	7.25	160	0.000371	0.00938	3.43
17	8100000	8120000	23100	-	ENSG00000179148	ALOXE3	NA	protein_coding	NA	ALOXE3	-13.8	4.9	84	0.000372	0.00938	3.43
15	55800000	56000000	167000	-	ENSG00000069869	NEDD4	NA	protein_coding	NA	NEDD4	-14.3	5.87	83.8	0.000373	0.00938	3.43
19	40200000	40300000	55200	-	ENSG00000105221	AKT2	NA	protein_coding	NA	AKT2	5.26	7.35	56.7	0.000373	0.00938	3.43
5	180000000	180000000	20600	-	ENSG00000169045	HNRNPH1	NA	protein_coding	NA	HNRNPH1	8.73	11.1	56.7	0.000374	0.00938	3.43
6	132000000	132000000	2580	-	ENSG00000236761	CTAGE9	NA	protein_coding	NA	CTAGE9	-15.8	7.27	83.8	0.000374	0.00938	3.43
3	42500000	42600000	53100	-	ENSG00000093183	SEC22C	NA	protein_coding	NA	SEC22C	-13.8	5.09	83.7	0.000375	0.00938	3.43
10	96400000	96500000	149000	-	ENSG00000095587	TLL2	NA	protein_coding	NA	TLL2	-13.7	5.15	83.7	0.000375	0.00938	3.43
19	9600000	9620000	16600	-	ENSG00000171469	ZNF561	NA	protein_coding	NA	ZNF561	-12.9	5.06	83.7	0.000375	0.00938	3.43
1	179000000	179000000	16000	+	ENSG00000186283	TOR3A	NA	protein_coding	NA	TOR3A	-13.5	4.8	83.7	0.000375	0.00938	3.43
19	10700000	10700000	12000	+	ENSG00000213339	QTRT1	NA	protein_coding	NA	QTRT1	-14	4.9	83.7	0.000375	0.00938	3.43
1	61700000	62200000	436000	+	ENSG00000132849	PATJ	NA	protein_coding	NA	PATJ	-14.1	5.14	83.6	0.000376	0.00938	3.43
X	153000000	153000000	59000	+	ENSG00000147394	ZNF185	NA	protein_coding	NA	ZNF185	-13.7	4.9	83.6	0.000376	0.00938	3.43
6	168000000	168000000	26900	-	ENSG00000164488	DACT2	NA	protein_coding	NA	DACT2	-15.3	6.07	83.6	0.000376	0.00938	3.43
11	123000000	124000000	269000	+	ENSG00000023171	GRAMD1B	NA	protein_coding	NA	GRAMD1B	5.02	7.05	56.4	0.000378	0.00938	3.42
7	107000000	107000000	33600	+	ENSG00000105856	HBP1	NA	protein_coding	NA	HBP1	5.16	7.89	56.4	0.000378	0.00938	3.42
1	47300000	47300000	64000	-	ENSG00000123473	STIL	NA	protein_coding	NA	STIL	-13.1	5.63	83.4	0.000378	0.00938	3.42
19	1780000	1810000	30200	-	ENSG00000130270	ATP8B3	NA	protein_coding	NA	ATP8B3	-15.2	6.15	83.4	0.000378	0.00938	3.42
1	31800000	31800000	25600	-	ENSG00000134668	SPOCD1	NA	protein_coding	NA	SPOCD1	-12.8	5.45	56.4	0.000378	0.00938	3.42
17	45100000	45100000	57400	+	ENSG00000136448	NMT1	NA	protein_coding	NA	NMT1	4.72	8.58	56.4	0.000378	0.00938	3.42
7	36200000	36300000	148000	+	ENSG00000122547	EEPD1	NA	protein_coding	NA	EEPD1	-13.3	5.01	83.3	0.000379	0.00938	3.42
19	50700000	50700000	2360	+	ENSG00000105472	CLEC11A	NA	protein_coding	NA	CLEC11A	-13.8	4.8	83.2	0.00038	0.00938	3.42
1	24400000	24400000	59900	-	ENSG00000001460	STPG1	NA	protein_coding	NA	STPG1	-12.9	4.07	56.2	0.000381	0.00938	3.42
1	202000000	202000000	126000	+	ENSG00000133067	LGR6	NA	protein_coding	NA	LGR6	-14	4.78	83.1	0.000381	0.00938	3.42
19	48200000	48200000	26900	+	ENSG00000185453	ZSWIM9	NA	protein_coding	NA	ZSWIM9	-13.8	4.81	83.1	0.000381	0.00938	3.42
1	231000000	231000000	5100	-	ENSG00000116903	EXOC8	NA	protein_coding	NA	EXOC8	-13.8	4.82	83	0.000382	0.00938	3.42
7	101000000	101000000	25000	-	ENSG00000196411	EPHB4	NA	protein_coding	NA	EPHB4	-12.7	5.71	56.2	0.000382	0.00938	3.42
1	1290000	1310000	17200	-	ENSG00000131584	ACAP3	NA	protein_coding	NA	ACAP3	-15.4	5.82	82.9	0.000383	0.00938	3.42
5	73500000	73500000	7230	+	ENSG00000145741	BTF3	NA	protein_coding	NA	BTF3	7.21	9.92	56.1	0.000383	0.00938	3.42
16	81100000	81200000	119000	-	ENSG00000166473	PKD1L2	NA	polymorphic_pseudogene	NA	PKD1L2	-14.1	5.36	82.9	0.000383	0.00938	3.42
17	32400000	32500000	38900	+	ENSG00000108671	PSMD11	NA	protein_coding	NA	PSMD11	6.25	9.3	56.1	0.000384	0.00938	3.42
4	103000000	103000000	93100	-	ENSG00000138778	CENPE	NA	protein_coding	NA	CENPE	-13.5	5.42	82.8	0.000384	0.00938	3.42
1	47100000	47100000	12300	+	ENSG00000162365	CYP4A22	NA	protein_coding	NA	CYP4A22	-14.3	4.98	82.8	0.000384	0.00938	3.42
17	58600000	58700000	135000	-	ENSG00000121101	TEX14	NA	protein_coding	NA	TEX14	-13.4	5.08	82.7	0.000385	0.00938	3.41
1	233000000	233000000	57400	+	ENSG00000143674	MAP3K21	NA	protein_coding	NA	MAP3K21	-13.8	4.93	82.7	0.000385	0.00938	3.41
17	80100000	80100000	18300	+	ENSG00000171298	GAA	NA	protein_coding	NA	GAA	-14.3	5.59	82.7	0.000385	0.00938	3.41
19	11400000	11400000	35000	-	ENSG00000205517	RGL3	NA	protein_coding	NA	RGL3	-13.7	4.78	82.7	0.000385	0.00938	3.41
7	4780000	4790000	18800	+	ENSG00000242802	AP5Z1	NA	protein_coding	NA	AP5Z1	-14.8	5.95	82.7	0.000385	0.00938	3.41
10	27000000	27100000	109000	-	ENSG00000107890	ANKRD26	NA	protein_coding	NA	ANKRD26	-13.2	5.54	82.6	0.000386	0.00938	3.41
6	43100000	43100000	5410	-	ENSG00000112651	MRPL2	NA	protein_coding	NA	MRPL2	-11.8	4.49	55.9	0.000386	0.00938	3.41
2	112000000	112000000	131000	+	ENSG00000153208	MERTK	NA	protein_coding	NA	MERTK	-13.3	4.89	82.5	0.000387	0.00938	3.41
4	1790000	1810000	15600	+	ENSG00000068078	FGFR3	NA	protein_coding	NA	FGFR3	-10.9	6.06	55.8	0.000388	0.00938	3.41
2	27400000	27400000	28400	-	ENSG00000115241	PPM1G	NA	protein_coding	NA	PPM1G	5.07	9.19	55.8	0.000388	0.00938	3.41
13	24900000	24900000	40600	-	ENSG00000151849	CENPJ	NA	protein_coding	NA	CENPJ	-13	5.05	82.3	0.000389	0.00938	3.41
19	53100000	53100000	25200	-	ENSG00000170954	ZNF415	NA	protein_coding	NA	ZNF415	-13.3	5.09	82.3	0.000389	0.00938	3.41
21	44500000	44700000	214000	-	ENSG00000175894	TSPEAR	NA	protein_coding	NA	TSPEAR	-14	5	82.3	0.000389	0.00938	3.41
17	10500000	10500000	26200	-	ENSG00000109061	MYH1	NA	protein_coding	NA	MYH1	-11.3	5.8	55.7	0.00039	0.00938	3.41
17	65500000	65600000	33100	-	ENSG00000168646	AXIN2	NA	protein_coding	NA	AXIN2	-13.7	5.01	82.2	0.00039	0.00938	3.41
16	89200000	89200000	19400	+	ENSG00000170100	ZNF778	NA	protein_coding	NA	ZNF778	-14.7	5.74	82.3	0.00039	0.00938	3.41
15	30400000	30400000	10400	-	ENSG00000186399	GOLGA8R	NA	protein_coding	NA	GOLGA8R	-15.4	6.34	82.3	0.00039	0.00938	3.41
X	57900000	57900000	4110	-	ENSG00000198205	ZXDA	NA	protein_coding	NA	ZXDA	-12.4	5.9	55.7	0.00039	0.00938	3.41
20	57500000	57500000	29700	-	ENSG00000124092	CTCFL	NA	protein_coding	NA	CTCFL	-13.5	5.03	82.1	0.000391	0.00938	3.41
6	123000000	124000000	421000	-	ENSG00000186439	TRDN	NA	protein_coding	NA	TRDN	-14	5.93	82.1	0.000392	0.00938	3.41
21	46200000	46300000	51200	-	ENSG00000160294	MCM3AP	NA	protein_coding	NA	MCM3AP	-13.7	5.03	81.9	0.000393	0.00938	3.41
7	817000	896000	79800	+	ENSG00000164828	SUN1	NA	protein_coding	NA	SUN1	-15	5.41	81.9	0.000393	0.00938	3.41
4	144000000	144000000	123000	-	ENSG00000183090	FREM3	NA	protein_coding	NA	FREM3	-13.8	5.23	81.9	0.000393	0.00938	3.41
16	30800000	30900000	61300	-	ENSG00000099385	BCL7C	NA	protein_coding	NA	BCL7C	5.61	7.7	55.5	0.000394	0.00938	3.4
3	160000000	160000000	53300	-	ENSG00000213186	TRIM59	NA	protein_coding	NA	TRIM59	-14.4	4.57	81.8	0.000394	0.00938	3.4
19	58500000	58500000	25400	-	ENSG00000119574	ZBTB45	NA	protein_coding	NA	ZBTB45	-14.1	5.01	81.7	0.000395	0.00938	3.4
19	17500000	17600000	30500	+	ENSG00000167483	NIBAN3	NA	protein_coding	NA	NIBAN3	-12.2	5.52	55.4	0.000395	0.00938	3.4
11	74000000	74200000	158000	-	ENSG00000168014	C2CD3	NA	protein_coding	NA	C2CD3	-13.9	5.22	81.7	0.000395	0.00938	3.4
1	55000000	55100000	25300	+	ENSG00000169174	PCSK9	NA	protein_coding	NA	PCSK9	-14.1	5.47	81.7	0.000395	0.00938	3.4
2	189000000	189000000	38400	+	ENSG00000168542	COL3A1	NA	protein_coding	NA	COL3A1	-13.5	5.35	81.6	0.000397	0.00938	3.4
3	25700000	25800000	71100	-	ENSG00000151092	NGLY1	NA	protein_coding	NA	NGLY1	-13.5	5.31	81.5	0.000398	0.00938	3.4
3	32800000	32900000	79800	+	ENSG00000206557	TRIM71	NA	protein_coding	NA	TRIM71	-13.7	4.86	81.5	0.000398	0.00938	3.4
3	52300000	52400000	84200	+	ENSG00000114841	DNAH1	NA	protein_coding	NA	DNAH1	-16.2	6.76	81.4	0.000399	0.00938	3.4
12	115000000	115000000	13900	-	ENSG00000135111	TBX3	NA	protein_coding	NA	TBX3	-14.1	5.2	81.4	0.000399	0.00938	3.4
19	44200000	44200000	13300	+	ENSG00000167380	ZNF226	NA	protein_coding	NA	ZNF226	-11.2	5.15	55.2	0.000399	0.00938	3.4
15	74700000	74700000	6000	-	ENSG00000140465	CYP1A1	NA	protein_coding	NA	CYP1A1	-13.6	4.91	81.3	0.0004	0.00938	3.4
6	26000000	26000000	381	-	ENSG00000276410	HIST1H2BB	NA	protein_coding	NA	HIST1H2BB	13	6.68	81.3	0.0004	0.00938	3.4
5	78000000	78300000	294000	-	ENSG00000132842	AP3B1	NA	protein_coding	NA	AP3B1	6.46	8.34	55.1	0.000401	0.00938	3.4
3	1090000	1400000	312000	+	ENSG00000134115	CNTN6	NA	protein_coding	NA	CNTN6	-13.6	4.96	81.2	0.000401	0.00938	3.4
19	5780000	5790000	6390	-	ENSG00000141994	DUS3L	NA	protein_coding	NA	DUS3L	-13.9	4.93	81.2	0.000401	0.00938	3.4
4	7190000	7740000	550000	+	ENSG00000184985	SORCS2	NA	protein_coding	NA	SORCS2	-14.9	4.87	81.2	0.000401	0.00938	3.4
19	35600000	35600000	12600	+	ENSG00000249115	HAUS5	NA	protein_coding	NA	HAUS5	-12.3	4.37	55.1	0.000401	0.00938	3.4
6	31000000	31000000	24900	+	ENSG00000261272	MUC22	NA	protein_coding	NA	MUC22	-14.2	5.44	81.2	0.000401	0.00938	3.4
1	229000000	230000000	68100	-	ENSG00000069248	NUP133	NA	protein_coding	NA	NUP133	-14	5.05	81.1	0.000402	0.00938	3.4
2	227000000	227000000	150000	+	ENSG00000169031	COL4A3	NA	protein_coding	NA	COL4A3	-13.5	5.13	81.2	0.000402	0.00938	3.4
1	114000000	114000000	50600	-	ENSG00000081019	RSBN1	NA	protein_coding	NA	RSBN1	5	9.17	55	0.000403	0.00938	3.39
1	20700000	20700000	13100	-	ENSG00000189410	SH2D5	NA	protein_coding	NA	SH2D5	-14.8	4.92	81	0.000403	0.00938	3.39
2	135000000	136000000	394000	-	ENSG00000121988	ZRANB3	NA	protein_coding	NA	ZRANB3	-13.2	5.4	80.9	0.000404	0.00938	3.39
1	43300000	43300000	22100	+	ENSG00000066056	TIE1	NA	protein_coding	NA	TIE1	-14.7	5.35	80.8	0.000405	0.00938	3.39
19	38900000	38900000	15600	-	ENSG00000104835	SARS2	NA	protein_coding	NA	SARS2	-13.8	4.8	80.8	0.000405	0.00938	3.39
12	49100000	49100000	3620	-	ENSG00000123416	TUBA1B	NA	protein_coding	NA	TUBA1B	9.8	12.7	54.9	0.000405	0.00938	3.39
1	120000000	120000000	2980	-	ENSG00000134249	ADAM30	NA	protein_coding	NA	ADAM30	-13.7	4.86	80.8	0.000405	0.00938	3.39
12	32400000	32600000	247000	+	ENSG00000139132	FGD4	NA	protein_coding	NA	FGD4	-12.6	5.21	80.8	0.000405	0.00938	3.39
4	9350000	9350000	1590	+	ENSG00000231051	USP17L28	NA	protein_coding	NA	USP17L28	-16.9	8.27	80.8	0.000405	0.00938	3.39
X	55200000	55200000	1050	-	ENSG00000256045	MTRNR2L10	NA	protein_coding	NA	MTRNR2L10	16.4	6.99	153	0.000405	0.00938	3.39
1	175000000	175000000	80200	+	ENSG00000120332	TNN	NA	protein_coding	NA	TNN	-14	5.05	80.7	0.000407	0.00938	3.39
14	49600000	49600000	10100	-	ENSG00000165506	DNAAF2	NA	protein_coding	NA	DNAAF2	-13.9	4.64	80.7	0.000407	0.00938	3.39
11	448000	491000	43100	+	ENSG00000174915	PTDSS2	NA	protein_coding	NA	PTDSS2	5.15	8.59	54.8	0.000407	0.00938	3.39
10	124000000	124000000	85900	-	ENSG00000182022	CHST15	NA	protein_coding	NA	CHST15	-13.1	5.06	80.7	0.000407	0.00938	3.39
8	141000000	141000000	344000	-	ENSG00000169398	PTK2	NA	protein_coding	NA	PTK2	5.67	9.33	54.8	0.000408	0.00938	3.39
8	143000000	143000000	55600	-	ENSG00000184428	TOP1MT	NA	protein_coding	NA	TOP1MT	-14	4.65	80.6	0.000408	0.00938	3.39
1	47000000	47100000	27100	+	ENSG00000186377	CYP4X1	NA	protein_coding	NA	CYP4X1	-14	4.82	80.5	0.000408	0.00938	3.39
1	200000000	200000000	150000	+	ENSG00000116833	NR5A2	NA	protein_coding	NA	NR5A2	-14	5.13	80.5	0.000409	0.00938	3.39
3	38000000	38000000	19100	+	ENSG00000136059	VILL	NA	protein_coding	NA	VILL	-14.7	5.74	80.4	0.00041	0.00938	3.39
9	123000000	123000000	159000	-	ENSG00000165209	STRBP	NA	protein_coding	NA	STRBP	4.76	9.03	54.7	0.00041	0.00938	3.39
15	99600000	99700000	151000	+	ENSG00000068305	MEF2A	NA	protein_coding	NA	MEF2A	4.84	8.38	54.6	0.000411	0.00938	3.39
1	94100000	94300000	126000	-	ENSG00000137962	ARHGAP29	NA	protein_coding	NA	ARHGAP29	-13.8	4.65	80.3	0.000411	0.00938	3.39
19	36900000	37000000	82400	+	ENSG00000198453	ZNF568	NA	protein_coding	NA	ZNF568	-13.3	5.29	80.3	0.000411	0.00938	3.39
7	151000000	151000000	36900	+	ENSG00000002726	AOC1	NA	protein_coding	NA	AOC1	-14.2	5.1	80.2	0.000412	0.00938	3.39
6	160000000	160000000	107000	-	ENSG00000112499	SLC22A2	NA	protein_coding	NA	SLC22A2	-13.5	4.84	80.2	0.000412	0.00938	3.39
1	224000000	224000000	66100	-	ENSG00000143514	TP53BP2	NA	protein_coding	NA	TP53BP2	-13.2	4.95	80.2	0.000412	0.00938	3.38
X	110000000	110000000	180000	+	ENSG00000157600	TMEM164	NA	protein_coding	NA	TMEM164	8.81	9.14	54.5	0.000412	0.00938	3.38
13	60400000	60600000	177000	+	ENSG00000083544	TDRD3	NA	protein_coding	NA	TDRD3	-13.7	5.15	80.2	0.000413	0.00938	3.38
7	103000000	104000000	518000	-	ENSG00000189056	RELN	NA	protein_coding	NA	RELN	-14.2	6.75	80	0.000414	0.00938	3.38
15	78200000	78200000	78200	-	ENSG00000103740	ACSBG1	NA	protein_coding	NA	ACSBG1	-14.2	5.07	80	0.000415	0.00938	3.38
8	89800000	89800000	33300	+	ENSG00000104312	RIPK2	NA	protein_coding	NA	RIPK2	-14.1	4.63	80	0.000415	0.00938	3.38
5	157000000	158000000	180000	-	ENSG00000135074	ADAM19	NA	protein_coding	NA	ADAM19	-13.7	4.96	80	0.000415	0.00938	3.38
16	4560000	4600000	44200	+	ENSG00000205832	C16orf96	NA	protein_coding	NA	C16orf96	-13.7	4.65	80	0.000415	0.00938	3.38
16	560000	566000	5140	+	ENSG00000161992	PRR35	NA	protein_coding	NA	PRR35	-14.4	5.1	79.8	0.000417	0.00938	3.38
6	39200000	39200000	40500	-	ENSG00000164626	KCNK5	NA	protein_coding	NA	KCNK5	-13.8	4.74	79.8	0.000417	0.00938	3.38
6	42900000	42900000	557	-	ENSG00000221821	C6orf226	NA	protein_coding	NA	C6orf226	-14	4.83	79.8	0.000417	0.00938	3.38
5	177000000	177000000	7440	-	ENSG00000131187	F12	NA	protein_coding	NA	F12	-14.2	4.8	79.6	0.000419	0.00938	3.38
1	186000000	186000000	457000	+	ENSG00000143341	HMCN1	NA	protein_coding	NA	HMCN1	-12.9	6.93	54.2	0.000419	0.00938	3.38
8	123000000	123000000	31100	+	ENSG00000147689	FAM83A	NA	protein_coding	NA	FAM83A	-14	5.29	79.6	0.000419	0.00938	3.38
3	56600000	56600000	64700	+	ENSG00000180376	CCDC66	NA	protein_coding	NA	CCDC66	-12.6	5.28	79.6	0.000419	0.00938	3.38
20	35000000	35100000	90400	-	ENSG00000100991	TRPC4AP	NA	protein_coding	NA	TRPC4AP	6	9.91	54.2	0.00042	0.00938	3.38
5	135000000	135000000	66000	-	ENSG00000113648	H2AFY	NA	protein_coding	NA	H2AFY	6.22	9.19	54.2	0.00042	0.00938	3.38
13	52400000	52400000	39200	-	ENSG00000136114	THSD1	NA	protein_coding	NA	THSD1	-13.1	5.17	79.5	0.00042	0.00938	3.38
8	120000000	120000000	314000	+	ENSG00000187955	COL14A1	NA	protein_coding	NA	COL14A1	-13.6	5.9	79.5	0.00042	0.00938	3.38
7	45800000	45800000	46200	+	ENSG00000272556	GTF2IP13	NA	transcribed_unprocessed_pseudogene	NA	GTF2IP13	-15.5	6.26	79.5	0.00042	0.00938	3.38
19	48600000	48600000	14000	-	ENSG00000105523	FAM83E	NA	protein_coding	NA	FAM83E	-14.6	5.13	79.5	0.000421	0.00938	3.38
11	74000000	74000000	8580	-	ENSG00000175567	UCP2	NA	protein_coding	NA	UCP2	7.34	10	79.5	0.000421	0.00938	3.38
1	104000000	104000000	25700	+	ENSG00000240038	AMY2B	NA	protein_coding	NA	AMY2B	-9.64	5.46	54.1	0.000421	0.00938	3.38
2	198000000	198000000	3030	+	ENSG00000247626	MARS2	NA	protein_coding	NA	MARS2	-13.8	4.9	79.4	0.000421	0.00938	3.38
8	47300000	47700000	475000	+	ENSG00000164808	SPIDR	NA	protein_coding	NA	SPIDR	-13.2	4.89	79.4	0.000422	0.00938	3.38
8	27600000	27700000	42900	+	ENSG00000168077	SCARA3	NA	protein_coding	NA	SCARA3	-13.5	5.04	79.4	0.000422	0.00938	3.37
2	108000000	108000000	63900	+	ENSG00000196862	RGPD4	NA	protein_coding	NA	RGPD4	-8.01	7.38	54.1	0.000422	0.00938	3.38
7	75000000	75100000	47100	-	ENSG00000274523	RCC1L	NA	protein_coding	NA	RCC1L	-14.7	5.68	79.3	0.000423	0.00938	3.37
7	127000000	127000000	85100	-	ENSG00000048405	ZNF800	NA	protein_coding	NA	ZNF800	5.8	8.97	54	0.000424	0.00938	3.37
5	126000000	126000000	136000	+	ENSG00000155324	GRAMD2B	NA	protein_coding	NA	GRAMD2B	-12.9	4.87	79.2	0.000424	0.00938	3.37
2	153000000	153000000	43400	+	ENSG00000177917	ARL6IP6	NA	protein_coding	NA	ARL6IP6	-13.7	5	79.2	0.000424	0.00938	3.37
12	14800000	14800000	3130	-	ENSG00000197837	HIST4H4	NA	protein_coding	NA	HIST4H4	8.71	6.29	53.9	0.000424	0.00938	3.37
5	177000000	177000000	11300	-	ENSG00000213347	MXD3	NA	protein_coding	NA	MXD3	-13.8	4.8	79.2	0.000424	0.00938	3.37
11	3670000	3670000	5800	-	ENSG00000129749	CHRNA10	NA	protein_coding	NA	CHRNA10	-14.5	5.77	79.1	0.000426	0.00938	3.37
6	49600000	49600000	31700	-	ENSG00000112077	RHAG	NA	protein_coding	NA	RHAG	-13.3	5.02	78.9	0.000427	0.00938	3.37
1	145000000	145000000	116000	-	ENSG00000162825	NBPF20	NA	protein_coding	NA	NBPF20	-13	4.9	78.9	0.000427	0.00938	3.37
6	36300000	36300000	21100	-	ENSG00000189325	BNIP5	NA	protein_coding	NA	BNIP5	-14	5	79	0.000427	0.00938	3.37
3	66400000	66500000	122000	-	ENSG00000144749	LRIG1	NA	protein_coding	NA	LRIG1	-13	5.23	78.9	0.000428	0.00938	3.37
3	9400000	9480000	81600	+	ENSG00000168137	SETD5	NA	protein_coding	NA	SETD5	4.83	10.7	53.8	0.000428	0.00938	3.37
11	45100000	45200000	139000	+	ENSG00000019485	PRDM11	NA	protein_coding	NA	PRDM11	-13.4	5.09	78.8	0.000429	0.00938	3.37
16	75200000	75300000	39900	-	ENSG00000050820	BCAR1	NA	protein_coding	NA	BCAR1	-14.6	5.72	78.8	0.000429	0.00938	3.37
12	6570000	6610000	44400	-	ENSG00000111642	CHD4	NA	protein_coding	NA	CHD4	6.82	11.5	53.7	0.000429	0.00938	3.37
11	68700000	68800000	44100	-	ENSG00000132749	TESMIN	NA	protein_coding	NA	TESMIN	-13.9	4.96	78.8	0.000429	0.00938	3.37
10	98200000	98300000	20500	-	ENSG00000138131	LOXL4	NA	protein_coding	NA	LOXL4	-14.3	5.33	78.8	0.000429	0.00938	3.37
19	33300000	33300000	2600	-	ENSG00000245848	CEBPA	NA	protein_coding	NA	CEBPA	5.58	7.64	53.7	0.000429	0.00938	3.37
13	41600000	42000000	394000	-	ENSG00000102763	VWA8	NA	protein_coding	NA	VWA8	-14	5.17	78.7	0.00043	0.00938	3.37
7	47700000	47900000	208000	-	ENSG00000158683	PKD1L1	NA	protein_coding	NA	PKD1L1	-14.1	5.87	78.5	0.000432	0.00938	3.36
19	57700000	57700000	7870	-	ENSG00000083814	ZNF671	NA	protein_coding	NA	ZNF671	-14.5	4.98	78.5	0.000433	0.00938	3.36
7	6100000	6160000	56700	+	ENSG00000106346	USP42	NA	protein_coding	NA	USP42	-14.6	6.08	78.4	0.000433	0.00938	3.36
7	77500000	77600000	103000	+	ENSG00000127947	PTPN12	NA	protein_coding	NA	PTPN12	5.45	6.92	53.5	0.000433	0.00938	3.36
6	121000000	121000000	255000	-	ENSG00000146350	TBC1D32	NA	protein_coding	NA	TBC1D32	-12.3	5.29	78.5	0.000433	0.00938	3.36
17	74900000	74900000	9640	+	ENSG00000183034	OTOP2	NA	protein_coding	NA	OTOP2	-13.3	4.88	78.5	0.000433	0.00938	3.36
19	53200000	53200000	34200	-	ENSG00000197497	ZNF665	NA	protein_coding	NA	ZNF665	-12.4	4.99	78.4	0.000433	0.00938	3.36
12	10200000	10200000	10700	+	ENSG00000139112	GABARAPL1	NA	protein_coding	NA	GABARAPL1	7.41	7.79	78.4	0.000434	0.00938	3.36
15	45100000	45100000	21700	-	ENSG00000140279	DUOX2	NA	protein_coding	NA	DUOX2	-13	6.06	53.5	0.000434	0.00938	3.36
12	56600000	56600000	7810	-	ENSG00000110955	ATP5F1B	NA	protein_coding	NA	ATP5F1B	5.53	7.68	53.5	0.000435	0.00938	3.36
6	43200000	43200000	10200	+	ENSG00000112658	SRF	NA	protein_coding	NA	SRF	5.39	9.77	53.4	0.000435	0.00938	3.36
20	10400000	10600000	202000	+	ENSG00000149346	SLX4IP	NA	protein_coding	NA	SLX4IP	-12.3	5.14	78.2	0.000435	0.00938	3.36
9	91600000	92000000	387000	-	ENSG00000169071	ROR2	NA	protein_coding	NA	ROR2	-13.6	4.81	78.3	0.000435	0.00938	3.36
20	32900000	33000000	103000	+	ENSG00000215529	EFCAB8	NA	protein_coding	NA	EFCAB8	-13.9	5.08	78.3	0.000435	0.00938	3.36
6	133000000	133000000	19600	-	ENSG00000112303	VNN2	NA	protein_coding	NA	VNN2	-13.2	5.01	78.2	0.000436	0.00938	3.36
5	141000000	141000000	205000	+	ENSG00000204967	PCDHA4	NA	protein_coding	NA	PCDHA4	-9.17	5.51	53.4	0.000436	0.00938	3.36
1	108000000	108000000	394000	-	ENSG00000134215	VAV3	NA	protein_coding	NA	VAV3	5.75	8.69	53.4	0.000437	0.00938	3.36
7	99700000	99700000	50200	-	ENSG00000160870	CYP3A7	NA	protein_coding	NA	CYP3A7	-13.5	5.03	78.2	0.000437	0.00938	3.36
19	7400000	7470000	77400	+	ENSG00000104880	ARHGEF18	NA	protein_coding	NA	ARHGEF18	-14.9	5.93	78	0.000438	0.00938	3.36
15	63000000	63100000	29300	+	ENSG00000140416	TPM1	NA	protein_coding	NA	TPM1	5.27	10.2	53.3	0.000438	0.00938	3.36
4	9220000	9220000	1950	+	ENSG00000233136	USP17L11	NA	protein_coding	NA	USP17L11	-18	8.9	78	0.000438	0.00938	3.36
7	74800000	74900000	55400	-	ENSG00000196275	GTF2IRD2	NA	protein_coding	NA	GTF2IRD2	-10.7	4.44	53.2	0.00044	0.00938	3.36
13	49200000	49300000	45600	+	ENSG00000102543	CDADC1	NA	protein_coding	NA	CDADC1	-13.3	4.96	77.8	0.000441	0.00938	3.36
9	39100000	39300000	216000	-	ENSG00000106714	CNTNAP3	NA	protein_coding	NA	CNTNAP3	-13.5	6.04	77.8	0.000441	0.00938	3.36
1	27400000	27500000	85900	-	ENSG00000158195	WASF2	NA	protein_coding	NA	WASF2	5.24	9.4	53.1	0.000441	0.00938	3.36
1	155000000	155000000	15300	-	ENSG00000163354	DCST2	NA	protein_coding	NA	DCST2	-14.2	5.12	77.8	0.000441	0.00938	3.36
19	55100000	55100000	26700	-	ENSG00000125503	PPP1R12C	NA	protein_coding	NA	PPP1R12C	-14.8	5.57	77.6	0.000443	0.00938	3.35
15	101000000	101000000	43900	-	ENSG00000140471	LINS1	NA	protein_coding	NA	LINS1	-13.4	5.13	77.7	0.000443	0.00938	3.35
2	122000000	122000000	30800	+	ENSG00000211460	TSN	NA	protein_coding	NA	TSN	7.26	8.49	53.1	0.000443	0.00938	3.35
15	48800000	49000000	140000	-	ENSG00000185634	SHC4	NA	protein_coding	NA	SHC4	-11.5	4.84	53	0.000444	0.00938	3.35
1	220000000	220000000	5140	-	ENSG00000215817	ZC3H11B	NA	protein_coding	NA	ZC3H11B	-13.4	4.71	77.6	0.000444	0.00938	3.35
8	141000000	141000000	78500	+	ENSG00000105339	DENND3	NA	protein_coding	NA	DENND3	-14.7	6.22	77.3	0.000447	0.00938	3.35
8	110000000	110000000	118000	-	ENSG00000147642	SYBU	NA	protein_coding	NA	SYBU	-11.4	4.74	52.9	0.000447	0.00938	3.35
17	82800000	82900000	194000	+	ENSG00000141556	TBCD	NA	protein_coding	NA	TBCD	-14	4.93	77.2	0.000448	0.00938	3.35
1	167000000	167000000	35100	+	ENSG00000198842	DUSP27	NA	protein_coding	NA	DUSP27	-14.1	5.24	77.3	0.000448	0.00938	3.35
8	22600000	22600000	19700	+	ENSG00000120913	PDLIM2	NA	protein_coding	NA	PDLIM2	-12.7	4.76	52.8	0.000449	0.00938	3.35
2	197000000	197000000	124000	+	ENSG00000144395	CCDC150	NA	protein_coding	NA	CCDC150	-13.3	4.66	77.2	0.000449	0.00938	3.35
2	27600000	27600000	3370	-	ENSG00000176714	CCDC121	NA	protein_coding	NA	CCDC121	-13.4	4.65	77.2	0.000449	0.00938	3.35
19	56800000	56800000	30700	-	ENSG00000198300	PEG3	NA	protein_coding	NA	PEG3	-13.9	4.87	77.2	0.000449	0.00938	3.35
6	33300000	33300000	7290	-	ENSG00000237441	RGL2	NA	protein_coding	NA	RGL2	16	6.61	144	0.000449	0.00938	3.35
1	86500000	86500000	31900	+	ENSG00000016490	CLCA1	NA	protein_coding	NA	CLCA1	-13.5	4.89	77.1	0.00045	0.00938	3.35
10	89700000	89800000	73300	+	ENSG00000138182	KIF20B	NA	protein_coding	NA	KIF20B	-12.7	5.03	77.1	0.00045	0.00938	3.35
15	81300000	81400000	43100	-	ENSG00000188869	TMC3	NA	protein_coding	NA	TMC3	-13.6	5.14	77.1	0.00045	0.00938	3.35
19	7490000	7510000	15500	+	ENSG00000198723	TEX45	NA	protein_coding	NA	TEX45	-14.3	5.31	77.1	0.00045	0.00938	3.35
4	41400000	41700000	340000	+	ENSG00000064042	LIMCH1	NA	protein_coding	NA	LIMCH1	-13.9	5.18	77	0.000451	0.00938	3.35
19	2980000	3000000	17600	+	ENSG00000104953	TLE6	NA	protein_coding	NA	TLE6	-13.1	4.72	77	0.000451	0.00938	3.35
22	42700000	42700000	29200	-	ENSG00000128274	A4GALT	NA	protein_coding	NA	A4GALT	-13.8	4.56	76.9	0.000452	0.00938	3.34
1	33300000	33400000	107000	-	ENSG00000134686	PHC2	NA	protein_coding	NA	PHC2	5.61	8.93	52.6	0.000452	0.00938	3.34
1	44800000	44800000	4590	-	ENSG00000142959	BEST4	NA	protein_coding	NA	BEST4	-11.8	4.95	52.6	0.000452	0.00938	3.34
6	53100000	53100000	48900	+	ENSG00000112146	FBXO9	NA	protein_coding	NA	FBXO9	-13.3	4.89	76.9	0.000453	0.00938	3.34
8	104000000	104000000	137000	-	ENSG00000147647	DPYS	NA	protein_coding	NA	DPYS	-13.4	4.69	76.8	0.000453	0.00938	3.34
10	48200000	48300000	122000	-	ENSG00000170324	FRMPD2	NA	protein_coding	NA	FRMPD2	-13.2	4.96	76.9	0.000453	0.00938	3.34
10	101000000	101000000	10000	+	ENSG00000107819	SFXN3	NA	protein_coding	NA	SFXN3	-13.5	4.72	76.8	0.000454	0.00938	3.34
20	45300000	45300000	11000	+	ENSG00000124232	RBPJL	NA	protein_coding	NA	RBPJL	-13.4	4.78	76.8	0.000454	0.00938	3.34
10	68100000	68200000	106000	+	ENSG00000138347	MYPN	NA	protein_coding	NA	MYPN	-13.8	4.98	76.8	0.000454	0.00938	3.34
13	52000000	52100000	95500	-	ENSG00000197168	NEK5	NA	protein_coding	NA	NEK5	-9.55	4.79	52.6	0.000454	0.00938	3.34
19	45400000	45500000	71500	-	ENSG00000012061	ERCC1	NA	protein_coding	NA	ERCC1	-14.1	4.82	76.7	0.000455	0.00938	3.34
1	19700000	19800000	118000	-	ENSG00000162542	TMCO4	NA	protein_coding	NA	TMCO4	-13.8	4.85	76.7	0.000455	0.00938	3.34
8	39000000	39100000	108000	+	ENSG00000168615	ADAM9	NA	protein_coding	NA	ADAM9	-12.9	4.93	76.7	0.000455	0.00938	3.34
15	41500000	41500000	10300	-	ENSG00000062524	LTK	NA	protein_coding	NA	LTK	-14.2	5.12	76.6	0.000456	0.00938	3.34
19	1350000	1380000	23700	+	ENSG00000160953	PWWP3A	NA	protein_coding	NA	PWWP3A	-14	5.34	76.7	0.000456	0.00938	3.34
19	55200000	55200000	8060	-	ENSG00000167646	DNAAF3	NA	protein_coding	NA	DNAAF3	-15	5.9	76.6	0.000456	0.00938	3.34
7	43900000	43900000	50500	-	ENSG00000106608	URGCP	NA	protein_coding	NA	URGCP	-14.4	5.62	76.5	0.000457	0.00938	3.34
20	25000000	25100000	52800	-	ENSG00000154930	ACSS1	NA	protein_coding	NA	ACSS1	-14.4	5.41	76.6	0.000457	0.00938	3.34
13	28800000	29500000	686000	+	ENSG00000132938	MTUS2	NA	protein_coding	NA	MTUS2	-14.2	4.87	76.5	0.000458	0.00938	3.34
15	66500000	66500000	26500	-	ENSG00000174444	RPL4	NA	protein_coding	NA	RPL4	5.34	8.2	52.4	0.000458	0.00938	3.34
19	38700000	38800000	39700	-	ENSG00000182472	CAPN12	NA	protein_coding	NA	CAPN12	-13.7	5	76.5	0.000458	0.00938	3.34
3	114000000	114000000	17500	+	ENSG00000184307	ZDHHC23	NA	protein_coding	NA	ZDHHC23	-13	4.7	76.5	0.000458	0.00938	3.34
17	36300000	36300000	11100	-	ENSG00000274933	TBC1D3I	NA	protein_coding	NA	TBC1D3I	-16.5	6.97	143	0.000458	0.00938	3.34
11	119000000	119000000	13000	-	ENSG00000076706	MCAM	NA	protein_coding	NA	MCAM	-14.7	4.8	76.4	0.000459	0.00938	3.34
6	25300000	25600000	341000	+	ENSG00000079691	CARMIL1	NA	protein_coding	NA	CARMIL1	-12.4	5.14	52.3	0.00046	0.00938	3.34
15	102000000	102000000	70900	-	ENSG00000185418	TARSL2	NA	protein_coding	NA	TARSL2	-13.9	5.05	76.4	0.00046	0.00938	3.34
19	35300000	35300000	28100	+	ENSG00000012124	CD22	NA	protein_coding	NA	CD22	-11.6	4.28	52.3	0.000461	0.00938	3.34
22	23900000	23900000	29600	+	ENSG00000133460	SLC2A11	NA	protein_coding	NA	SLC2A11	-13.5	4.68	52.2	0.000461	0.00938	3.34
2	137000000	138000000	912000	+	ENSG00000144229	THSD7B	NA	protein_coding	NA	THSD7B	-13.7	5.51	76.3	0.000461	0.00938	3.34
4	103000000	103000000	135000	-	ENSG00000164037	SLC9B1	NA	protein_coding	NA	SLC9B1	-12.3	5.06	76.3	0.000461	0.00938	3.34
19	35600000	35600000	13600	-	ENSG00000105675	ATP4A	NA	protein_coding	NA	ATP4A	-12.9	6.18	52.2	0.000462	0.00938	3.34
14	74700000	74700000	59700	-	ENSG00000119682	AREL1	NA	protein_coding	NA	AREL1	4.48	7.56	52.2	0.000462	0.00938	3.33
12	52400000	52500000	5500	-	ENSG00000185479	KRT6B	NA	protein_coding	NA	KRT6B	-13.8	4.97	76	0.000464	0.00938	3.33
7	93100000	93100000	18500	-	ENSG00000205413	SAMD9	NA	protein_coding	NA	SAMD9	-12.3	5.25	76.1	0.000464	0.00938	3.33
16	22500000	22600000	31200	+	ENSG00000257838	OTOAP1	NA	transcribed_unprocessed_pseudogene	NA	OTOAP1	-13.5	4.78	76.1	0.000464	0.00938	3.33
19	3590000	3610000	12300	-	ENSG00000006638	TBXA2R	NA	protein_coding	NA	TBXA2R	-14.3	5.25	76	0.000465	0.00938	3.33
3	48700000	48700000	12500	-	ENSG00000213672	NCKIPSD	NA	protein_coding	NA	NCKIPSD	-13.7	4.73	76	0.000465	0.00938	3.33
11	62400000	62600000	123000	-	ENSG00000124942	AHNAK	NA	protein_coding	NA	AHNAK	6.79	14.4	52	0.000466	0.00938	3.33
3	44900000	45000000	60900	-	ENSG00000163812	ZDHHC3	NA	protein_coding	NA	ZDHHC3	5.37	9.15	52	0.000466	0.00938	3.33
13	45400000	45400000	25100	-	ENSG00000174032	SLC25A30	NA	protein_coding	NA	SLC25A30	-13.7	5.01	75.9	0.000466	0.00938	3.33
17	9910000	10200000	288000	-	ENSG00000007237	GAS7	NA	protein_coding	NA	GAS7	7.26	9.48	52	0.000467	0.00938	3.33
6	41300000	41400000	15300	+	ENSG00000096264	NCR2	NA	protein_coding	NA	NCR2	-13.8	4.66	75.7	0.000468	0.00938	3.33
6	147000000	147000000	216000	+	ENSG00000118492	ADGB	NA	protein_coding	NA	ADGB	-13.3	6.03	75.7	0.000468	0.00938	3.33
X	142000000	142000000	5480	+	ENSG00000155495	MAGEC1	NA	protein_coding	NA	MAGEC1	-14.2	5.19	75.8	0.000468	0.00938	3.33
20	2380000	2430000	51900	+	ENSG00000166948	TGM6	NA	protein_coding	NA	TGM6	-13.7	4.9	75.7	0.000468	0.00938	3.33
11	117000000	117000000	98700	+	ENSG00000110274	CEP164	NA	protein_coding	NA	CEP164	-13.9	4.53	75.7	0.000469	0.00938	3.33
3	141000000	141000000	139000	+	ENSG00000155893	PXYLP1	NA	protein_coding	NA	PXYLP1	-13.8	5.28	75.7	0.000469	0.00938	3.33
9	88100000	88100000	8990	-	ENSG00000177910	SPATA31C2	NA	unprocessed_pseudogene	NA	SPATA31C2	-15.2	6.34	75.7	0.000469	0.00938	3.33
18	76400000	76500000	138000	-	ENSG00000101493	ZNF516	NA	protein_coding	NA	ZNF516	-12.8	5.71	51.9	0.00047	0.00938	3.33
20	33000000	33000000	12400	+	ENSG00000167104	BPIFB6	NA	protein_coding	NA	BPIFB6	-13.3	4.95	75.6	0.00047	0.00938	3.33
20	20100000	20400000	308000	+	ENSG00000089101	CFAP61	NA	protein_coding	NA	CFAP61	-13.5	4.95	75.5	0.000471	0.00938	3.33
1	155000000	155000000	10500	-	ENSG00000160714	UBE2Q1	NA	protein_coding	NA	UBE2Q1	8.11	11.2	51.8	0.000471	0.00938	3.33
X	47200000	47200000	15600	+	ENSG00000102226	USP11	NA	protein_coding	NA	USP11	-13.7	5.09	75.5	0.000472	0.00938	3.33
20	50700000	50800000	25200	+	ENSG00000124171	PARD6B	NA	protein_coding	NA	PARD6B	-10	4.48	51.7	0.000473	0.00938	3.32
6	73400000	73500000	38800	-	ENSG00000164430	CGAS	NA	protein_coding	NA	CGAS	-14	4.56	75.4	0.000473	0.00938	3.32
15	40600000	40700000	70300	+	ENSG00000137812	KNL1	NA	protein_coding	NA	KNL1	-13	5.52	75.3	0.000474	0.00938	3.32
X	71500000	71600000	42800	+	ENSG00000147162	OGT	NA	protein_coding	NA	OGT	6.92	12	51.7	0.000474	0.00938	3.32
22	29100000	29200000	95300	+	ENSG00000183762	KREMEN1	NA	protein_coding	NA	KREMEN1	-11.9	4.85	51.7	0.000474	0.00938	3.32
20	33400000	33400000	42700	-	ENSG00000101391	CDK5RAP1	NA	protein_coding	NA	CDK5RAP1	-13.9	4.73	75.2	0.000475	0.00938	3.32
11	61300000	61400000	20100	+	ENSG00000149476	TKFC	NA	protein_coding	NA	TKFC	-14.2	5.3	75.2	0.000475	0.00938	3.32
11	61300000	61300000	43100	-	ENSG00000167986	DDB1	NA	protein_coding	NA	DDB1	4.76	9.19	51.6	0.000475	0.00938	3.32
5	69400000	69400000	5270	-	ENSG00000273841	TAF9	NA	protein_coding	NA	TAF9	16	6.61	140	0.000476	0.00938	3.32
6	160000000	160000000	76100	-	ENSG00000112096	SOD2	NA	protein_coding	NA	SOD2	5.88	7.62	51.5	0.000477	0.00938	3.32
2	215000000	215000000	207000	-	ENSG00000144452	ABCA12	NA	protein_coding	NA	ABCA12	-14	5.45	75.1	0.000477	0.00938	3.32
16	28900000	28900000	32100	-	ENSG00000177548	RABEP2	NA	protein_coding	NA	RABEP2	-13.6	4.87	75.1	0.000477	0.00938	3.32
16	25200000	25300000	21800	-	ENSG00000155592	ZKSCAN2	NA	protein_coding	NA	ZKSCAN2	-13.4	4.72	75.1	0.000478	0.00938	3.32
11	117000000	117000000	255000	-	ENSG00000160584	SIK3	NA	protein_coding	NA	SIK3	4.86	6.73	51.5	0.000478	0.00938	3.32
3	43000000	43100000	80900	+	ENSG00000144649	GASK1A	NA	protein_coding	NA	GASK1A	-14.3	4.59	75	0.000479	0.00938	3.32
12	45700000	45900000	178000	+	ENSG00000189079	ARID2	NA	protein_coding	NA	ARID2	6.84	9.04	51.5	0.000479	0.00938	3.32
7	21500000	21900000	359000	+	ENSG00000105877	DNAH11	NA	protein_coding	NA	DNAH11	-15.5	7.06	74.9	0.00048	0.00938	3.32
7	139000000	139000000	66200	-	ENSG00000105939	ZC3HAV1	NA	protein_coding	NA	ZC3HAV1	-9.03	5.75	51.5	0.00048	0.00938	3.32
4	77000000	77100000	28800	-	ENSG00000118816	CCNI	NA	protein_coding	NA	CCNI	8.19	10.1	51.4	0.00048	0.00938	3.32
4	186000000	186000000	371000	-	ENSG00000154556	SORBS2	NA	protein_coding	NA	SORBS2	-14.3	4.9	74.9	0.00048	0.00938	3.32
2	106000000	106000000	149000	+	ENSG00000071051	NCK2	NA	protein_coding	NA	NCK2	-13.6	5.04	74.8	0.000481	0.00938	3.32
10	45700000	45700000	21800	+	ENSG00000230869	AGAP10P	NA	unprocessed_pseudogene	NA	AGAP10P	-14.9	5.7	74.7	0.000482	0.00938	3.32
1	231000000	231000000	17900	+	ENSG00000010072	SPRTN	NA	protein_coding	NA	SPRTN	-13.1	5.2	74.7	0.000483	0.00938	3.32
6	167000000	167000000	34400	+	ENSG00000120440	TTLL2	NA	protein_coding	NA	TTLL2	-13.8	4.87	74.7	0.000483	0.00938	3.32
15	58600000	58700000	161000	-	ENSG00000137845	ADAM10	NA	protein_coding	NA	ADAM10	5.86	10.4	51.3	0.000483	0.00938	3.32
2	55600000	55700000	59800	-	ENSG00000138035	PNPT1	NA	protein_coding	NA	PNPT1	-15	4.96	74.7	0.000483	0.00938	3.32
5	95500000	95600000	93300	-	ENSG00000198677	TTC37	NA	protein_coding	NA	TTC37	-13.5	5.27	74.6	0.000483	0.00938	3.32
1	15700000	15700000	1850	+	ENSG00000215695	RSC1A1	NA	protein_coding	NA	RSC1A1	-12.6	4.89	74.7	0.000483	0.00938	3.32
3	25600000	25700000	67000	-	ENSG00000077097	TOP2B	NA	protein_coding	NA	TOP2B	4.85	10	51.3	0.000484	0.00938	3.32
4	2070000	2240000	170000	-	ENSG00000130997	POLN	NA	protein_coding	NA	POLN	-13.5	5.2	74.6	0.000484	0.00938	3.32
11	62600000	62600000	8650	-	ENSG00000149480	MTA2	NA	protein_coding	NA	MTA2	4.85	8.52	51.3	0.000484	0.00938	3.32
19	58100000	58100000	34600	-	ENSG00000121413	ZSCAN18	NA	protein_coding	NA	ZSCAN18	-14.5	5.2	74.5	0.000486	0.0094	3.31
21	36200000	36300000	137000	+	ENSG00000142197	DOP1B	NA	protein_coding	NA	DOP1B	-15.1	6.36	74.4	0.000487	0.0094	3.31
16	88800000	88800000	5470	+	ENSG00000167513	CDT1	NA	protein_coding	NA	CDT1	-13.7	4.71	74.4	0.000487	0.0094	3.31
1	2020000	2030000	11400	+	ENSG00000187730	GABRD	NA	protein_coding	NA	GABRD	-14.5	4.71	74.4	0.000487	0.0094	3.31
20	3790000	3810000	19400	+	ENSG00000101224	CDC25B	NA	protein_coding	NA	CDC25B	-14.6	5.47	74.3	0.000488	0.0094	3.31
19	52700000	52700000	32300	-	ENSG00000213020	ZNF611	NA	protein_coding	NA	ZNF611	-13.2	5.44	74.3	0.000489	0.0094	3.31
5	161000000	161000000	289000	-	ENSG00000118322	ATP10B	NA	protein_coding	NA	ATP10B	-13.2	4.6	74.2	0.00049	0.0094	3.31
19	15000000	15000000	12600	+	ENSG00000160994	CCDC105	NA	protein_coding	NA	CCDC105	-14	4.77	74.2	0.00049	0.0094	3.31
15	82300000	82300000	22100	+	ENSG00000188659	SAXO2	NA	protein_coding	NA	SAXO2	-13.5	4.86	74.2	0.00049	0.0094	3.31
X	1590000	1600000	10900	+	ENSG00000197976	AKAP17A	NA	protein_coding	NA	AKAP17A	-13.8	4.54	74.2	0.00049	0.0094	3.31
2	234000000	234000000	101000	+	ENSG00000241119	UGT1A9	NA	protein_coding	NA	UGT1A9	-12.8	5.58	74.1	0.000491	0.0094	3.31
12	68600000	68700000	61000	+	ENSG00000127314	RAP1B	NA	protein_coding	NA	RAP1B	7.94	8.52	51	0.000492	0.0094	3.31
3	37500000	37800000	371000	+	ENSG00000144668	ITGA9	NA	protein_coding	NA	ITGA9	-13.6	5.41	74	0.000492	0.0094	3.31
X	37600000	37700000	113000	+	ENSG00000147036	LANCL3	NA	protein_coding	NA	LANCL3	-11.4	4.02	51	0.000492	0.0094	3.31
8	27300000	27300000	26400	-	ENSG00000104228	TRIM35	NA	protein_coding	NA	TRIM35	-13.5	4.94	74	0.000493	0.0094	3.31
4	1350000	1390000	40800	+	ENSG00000163945	UVSSA	NA	protein_coding	NA	UVSSA	-14.7	5.23	74	0.000493	0.0094	3.31
1	233000000	233000000	312000	-	ENSG00000135749	PCNX2	NA	protein_coding	NA	PCNX2	-9.21	5.94	50.9	0.000494	0.0094	3.31
20	18400000	18500000	83900	-	ENSG00000089091	DZANK1	NA	protein_coding	NA	DZANK1	-13.7	5.05	73.9	0.000495	0.0094	3.31
17	44200000	44200000	16600	-	ENSG00000108312	UBTF	NA	protein_coding	NA	UBTF	4.99	8.94	50.7	0.000497	0.0094	3.3
2	67400000	67400000	14800	+	ENSG00000143971	ETAA1	NA	protein_coding	NA	ETAA1	-13.6	4.56	73.7	0.000497	0.0094	3.3
2	201000000	202000000	132000	-	ENSG00000155754	C2CD6	NA	protein_coding	NA	C2CD6	-12.7	5.04	73.8	0.000497	0.0094	3.3
1	85700000	86200000	428000	-	ENSG00000171502	COL24A1	NA	protein_coding	NA	COL24A1	-13.7	5.72	73.6	0.000498	0.0094	3.3
19	21400000	21400000	30500	+	ENSG00000196268	ZNF493	NA	protein_coding	NA	ZNF493	-13.2	5.46	73.6	0.000498	0.0094	3.3
14	88400000	88500000	85400	+	ENSG00000042317	SPATA7	NA	protein_coding	NA	SPATA7	-11.9	4.6	50.7	0.000499	0.0094	3.3
4	125000000	125000000	48700	-	ENSG00000151458	ANKRD50	NA	protein_coding	NA	ANKRD50	-13.2	4.88	73.6	0.000499	0.0094	3.3
16	31200000	31200000	17400	+	ENSG00000177238	TRIM72	NA	protein_coding	NA	TRIM72	-10.9	5.49	50.7	0.000499	0.0094	3.3
8	42400000	42400000	14300	+	ENSG00000078668	VDAC3	NA	protein_coding	NA	VDAC3	6.74	7.95	50.6	0.0005	0.0094	3.3
1	53100000	53100000	23500	+	ENSG00000174348	PODN	NA	protein_coding	NA	PODN	-14.5	5.84	73.5	0.0005	0.0094	3.3
17	44800000	44900000	49500	-	ENSG00000108883	EFTUD2	NA	protein_coding	NA	EFTUD2	5.8	8.65	50.6	0.000501	0.0094	3.3
6	136000000	136000000	276	+	ENSG00000216519	AL023284.1	NA	processed_pseudogene	NA	AL023284.1	16	6.58	136	0.000501	0.0094	3.3
16	57000000	57100000	94000	+	ENSG00000140853	NLRC5	NA	protein_coding	NA	NLRC5	-13.9	5	73.3	0.000503	0.0094	3.3
3	187000000	187000000	6690	+	ENSG00000156976	EIF4A2	NA	protein_coding	NA	EIF4A2	7.36	11.3	50.5	0.000503	0.0094	3.3
2	162000000	162000000	82000	-	ENSG00000197635	DPP4	NA	protein_coding	NA	DPP4	-13.3	5.09	73.3	0.000503	0.0094	3.3
10	30800000	31000000	212000	-	ENSG00000183621	ZNF438	NA	protein_coding	NA	ZNF438	-13.5	4.72	73.3	0.000504	0.0094	3.3
6	28300000	28300000	21000	+	ENSG00000137338	PGBD1	NA	protein_coding	NA	PGBD1	-13.4	4.73	73.2	0.000505	0.0094	3.3
6	139000000	139000000	2840	-	ENSG00000164442	CITED2	NA	protein_coding	NA	CITED2	9.61	13.5	50.5	0.000505	0.0094	3.3
16	11900000	12000000	49400	-	ENSG00000234719	NPIPB2	NA	protein_coding	NA	NPIPB2	-14.2	4.45	73.2	0.000505	0.0094	3.3
X	44000000	44000000	1590	+	ENSG00000214019	AL034370.1	NA	processed_pseudogene	NA	AL034370.1	15.9	6.52	135	0.000507	0.0094	3.29
19	6680000	6730000	52900	-	ENSG00000125730	C3	NA	protein_coding	NA	C3	-14.5	4.96	73	0.000508	0.0094	3.29
15	39600000	39600000	18400	+	ENSG00000137801	THBS1	NA	protein_coding	NA	THBS1	-12.2	4.98	50.3	0.000508	0.0094	3.29
5	141000000	141000000	4100	+	ENSG00000112852	PCDHB2	NA	protein_coding	NA	PCDHB2	-13.5	6.51	50.3	0.000509	0.0094	3.29
8	117000000	117000000	83000	+	ENSG00000147679	UTP23	NA	protein_coding	NA	UTP23	-13.6	4.5	72.9	0.000509	0.0094	3.29
2	160000000	160000000	101000	-	ENSG00000115221	ITGB6	NA	protein_coding	NA	ITGB6	-12.6	4.72	72.8	0.00051	0.0094	3.29
1	85000000	85100000	134000	+	ENSG00000162643	WDR63	NA	protein_coding	NA	WDR63	-14.1	5	72.8	0.00051	0.0094	3.29
7	122000000	122000000	70700	-	ENSG00000008311	AASS	NA	protein_coding	NA	AASS	-13	4.85	72.8	0.000511	0.0094	3.29
3	41200000	41300000	65400	+	ENSG00000168036	CTNNB1	NA	protein_coding	NA	CTNNB1	4.86	7.39	50.2	0.000511	0.0094	3.29
6	36900000	37000000	16600	+	ENSG00000164530	PI16	NA	protein_coding	NA	PI16	-13.7	5.18	72.7	0.000513	0.0094	3.29
6	35800000	35800000	2960	+	ENSG00000196748	CLPSL2	NA	protein_coding	NA	CLPSL2	-13.3	4.74	72.7	0.000513	0.0094	3.29
12	109000000	109000000	79400	-	ENSG00000084112	SSH1	NA	protein_coding	NA	SSH1	-10	4.51	50.1	0.000515	0.0094	3.29
11	130000000	130000000	23700	-	ENSG00000134917	ADAMTS8	NA	protein_coding	NA	ADAMTS8	-13.5	5.08	72.5	0.000515	0.0094	3.29
X	2900000	2930000	25400	-	ENSG00000006756	ARSD	NA	protein_coding	NA	ARSD	-13.4	4.86	72.5	0.000516	0.0094	3.29
X	104000000	104000000	11500	+	ENSG00000133142	TCEAL4	NA	protein_coding	NA	TCEAL4	-13.5	4.53	72.5	0.000516	0.0094	3.29
7	151000000	151000000	4460	+	ENSG00000213199	ASIC3	NA	protein_coding	NA	ASIC3	-14.1	4.85	72.4	0.000517	0.0094	3.29
5	177000000	177000000	3150	+	ENSG00000169230	PRELID1	NA	protein_coding	NA	PRELID1	8.58	10.4	50	0.000518	0.0094	3.29
19	23500000	23700000	162000	-	ENSG00000197372	ZNF675	NA	protein_coding	NA	ZNF675	-9.39	4.72	49.9	0.000518	0.0094	3.29
12	53000000	53000000	36100	+	ENSG00000063046	EIF4B	NA	protein_coding	NA	EIF4B	5.57	9.33	49.9	0.000519	0.0094	3.28
7	90200000	90200000	70500	+	ENSG00000157214	STEAP2	NA	protein_coding	NA	STEAP2	-9.24	4.89	49.9	0.000519	0.0094	3.28
8	26300000	26400000	81200	+	ENSG00000221914	PPP2R2A	NA	protein_coding	NA	PPP2R2A	4.3	9.01	49.9	0.000519	0.0094	3.28
1	104000000	104000000	9260	+	ENSG00000237763	AMY1A	NA	protein_coding	NA	AMY1A	-13.3	4.63	72.3	0.000519	0.0094	3.28
22	26200000	26400000	214000	+	ENSG00000100095	SEZ6L	NA	protein_coding	NA	SEZ6L	-13	4.71	72.2	0.00052	0.0094	3.28
1	236000000	236000000	89300	-	ENSG00000116962	NID1	NA	protein_coding	NA	NID1	-13.1	4.95	72.2	0.00052	0.0094	3.28
19	4470000	4500000	29900	+	ENSG00000167674	HDGFL2	NA	protein_coding	NA	HDGFL2	-13.1	4.75	72.2	0.00052	0.0094	3.28
4	73100000	73300000	185000	-	ENSG00000132466	ANKRD17	NA	protein_coding	NA	ANKRD17	5.38	11.4	49.8	0.000521	0.0094	3.28
5	35600000	35800000	197000	+	ENSG00000152582	SPEF2	NA	protein_coding	NA	SPEF2	-14	5.48	72.2	0.000521	0.0094	3.28
10	70600000	70600000	5410	-	ENSG00000180644	PRF1	NA	protein_coding	NA	PRF1	-13.6	4.9	72.2	0.000521	0.0094	3.28
8	144000000	144000000	2440	+	ENSG00000204791	SMPD5	NA	transcribed_unitary_pseudogene	NA	SMPD5	-15	6.15	72.2	0.000521	0.0094	3.28
7	44500000	44500000	28800	-	ENSG00000015520	NPC1L1	NA	protein_coding	NA	NPC1L1	-13.5	4.5	72.1	0.000522	0.0094	3.28
10	96100000	96200000	75600	+	ENSG00000177853	ZNF518A	NA	protein_coding	NA	ZNF518A	-13.5	5.5	72.1	0.000523	0.0094	3.28
19	1070000	1090000	20700	+	ENSG00000180448	ARHGAP45	NA	protein_coding	NA	ARHGAP45	-14.7	5.72	72	0.000523	0.0094	3.28
4	168000000	169000000	181000	-	ENSG00000181381	DDX60L	NA	protein_coding	NA	DDX60L	-12.8	5.04	72.1	0.000523	0.0094	3.28
19	58500000	58500000	6220	+	ENSG00000249471	ZNF324B	NA	protein_coding	NA	ZNF324B	-15.1	5.88	72	0.000523	0.0094	3.28
19	44100000	44200000	18800	+	ENSG00000263002	ZNF234	NA	protein_coding	NA	ZNF234	-13.5	4.51	72	0.000523	0.0094	3.28
20	62900000	62900000	60200	-	ENSG00000101191	DIDO1	NA	protein_coding	NA	DIDO1	-15.7	7.23	72	0.000524	0.0094	3.28
7	117000000	118000000	250000	+	ENSG00000001626	CFTR	NA	protein_coding	NA	CFTR	-12.9	4.85	71.9	0.000525	0.0094	3.28
1	117000000	117000000	34700	+	ENSG00000134256	CD101	NA	protein_coding	NA	CD101	-12.9	4.76	71.9	0.000525	0.0094	3.28
3	44200000	44300000	90200	+	ENSG00000173769	TOPAZ1	NA	protein_coding	NA	TOPAZ1	-13.6	5.41	71.9	0.000525	0.0094	3.28
1	16900000	16900000	508	+	ENSG00000235241	BX284668.4	NA	processed_pseudogene	NA	BX284668.4	-13.8	4.47	71.9	0.000525	0.0094	3.28
15	72200000	72200000	32800	-	ENSG00000067225	PKM	NA	protein_coding	NA	PKM	5.58	10.1	49.7	0.000526	0.0094	3.28
5	180000000	180000000	160000	-	ENSG00000113269	RNF130	NA	protein_coding	NA	RNF130	9.35	10.9	49.6	0.000527	0.0094	3.28
6	99400000	99400000	27300	-	ENSG00000132424	PNISR	NA	protein_coding	NA	PNISR	4.32	8.83	49.6	0.000527	0.0094	3.28
15	83300000	83300000	28800	-	ENSG00000169594	BNC1	NA	protein_coding	NA	BNC1	-13.9	5.18	71.8	0.000527	0.0094	3.28
20	43500000	43600000	61500	+	ENSG00000185513	L3MBTL1	NA	protein_coding	NA	L3MBTL1	-8.35	4.88	49.6	0.000527	0.0094	3.28
6	34500000	34600000	18500	-	ENSG00000124664	SPDEF	NA	protein_coding	NA	SPDEF	-13.9	4.65	71.7	0.000528	0.0094	3.28
1	152000000	152000000	28200	+	ENSG00000143375	CGN	NA	protein_coding	NA	CGN	-13.6	5	71.7	0.000529	0.0094	3.28
19	32400000	32500000	80400	+	ENSG00000178904	DPY19L3	NA	protein_coding	NA	DPY19L3	-12.4	5.23	49.5	0.000529	0.0094	3.28
1	152000000	152000000	87100	+	ENSG00000143376	SNX27	NA	protein_coding	NA	SNX27	5.3	9	49.5	0.00053	0.0094	3.28
X	101000000	102000000	115000	+	ENSG00000196440	ARMCX4	NA	protein_coding	NA	ARMCX4	-14.5	5.19	71.6	0.00053	0.0094	3.28
9	74700000	74900000	166000	-	ENSG00000119121	TRPM6	NA	protein_coding	NA	TRPM6	-15.1	5.6	71.5	0.000531	0.0094	3.27
17	68900000	69000000	88100	-	ENSG00000141338	ABCA8	NA	protein_coding	NA	ABCA8	-13.3	4.98	71.6	0.000531	0.0094	3.28
4	9370000	9370000	1200	+	ENSG00000205946	USP17L6P	NA	unprocessed_pseudogene	NA	USP17L6P	-13.1	5.36	71.5	0.000531	0.0094	3.27
2	178000000	178000000	14900	-	ENSG00000079150	FKBP7	NA	protein_coding	NA	FKBP7	-12.6	4.73	71.5	0.000532	0.0094	3.27
15	29100000	29600000	450000	-	ENSG00000104059	FAM189A1	NA	protein_coding	NA	FAM189A1	-13.6	3.96	49.4	0.000532	0.0094	3.27
17	11600000	12000000	371000	+	ENSG00000007174	DNAH9	NA	protein_coding	NA	DNAH9	-14	5.95	71.4	0.000533	0.0094	3.27
11	46900000	47200000	228000	+	ENSG00000149179	C11orf49	NA	protein_coding	NA	C11orf49	-13.2	4.59	71.4	0.000534	0.0094	3.27
7	130000000	130000000	48700	-	ENSG00000106477	CEP41	NA	protein_coding	NA	CEP41	-8.07	4.98	49.3	0.000536	0.0094	3.27
1	151000000	151000000	35900	-	ENSG00000143393	PI4KB	NA	protein_coding	NA	PI4KB	5.13	8.42	49.3	0.000536	0.0094	3.27
3	112000000	112000000	153000	-	ENSG00000172139	SLC9C1	NA	protein_coding	NA	SLC9C1	-13.4	4.77	71.3	0.000536	0.0094	3.27
18	31400000	31500000	31000	+	ENSG00000134757	DSG3	NA	protein_coding	NA	DSG3	-12	4.98	71.2	0.000537	0.0094	3.27
11	78700000	79400000	788000	-	ENSG00000149256	TENM4	NA	protein_coding	NA	TENM4	-7.37	6.69	49.3	0.000537	0.0094	3.27
5	33500000	33900000	368000	-	ENSG00000151388	ADAMTS12	NA	protein_coding	NA	ADAMTS12	-13.4	4.98	71.2	0.000537	0.0094	3.27
6	32000000	32000000	20600	+	ENSG00000244731	C4A	NA	protein_coding	NA	C4A	-15.2	5.69	71.1	0.000538	0.0094	3.27
2	70600000	70800000	161000	-	ENSG00000075340	ADD2	NA	protein_coding	NA	ADD2	-14.8	5.41	71.1	0.000539	0.0094	3.27
6	155000000	155000000	60500	-	ENSG00000074771	NOX3	NA	protein_coding	NA	NOX3	-12.4	4.81	71	0.00054	0.0094	3.27
15	42400000	42500000	78300	-	ENSG00000103994	ZNF106	NA	protein_coding	NA	ZNF106	4.61	9.53	49.1	0.00054	0.0094	3.27
10	33200000	33300000	159000	-	ENSG00000099250	NRP1	NA	protein_coding	NA	NRP1	-11.8	4.38	49.1	0.000541	0.0094	3.27
3	47600000	47600000	18600	-	ENSG00000114646	CSPG5	NA	protein_coding	NA	CSPG5	-13.5	4.68	70.9	0.000541	0.0094	3.27
6	151000000	151000000	244000	+	ENSG00000120278	PLEKHG1	NA	protein_coding	NA	PLEKHG1	-14	4.53	71	0.000541	0.0094	3.27
3	157000000	157000000	14300	-	ENSG00000163660	CCNL1	NA	protein_coding	NA	CCNL1	5.7	9.27	49.1	0.000542	0.0094	3.27
3	143000000	143000000	96200	+	ENSG00000163714	U2SURP	NA	protein_coding	NA	U2SURP	4.98	9.03	49.1	0.000542	0.0094	3.27
10	38000000	38100000	54400	+	ENSG00000189180	ZNF33A	NA	protein_coding	NA	ZNF33A	-14	5.45	70.9	0.000542	0.0094	3.27
10	101000000	101000000	16400	+	ENSG00000095539	SEMA4G	NA	protein_coding	NA	SEMA4G	-13.3	4.83	70.8	0.000543	0.0094	3.27
20	35500000	35600000	15600	+	ENSG00000125991	ERGIC3	NA	protein_coding	NA	ERGIC3	4.38	8.24	49	0.000543	0.0094	3.26
1	166000000	166000000	36600	-	ENSG00000143149	ALDH9A1	NA	protein_coding	NA	ALDH9A1	-13.1	4.74	70.8	0.000543	0.0094	3.27
7	55400000	55600000	137000	-	ENSG00000154978	VOPP1	NA	protein_coding	NA	VOPP1	-12.6	4.61	70.8	0.000543	0.0094	3.27
21	18300000	18500000	217000	-	ENSG00000154646	TMPRSS15	NA	protein_coding	NA	TMPRSS15	-13.1	5.4	70.8	0.000544	0.0094	3.26
21	10400000	10500000	103000	+	ENSG00000187172	BAGE2	NA	transcribed_unprocessed_pseudogene	NA	BAGE2	-13.7	5.59	70.8	0.000544	0.0094	3.26
2	161000000	161000000	103000	+	ENSG00000115233	PSMD14	NA	protein_coding	NA	PSMD14	6.59	9.22	49	0.000545	0.0094	3.26
18	9100000	9130000	31700	+	ENSG00000178127	NDUFV2	NA	protein_coding	NA	NDUFV2	5.83	9.03	49	0.000545	0.0094	3.26
6	35300000	35400000	85600	+	ENSG00000112033	PPARD	NA	protein_coding	NA	PPARD	-4.99	6.73	48.9	0.000546	0.0094	3.26
7	5430000	5510000	82500	-	ENSG00000155034	FBXL18	NA	protein_coding	NA	FBXL18	-6.6	5.61	48.9	0.000546	0.0094	3.26
11	62700000	62700000	37100	-	ENSG00000234857	HNRNPUL2-BSCL2	NA	protein_coding	NA	HNRNPUL2-BSCL2	5.31	9.07	48.9	0.000546	0.0094	3.26
12	121000000	121000000	91700	-	ENSG00000089053	ANAPC5	NA	protein_coding	NA	ANAPC5	5.18	8.73	48.9	0.000547	0.0094	3.26
16	21200000	21200000	17100	-	ENSG00000103310	ZP2	NA	protein_coding	NA	ZP2	-13.2	4.55	70.6	0.000547	0.0094	3.26
1	158000000	158000000	39100	-	ENSG00000143297	FCRL5	NA	protein_coding	NA	FCRL5	-14.3	5.19	70.6	0.000547	0.0094	3.26
6	154000000	155000000	123000	-	ENSG00000153721	CNKSR3	NA	protein_coding	NA	CNKSR3	-12.4	4.91	70.5	0.000548	0.0094	3.26
10	46600000	46600000	16000	+	ENSG00000204176	SYT15	NA	protein_coding	NA	SYT15	-15.3	6.09	70.5	0.000549	0.0094	3.26
3	48600000	48600000	9770	-	ENSG00000225697	SLC26A6	NA	protein_coding	NA	SLC26A6	-14.9	4.59	70.5	0.000549	0.0094	3.26
6	137000000	137000000	22000	-	ENSG00000027697	IFNGR1	NA	protein_coding	NA	IFNGR1	-13.7	4.45	70.4	0.00055	0.0094	3.26
17	44800000	44800000	22900	+	ENSG00000073670	ADAM11	NA	protein_coding	NA	ADAM11	-14	4.56	70.4	0.00055	0.0094	3.26
4	25700000	25900000	116000	-	ENSG00000091490	SEL1L3	NA	protein_coding	NA	SEL1L3	-13.4	5.16	70.4	0.00055	0.0094	3.26
19	55700000	55700000	20600	+	ENSG00000063244	U2AF2	NA	protein_coding	NA	U2AF2	5.27	9.86	48.7	0.000551	0.0094	3.26
6	150000000	150000000	62000	+	ENSG00000120265	PCMT1	NA	protein_coding	NA	PCMT1	4.76	7.12	48.8	0.000551	0.0094	3.26
3	15600000	15600000	41200	-	ENSG00000131373	HACL1	NA	protein_coding	NA	HACL1	-13.5	4.55	70.4	0.000551	0.0094	3.26
11	108000000	108000000	65400	-	ENSG00000149308	NPAT	NA	protein_coding	NA	NPAT	-13	4.83	70.4	0.000551	0.0094	3.26
6	44800000	45400000	569000	-	ENSG00000196284	SUPT3H	NA	protein_coding	NA	SUPT3H	7.11	7.46	48.8	0.000551	0.0094	3.26
10	46900000	47000000	91100	+	ENSG00000204179	PTPN20	NA	protein_coding	NA	PTPN20	-13.4	5.85	70.3	0.000551	0.0094	3.26
19	24000000	24100000	96600	+	ENSG00000213096	ZNF254	NA	protein_coding	NA	ZNF254	-13.6	4.95	70.3	0.000551	0.0094	3.26
5	110000000	111000000	450000	-	ENSG00000186952	TMEM232	NA	protein_coding	NA	TMEM232	-12.8	4.92	70.3	0.000552	0.0094	3.26
2	61500000	61500000	60800	-	ENSG00000082898	XPO1	NA	protein_coding	NA	XPO1	6.31	9.62	48.7	0.000554	0.0094	3.26
3	37100000	37100000	445	+	ENSG00000225558	UBE2D3P2	NA	processed_pseudogene	NA	UBE2D3P2	16	6.59	128	0.000554	0.0094	3.26
7	149000000	149000000	103000	+	ENSG00000055130	CUL1	NA	protein_coding	NA	CUL1	4.99	7.9	48.6	0.000555	0.0094	3.26
19	46000000	46000000	25900	+	ENSG00000104983	CCDC61	NA	protein_coding	NA	CCDC61	-13.5	4.47	70.1	0.000555	0.0094	3.26
17	28900000	28900000	18400	-	ENSG00000132589	FLOT2	NA	protein_coding	NA	FLOT2	6.42	6.28	48.6	0.000555	0.0094	3.26
2	183000000	183000000	78400	+	ENSG00000077232	DNAJC10	NA	protein_coding	NA	DNAJC10	5.33	7.36	48.6	0.000556	0.0094	3.26
15	88900000	88900000	18300	-	ENSG00000140511	HAPLN3	NA	protein_coding	NA	HAPLN3	-13.8	4.6	70.1	0.000556	0.0094	3.26
21	43600000	43600000	467	+	ENSG00000234289	H2BFS	NA	protein_coding	NA	H2BFS	-14.1	4.4	70.1	0.000556	0.0094	3.26
12	51400000	51500000	124000	+	ENSG00000050438	SLC4A8	NA	protein_coding	NA	SLC4A8	-13.4	5.14	70	0.000557	0.0094	3.25
3	81500000	81800000	272000	-	ENSG00000114480	GBE1	NA	protein_coding	NA	GBE1	-13.6	4.86	70	0.000557	0.0094	3.25
10	114000000	114000000	55200	+	ENSG00000165816	VWA2	NA	protein_coding	NA	VWA2	-13.5	4.86	70	0.000557	0.0094	3.25
19	19300000	19300000	8050	-	ENSG00000187664	HAPLN4	NA	protein_coding	NA	HAPLN4	-14.3	4.74	70	0.000557	0.0094	3.25
19	10300000	10300000	8160	+	ENSG00000105364	MRPL4	NA	protein_coding	NA	MRPL4	-13.6	4.57	70	0.000558	0.0094	3.25
2	73400000	73600000	239000	+	ENSG00000116127	ALMS1	NA	protein_coding	NA	ALMS1	-15.8	6.54	69.9	0.000558	0.0094	3.25
19	751000	764000	13200	+	ENSG00000099812	MISP	NA	protein_coding	NA	MISP	-14.7	4.94	69.9	0.000559	0.0094	3.25
3	151000000	151000000	33300	-	ENSG00000152580	IGSF10	NA	protein_coding	NA	IGSF10	-5.46	6.15	48.5	0.000559	0.0094	3.25
5	141000000	142000000	182000	+	ENSG00000204956	PCDHGA1	NA	protein_coding	NA	PCDHGA1	-14.2	4.91	69.8	0.00056	0.0094	3.25
X	120000000	120000000	41500	-	ENSG00000005893	LAMP2	NA	protein_coding	NA	LAMP2	4.75	6.77	48.4	0.000561	0.0094	3.25
5	168000000	168000000	181000	+	ENSG00000113645	WWC1	NA	protein_coding	NA	WWC1	-7.64	5.07	48.4	0.000561	0.0094	3.25
2	27100000	27100000	7790	+	ENSG00000138080	EMILIN1	NA	protein_coding	NA	EMILIN1	-14.2	5.45	69.8	0.000561	0.0094	3.25
6	36900000	36900000	57100	+	ENSG00000198663	C6orf89	NA	protein_coding	NA	C6orf89	-13.5	5.02	69.8	0.000561	0.0094	3.25
20	46000000	46000000	7650	+	ENSG00000100985	MMP9	NA	protein_coding	NA	MMP9	-13.8	4.43	69.7	0.000562	0.0094	3.25
19	45800000	45800000	19600	-	ENSG00000104941	RSPH6A	NA	protein_coding	NA	RSPH6A	-13.8	4.99	69.7	0.000562	0.0094	3.25
1	15700000	15700000	5480	+	ENSG00000162460	TMEM82	NA	protein_coding	NA	TMEM82	-14.4	5.24	69.7	0.000562	0.0094	3.25
7	45600000	45700000	149000	+	ENSG00000164742	ADCY1	NA	protein_coding	NA	ADCY1	-13.5	5.11	48.4	0.000562	0.0094	3.25
19	52500000	52600000	36800	+	ENSG00000198482	ZNF808	NA	protein_coding	NA	ZNF808	-12.4	4.83	69.7	0.000562	0.0094	3.25
6	158000000	158000000	58800	-	ENSG00000122335	SERAC1	NA	protein_coding	NA	SERAC1	-9.7	4.75	48.3	0.000563	0.0094	3.25
6	132000000	132000000	119000	+	ENSG00000154269	ENPP3	NA	protein_coding	NA	ENPP3	-13.4	4.83	69.7	0.000563	0.0094	3.25
3	14100000	14200000	33600	-	ENSG00000154767	XPC	NA	protein_coding	NA	XPC	-14.3	5.85	69.7	0.000563	0.0094	3.25
6	52300000	52300000	20900	-	ENSG00000112118	MCM3	NA	protein_coding	NA	MCM3	-5.92	5.75	48.3	0.000565	0.0094	3.25
1	197000000	197000000	210000	+	ENSG00000134376	CRB1	NA	protein_coding	NA	CRB1	-11.6	5.15	48.3	0.000565	0.0094	3.25
1	231000000	231000000	51500	+	ENSG00000135775	COG2	NA	protein_coding	NA	COG2	-13.5	4.99	69.6	0.000565	0.0094	3.25
16	16300000	16400000	33100	+	ENSG00000183889	AC138969.1	NA	protein_coding	NA	AC138969.1	-13.1	6.03	69.5	0.000565	0.0094	3.25
11	3380000	3410000	28000	+	ENSG00000223756	TSSC2	NA	transcribed_unprocessed_pseudogene	NA	TSSC2	-13.6	4.68	69.6	0.000565	0.0094	3.25
X	119000000	119000000	71900	-	ENSG00000250423	KIAA1210	NA	protein_coding	NA	KIAA1210	-13.7	4.67	69.5	0.000566	0.0094	3.25
X	74700000	74900000	193000	-	ENSG00000050030	NEXMIF	NA	protein_coding	NA	NEXMIF	-10.6	4.73	48.2	0.000567	0.0094	3.25
1	207000000	207000000	48900	+	ENSG00000143479	DYRK3	NA	protein_coding	NA	DYRK3	-12.7	4.82	69.4	0.000568	0.0094	3.25
6	161000000	161000000	126000	+	ENSG00000085511	MAP3K4	NA	protein_coding	NA	MAP3K4	-13.7	5.83	69.3	0.000569	0.0094	3.24
19	22400000	22500000	141000	-	ENSG00000197360	ZNF98	NA	protein_coding	NA	ZNF98	-12.7	4.98	69.4	0.000569	0.0094	3.25
12	64800000	64900000	101000	+	ENSG00000111490	TBC1D30	NA	protein_coding	NA	TBC1D30	-14	4.94	69.3	0.00057	0.0094	3.24
1	230000000	230000000	34000	+	ENSG00000135763	URB2	NA	protein_coding	NA	URB2	-14.6	5.61	69.3	0.00057	0.0094	3.24
12	105000000	105000000	62900	-	ENSG00000136044	APPL2	NA	protein_coding	NA	APPL2	-12.7	4.65	69.3	0.00057	0.0094	3.24
1	155000000	155000000	5130	+	ENSG00000173171	MTX1	NA	protein_coding	NA	MTX1	-14	4.92	69.3	0.00057	0.0094	3.24
1	151000000	151000000	4240	+	ENSG00000143443	C1orf56	NA	protein_coding	NA	C1orf56	-13.4	4.55	69.2	0.000572	0.0094	3.24
X	103000000	103000000	5560	+	ENSG00000158301	GPRASP2	NA	protein_coding	NA	GPRASP2	-13	4.54	69.2	0.000572	0.0094	3.24
19	20000000	20000000	42400	-	ENSG00000197124	ZNF682	NA	protein_coding	NA	ZNF682	-13.1	4.62	69.1	0.000573	0.0094	3.24
9	75900000	76400000	472000	+	ENSG00000099139	PCSK5	NA	protein_coding	NA	PCSK5	-13.6	5.41	69.1	0.000574	0.0094	3.24
19	23300000	23400000	90500	-	ENSG00000167232	ZNF91	NA	protein_coding	NA	ZNF91	-13.4	4.85	69.1	0.000574	0.0094	3.24
11	123000000	123000000	77300	+	ENSG00000109944	JHY	NA	protein_coding	NA	JHY	-13.3	4.66	69	0.000575	0.0094	3.24
6	37200000	37300000	46000	-	ENSG00000172738	TMEM217	NA	protein_coding	NA	TMEM217	-13.7	4.84	69	0.000575	0.0094	3.24
19	57800000	57800000	26500	+	ENSG00000269343	ZNF587B	NA	protein_coding	NA	ZNF587B	-13.7	5.14	69	0.000575	0.0094	3.24
6	84700000	84800000	77200	-	ENSG00000112837	TBX18	NA	protein_coding	NA	TBX18	-13.2	5.1	69	0.000576	0.0094	3.24
8	25200000	25400000	233000	+	ENSG00000147459	DOCK5	NA	protein_coding	NA	DOCK5	-7.04	6.09	47.9	0.000577	0.0094	3.24
15	92700000	92700000	20700	-	ENSG00000258741	H2AFVP1	NA	transcribed_processed_pseudogene	NA	H2AFVP1	13.9	4.78	68.9	0.000577	0.0094	3.24
19	21900000	22000000	78000	-	ENSG00000160321	ZNF208	NA	protein_coding	NA	ZNF208	-14.1	6.22	68.9	0.000578	0.0094	3.24
11	61300000	61300000	37000	-	ENSG00000167992	VWCE	NA	protein_coding	NA	VWCE	-13.9	4.67	68.9	0.000578	0.0094	3.24
17	35100000	35200000	41500	+	ENSG00000141161	UNC45B	NA	protein_coding	NA	UNC45B	-13	4.84	68.7	0.00058	0.0094	3.24
6	142000000	142000000	144000	+	ENSG00000112414	ADGRG6	NA	protein_coding	NA	ADGRG6	-13	5	68.7	0.000581	0.0094	3.24
19	33000000	33100000	86300	-	ENSG00000131941	RHPN2	NA	protein_coding	NA	RHPN2	-13.1	4.76	68.7	0.000581	0.0094	3.24
12	109000000	109000000	31300	-	ENSG00000139445	FOXN4	NA	protein_coding	NA	FOXN4	-14.3	5.09	68.7	0.000581	0.0094	3.24
4	1810000	1860000	44700	-	ENSG00000168924	LETM1	NA	protein_coding	NA	LETM1	-13	4.64	68.6	0.000582	0.0094	3.23
3	52800000	52800000	14500	+	ENSG00000055957	ITIH1	NA	protein_coding	NA	ITIH1	-13.1	5.03	68.6	0.000583	0.0094	3.23
19	51600000	51600000	21200	+	ENSG00000105497	ZNF175	NA	protein_coding	NA	ZNF175	-12.4	4.78	47.7	0.000583	0.0094	3.23
9	99900000	100000000	67900	+	ENSG00000136874	STX17	NA	protein_coding	NA	STX17	6.45	6.9	47.7	0.000584	0.0094	3.23
12	48000000	48000000	31600	-	ENSG00000139219	COL2A1	NA	protein_coding	NA	COL2A1	-14	5.06	68.5	0.000584	0.0094	3.23
3	183000000	183000000	251000	-	ENSG00000053524	MCF2L2	NA	protein_coding	NA	MCF2L2	-7.81	4.54	47.7	0.000585	0.0094	3.23
1	11800000	11800000	21200	-	ENSG00000177000	MTHFR	NA	protein_coding	NA	MTHFR	-13.9	5.31	68.5	0.000585	0.0094	3.23
1	36200000	36300000	80900	+	ENSG00000054118	THRAP3	NA	protein_coding	NA	THRAP3	4.6	8.19	47.6	0.000586	0.0094	3.23
19	29900000	30000000	93000	+	ENSG00000105176	URI1	NA	protein_coding	NA	URI1	-12.4	4.8	68.4	0.000586	0.0094	3.23
4	67500000	67500000	76700	-	ENSG00000145241	CENPC	NA	protein_coding	NA	CENPC	-10.9	4.7	47.6	0.000586	0.0094	3.23
2	124000000	125000000	890000	+	ENSG00000155052	CNTNAP5	NA	protein_coding	NA	CNTNAP5	-14	5.07	68.4	0.000586	0.0094	3.23
3	123000000	123000000	53800	-	ENSG00000169087	HSPBAP1	NA	protein_coding	NA	HSPBAP1	-13.3	4.42	68.4	0.000586	0.0094	3.23
15	78600000	78600000	28200	-	ENSG00000080644	CHRNA3	NA	protein_coding	NA	CHRNA3	-13.8	5.46	68.4	0.000587	0.0094	3.23
X	87500000	87700000	153000	+	ENSG00000102271	KLHL4	NA	protein_coding	NA	KLHL4	-12.2	4.65	68.4	0.000587	0.0094	3.23
13	28100000	28300000	157000	+	ENSG00000152520	PAN3	NA	protein_coding	NA	PAN3	6.27	8.44	47.6	0.000587	0.0094	3.23
19	48700000	48700000	20000	-	ENSG00000105538	RASIP1	NA	protein_coding	NA	RASIP1	-14.3	4.42	68.3	0.000588	0.0094	3.23
10	17100000	17200000	64700	-	ENSG00000107614	TRDMT1	NA	protein_coding	NA	TRDMT1	-12.8	5.53	47.6	0.000588	0.0094	3.23
20	49900000	50000000	17600	+	ENSG00000124226	RNF114	NA	protein_coding	NA	RNF114	6.37	7.67	47.5	0.000588	0.0094	3.23
1	146000000	146000000	85200	-	ENSG00000265491	RNF115	NA	protein_coding	NA	RNF115	4.59	7.08	47.5	0.000588	0.0094	3.23
10	132000000	132000000	18800	+	ENSG00000151640	DPYSL4	NA	protein_coding	NA	DPYSL4	-14	4.53	68.3	0.000589	0.0094	3.23
7	64500000	64600000	43200	-	ENSG00000173041	ZNF680	NA	protein_coding	NA	ZNF680	-12.7	4.94	68.2	0.000589	0.0094	3.23
10	134000000	134000000	40800	+	ENSG00000130649	CYP2E1	NA	protein_coding	NA	CYP2E1	-13.5	4.47	68.2	0.00059	0.0094	3.23
7	108000000	108000000	37800	-	ENSG00000091138	SLC26A3	NA	protein_coding	NA	SLC26A3	-12.9	4.47	68.2	0.000591	0.0094	3.23
9	82000000	82000000	6480	+	ENSG00000214929	SPATA31D1	NA	protein_coding	NA	SPATA31D1	-14.3	5.73	68.1	0.000591	0.0094	3.23
X	136000000	136000000	8350	-	ENSG00000269096	CT45A3	NA	protein_coding	NA	CT45A3	-14.4	5.45	68.1	0.000592	0.0094	3.23
7	2510000	2530000	16600	+	ENSG00000106003	LFNG	NA	protein_coding	NA	LFNG	-12.2	5.03	47.4	0.000593	0.0094	3.23
3	66100000	66400000	255000	+	ENSG00000144741	SLC25A26	NA	protein_coding	NA	SLC25A26	-13.7	4.6	68.1	0.000593	0.0094	3.23
22	21400000	21400000	6100	+	ENSG00000274600	RIMBP3B	NA	protein_coding	NA	RIMBP3B	-15.7	6.2	124	0.000593	0.0094	3.23
1	38800000	38900000	21600	-	ENSG00000116954	RRAGC	NA	protein_coding	NA	RRAGC	6.62	8.3	47.4	0.000594	0.0094	3.23
5	91400000	91400000	457	+	ENSG00000240388	AC008799.1	NA	processed_pseudogene	NA	AC008799.1	15.8	6.38	123	0.000594	0.0094	3.23
8	26400000	26500000	123000	+	ENSG00000104765	BNIP3L	NA	protein_coding	NA	BNIP3L	4.78	7.71	47.3	0.000595	0.0094	3.23
19	57800000	57900000	15300	+	ENSG00000198466	ZNF587	NA	protein_coding	NA	ZNF587	-13.9	5.2	67.9	0.000595	0.0094	3.23
20	4850000	5010000	158000	-	ENSG00000089057	SLC23A2	NA	protein_coding	NA	SLC23A2	4.18	7.81	47.3	0.000596	0.0094	3.22
15	65400000	65400000	41500	-	ENSG00000103742	IGDCC4	NA	protein_coding	NA	IGDCC4	-15.3	5.82	67.9	0.000596	0.0094	3.22
2	10900000	10900000	2290	+	ENSG00000162975	KCNF1	NA	protein_coding	NA	KCNF1	-13.4	4.58	67.9	0.000596	0.0094	3.22
3	58700000	59100000	333000	-	ENSG00000163689	C3orf67	NA	protein_coding	NA	C3orf67	-13.4	5.37	67.9	0.000596	0.0094	3.22
7	100000000	100000000	43900	+	ENSG00000066923	STAG3	NA	protein_coding	NA	STAG3	-13.5	4.83	67.9	0.000597	0.0094	3.22
6	44200000	44300000	7720	+	ENSG00000096384	HSP90AB1	NA	protein_coding	NA	HSP90AB1	-13.9	4.83	67.9	0.000597	0.0094	3.22
18	31100000	31200000	33600	-	ENSG00000134765	DSC1	NA	protein_coding	NA	DSC1	-12.4	4.87	67.8	0.000597	0.0094	3.22
2	232000000	232000000	4170	+	ENSG00000163283	ALPP	NA	protein_coding	NA	ALPP	-15.2	5.7	67.9	0.000597	0.0094	3.22
19	1510000	1510000	8580	-	ENSG00000185761	ADAMTSL5	NA	protein_coding	NA	ADAMTSL5	-14.1	5.33	67.8	0.000598	0.0094	3.22
X	121000000	121000000	2050	-	ENSG00000226685	CT47A12	NA	protein_coding	NA	CT47A12	-17.6	8.81	67.8	0.000598	0.0094	3.22
13	24800000	24900000	116000	+	ENSG00000132972	RNF17	NA	protein_coding	NA	RNF17	-12.6	4.58	67.8	0.000599	0.0094	3.22
1	174000000	174000000	103000	-	ENSG00000162753	SLC9C2	NA	protein_coding	NA	SLC9C2	-13	5.01	67.7	0.000599	0.0094	3.22
7	129000000	129000000	54000	+	ENSG00000128578	STRIP2	NA	protein_coding	NA	STRIP2	-13.4	4.54	67.7	0.0006	0.0094	3.22
2	48700000	48800000	69000	-	ENSG00000138039	LHCGR	NA	protein_coding	NA	LHCGR	-13.3	4.46	67.7	0.0006	0.0094	3.22
11	66500000	66500000	23000	+	ENSG00000174483	BBS1	NA	protein_coding	NA	BBS1	-13.1	4.75	67.7	0.0006	0.0094	3.22
5	116000000	117000000	131000	-	ENSG00000092421	SEMA6A	NA	protein_coding	NA	SEMA6A	-11.7	4.54	47.1	0.000601	0.0094	3.22
2	241000000	241000000	89800	-	ENSG00000115677	HDLBP	NA	protein_coding	NA	HDLBP	5.7	8.1	47.1	0.000601	0.0094	3.22
1	74600000	74700000	106000	-	ENSG00000178965	ERICH3	NA	protein_coding	NA	ERICH3	-14.6	5.92	67.7	0.000601	0.0094	3.22
1	182000000	183000000	151000	+	ENSG00000121446	RGSL1	NA	protein_coding	NA	RGSL1	-12.8	4.81	67.6	0.000602	0.0094	3.22
15	65200000	65200000	16700	-	ENSG00000138615	CILP	NA	protein_coding	NA	CILP	-13	5.04	67.6	0.000602	0.0094	3.22
12	753000	911000	159000	+	ENSG00000060237	WNK1	NA	protein_coding	NA	WNK1	4.98	8.15	47.1	0.000603	0.0094	3.22
19	16500000	16500000	25000	+	ENSG00000105072	C19orf44	NA	protein_coding	NA	C19orf44	-13.6	4.71	67.6	0.000603	0.0094	3.22
2	84500000	84800000	303000	+	ENSG00000115423	DNAH6	NA	protein_coding	NA	DNAH6	-13.7	6.06	67.5	0.000603	0.0094	3.22
15	57400000	57600000	175000	+	ENSG00000128849	CGNL1	NA	protein_coding	NA	CGNL1	-13.4	4.69	67.6	0.000603	0.0094	3.22
14	105000000	105000000	26400	-	ENSG00000142208	AKT1	NA	protein_coding	NA	AKT1	6.63	9.64	47.1	0.000603	0.0094	3.22
6	109000000	109000000	189000	+	ENSG00000203799	CCDC162P	NA	transcribed_unitary_pseudogene	NA	CCDC162P	-13	4.67	67.6	0.000603	0.0094	3.22
5	180000000	181000000	84000	+	ENSG00000113300	CNOT6	NA	protein_coding	NA	CNOT6	6.22	8.4	47	0.000604	0.0094	3.22
6	84100000	84200000	103000	-	ENSG00000135315	CEP162	NA	protein_coding	NA	CEP162	-12.3	4.76	67.5	0.000604	0.0094	3.22
2	43800000	43800000	26400	-	ENSG00000138075	ABCG5	NA	protein_coding	NA	ABCG5	-13	4.49	67.5	0.000604	0.0094	3.22
16	1330000	1350000	15800	+	ENSG00000007516	BAIAP3	NA	protein_coding	NA	BAIAP3	-14.6	5.83	67.4	0.000606	0.0094	3.22
20	6070000	6120000	48700	-	ENSG00000101311	FERMT1	NA	protein_coding	NA	FERMT1	-12.6	4.99	67.4	0.000606	0.0094	3.22
1	115000000	115000000	87600	-	ENSG00000175984	DENND2C	NA	protein_coding	NA	DENND2C	-9.77	5.13	47	0.000606	0.0094	3.22
1	27000000	27000000	7830	-	ENSG00000158246	TENT5B	NA	protein_coding	NA	TENT5B	-13.5	4.42	67.4	0.000607	0.0094	3.22
5	80000000	80100000	92000	+	ENSG00000113296	THBS4	NA	protein_coding	NA	THBS4	-13.1	4.49	67.3	0.000609	0.0094	3.22
19	43800000	43900000	24700	+	ENSG00000167637	ZNF283	NA	protein_coding	NA	ZNF283	-13.4	4.92	67.2	0.000609	0.0094	3.22
9	89300000	89400000	41200	+	ENSG00000187742	SECISBP2	NA	protein_coding	NA	SECISBP2	-12.8	4.8	67.2	0.000609	0.0094	3.22
13	26600000	26700000	131000	+	ENSG00000132970	WASF3	NA	protein_coding	NA	WASF3	-12.1	4.48	46.9	0.00061	0.0094	3.21
4	8370000	8440000	74400	-	ENSG00000087008	ACOX3	NA	protein_coding	NA	ACOX3	-13.7	4.56	67.1	0.000611	0.0094	3.21
3	113000000	113000000	52700	-	ENSG00000091986	CCDC80	NA	protein_coding	NA	CCDC80	-12.4	4.7	67.1	0.000611	0.0094	3.21
14	60200000	60300000	53300	+	ENSG00000100614	PPM1A	NA	protein_coding	NA	PPM1A	7.04	8.95	46.8	0.000611	0.0094	3.21
14	60100000	60200000	77200	+	ENSG00000126773	PCNX4	NA	protein_coding	NA	PCNX4	-13.1	4.46	67.1	0.000611	0.0094	3.21
3	44800000	44900000	112000	+	ENSG00000163808	KIF15	NA	protein_coding	NA	KIF15	-13.1	5.06	67.2	0.000611	0.0094	3.21
15	40800000	40900000	14200	+	ENSG00000166145	SPINT1	NA	protein_coding	NA	SPINT1	-13.6	4.62	67.1	0.000611	0.0094	3.21
4	7040000	7040000	2150	-	ENSG00000173013	CCDC96	NA	protein_coding	NA	CCDC96	-15	5.63	67.1	0.000611	0.0094	3.21
17	82000000	82000000	7850	+	ENSG00000169683	LRRC45	NA	protein_coding	NA	LRRC45	-13.9	4.71	67.1	0.000612	0.0094	3.21
3	93900000	94000000	107000	-	ENSG00000184500	PROS1	NA	protein_coding	NA	PROS1	-12.1	4.81	67.1	0.000612	0.0094	3.21
7	136000000	136000000	90800	+	ENSG00000155561	NUP205	NA	protein_coding	NA	NUP205	5.32	6.95	46.8	0.000613	0.0094	3.21
6	35200000	35300000	39100	+	ENSG00000146197	SCUBE3	NA	protein_coding	NA	SCUBE3	-6.01	7.17	46.8	0.000614	0.0094	3.21
3	52800000	52800000	14200	+	ENSG00000162267	ITIH3	NA	protein_coding	NA	ITIH3	-13.9	4.49	67	0.000614	0.0094	3.21
12	88000000	88100000	93100	-	ENSG00000198707	CEP290	NA	protein_coding	NA	CEP290	-13	4.84	67	0.000614	0.0094	3.21
11	73300000	73400000	61100	+	ENSG00000110237	ARHGEF17	NA	protein_coding	NA	ARHGEF17	-15.8	5.96	66.9	0.000615	0.0094	3.21
3	185000000	185000000	91400	-	ENSG00000113790	EHHADH	NA	protein_coding	NA	EHHADH	-13.8	4.51	66.9	0.000615	0.0094	3.21
17	7380000	7390000	9240	+	ENSG00000174292	TNK1	NA	protein_coding	NA	TNK1	-13.8	4.42	66.9	0.000615	0.0094	3.21
1	101000000	101000000	19300	+	ENSG00000162692	VCAM1	NA	protein_coding	NA	VCAM1	-12.5	4.56	66.9	0.000617	0.00942	3.21
19	35200000	35300000	19600	+	ENSG00000105699	LSR	NA	protein_coding	NA	LSR	-13.1	4.58	66.8	0.000618	0.00942	3.21
9	40200000	40300000	43100	+	ENSG00000183148	ANKRD20A2	NA	protein_coding	NA	ANKRD20A2	-14.7	6.65	66.8	0.000618	0.00942	3.21
7	5930000	5970000	45100	-	ENSG00000155026	RSPH10B	NA	protein_coding	NA	RSPH10B	-11.9	4.71	66.8	0.000619	0.00942	3.21
17	30600000	30600000	9990	+	ENSG00000266733	TBC1D29P	NA	transcribed_unprocessed_pseudogene	NA	TBC1D29P	-14.4	5.14	66.8	0.000619	0.00942	3.21
1	18500000	18500000	5140	+	ENSG00000179023	KLHDC7A	NA	protein_coding	NA	KLHDC7A	-13.6	4.65	66.7	0.00062	0.00942	3.21
2	69000000	69200000	236000	+	ENSG00000169604	ANTXR1	NA	protein_coding	NA	ANTXR1	-11.7	5.16	46.5	0.000621	0.00942	3.21
19	56500000	56500000	22400	+	ENSG00000196263	ZNF471	NA	protein_coding	NA	ZNF471	-13.6	4.47	66.7	0.000621	0.00942	3.21
15	80100000	80100000	78800	+	ENSG00000086666	ZFAND6	NA	protein_coding	NA	ZFAND6	5.46	8.18	46.5	0.000622	0.00942	3.21
19	38900000	38900000	9190	+	ENSG00000104825	NFKBIB	NA	protein_coding	NA	NFKBIB	-14.6	5.55	66.6	0.000622	0.00942	3.21
12	80100000	80400000	281000	+	ENSG00000165899	OTOGL	NA	protein_coding	NA	OTOGL	-13.4	5.02	66.6	0.000622	0.00942	3.21
12	124000000	124000000	174000	+	ENSG00000197653	DNAH10	NA	protein_coding	NA	DNAH10	-14.1	5.37	66.6	0.000622	0.00942	3.21
17	15600000	15600000	54000	-	ENSG00000241322	CDRT1	NA	protein_coding	NA	CDRT1	-13.8	5.12	66.6	0.000622	0.00942	3.21
16	71600000	71600000	16000	+	ENSG00000140832	MARVELD3	NA	protein_coding	NA	MARVELD3	-11.2	4.9	46.5	0.000623	0.00943	3.21
1	16000000	16100000	13600	+	ENSG00000184908	CLCNKB	NA	protein_coding	NA	CLCNKB	-14.3	4.73	66.5	0.000624	0.00943	3.21
4	25600000	25700000	30700	+	ENSG00000157765	SLC34A2	NA	protein_coding	NA	SLC34A2	-13.1	4.65	66.4	0.000626	0.00944	3.2
3	38100000	38100000	4540	+	ENSG00000172936	MYD88	NA	protein_coding	NA	MYD88	-13.5	4.68	66.4	0.000626	0.00944	3.2
16	30100000	30100000	9400	-	ENSG00000102882	MAPK3	NA	protein_coding	NA	MAPK3	5.69	7.39	46.4	0.000627	0.00944	3.2
17	7000000	7010000	14700	+	ENSG00000108839	ALOX12	NA	protein_coding	NA	ALOX12	-14.1	5.2	66.4	0.000627	0.00944	3.2
12	71900000	72200000	248000	+	ENSG00000139287	TPH2	NA	protein_coding	NA	TPH2	-12.7	4.57	66.3	0.000627	0.00944	3.2
19	16700000	16800000	98000	+	ENSG00000188039	NWD1	NA	protein_coding	NA	NWD1	-13.1	4.69	66.3	0.000628	0.00944	3.2
1	52400000	52400000	31600	-	ENSG00000085840	ORC1	NA	protein_coding	NA	ORC1	-12.7	4.69	66.2	0.00063	0.00944	3.2
4	153000000	153000000	43300	+	ENSG00000137460	FHDC1	NA	protein_coding	NA	FHDC1	-13.7	4.95	66.2	0.000631	0.00944	3.2
3	108000000	109000000	149000	-	ENSG00000144821	MYH15	NA	protein_coding	NA	MYH15	-14.8	5.78	66.2	0.000631	0.00944	3.2
7	114000000	114000000	199000	-	ENSG00000154415	PPP1R3A	NA	protein_coding	NA	PPP1R3A	-13.2	4.78	66.1	0.000631	0.00944	3.2
2	238000000	238000000	14300	+	ENSG00000168427	KLHL30	NA	protein_coding	NA	KLHL30	-11.5	4.88	46.2	0.000631	0.00944	3.2
14	77500000	77600000	111000	-	ENSG00000100596	SPTLC2	NA	protein_coding	NA	SPTLC2	6.64	7.56	46.2	0.000632	0.00944	3.2
7	44600000	44700000	102000	+	ENSG00000105953	OGDH	NA	protein_coding	NA	OGDH	5.91	8.84	46.2	0.000632	0.00944	3.2
5	140000000	140000000	102000	+	ENSG00000131508	UBE2D2	NA	protein_coding	NA	UBE2D2	8.51	9.93	46.2	0.000633	0.00944	3.2
2	120000000	120000000	166000	+	ENSG00000115109	EPB41L5	NA	protein_coding	NA	EPB41L5	-12.3	4.63	65.9	0.000636	0.00944	3.2
9	131000000	132000000	127000	+	ENSG00000130723	PRRC2B	NA	protein_coding	NA	PRRC2B	4.59	9.46	46.1	0.000636	0.00944	3.2
15	102000000	102000000	8000	+	ENSG00000182854	OR4F15	NA	protein_coding	NA	OR4F15	-13	4.43	65.9	0.000636	0.00944	3.2
17	13000000	13000000	26500	-	ENSG00000006744	ELAC2	NA	protein_coding	NA	ELAC2	-13.2	4.58	65.9	0.000637	0.00944	3.2
8	144000000	144000000	16100	-	ENSG00000071894	CPSF1	NA	protein_coding	NA	CPSF1	-5.56	6.66	46.1	0.000637	0.00944	3.2
9	128000000	128000000	117000	+	ENSG00000136854	STXBP1	NA	protein_coding	NA	STXBP1	7.57	8.22	46.1	0.000638	0.00944	3.2
6	159000000	159000000	10700	-	ENSG00000164691	TAGAP	NA	protein_coding	NA	TAGAP	-13.6	4.98	65.8	0.000638	0.00944	3.19
9	98900000	99100000	128000	+	ENSG00000204291	COL15A1	NA	protein_coding	NA	COL15A1	-13.3	4.35	65.8	0.000638	0.00944	3.19
15	56900000	57300000	381000	+	ENSG00000140262	TCF12	NA	protein_coding	NA	TCF12	4.87	8.52	46	0.000639	0.00944	3.19
15	102000000	102000000	3380	+	ENSG00000184140	OR4F6	NA	protein_coding	NA	OR4F6	-13.6	4.43	65.8	0.000639	0.00944	3.19
3	112000000	112000000	46400	+	ENSG00000176040	TMPRSS7	NA	protein_coding	NA	TMPRSS7	-12.5	4.72	65.8	0.00064	0.00944	3.19
4	95200000	95500000	387000	-	ENSG00000182168	UNC5C	NA	protein_coding	NA	UNC5C	-13.3	5.21	65.8	0.00064	0.00944	3.19
10	19000000	19800000	742000	+	ENSG00000204740	MALRD1	NA	protein_coding	NA	MALRD1	-13.1	5.24	65.8	0.00064	0.00944	3.19
11	13400000	13500000	75300	-	ENSG00000148925	BTBD10	NA	protein_coding	NA	BTBD10	4.58	6.76	46	0.000642	0.00944	3.19
8	27800000	27800000	40700	+	ENSG00000171320	ESCO2	NA	protein_coding	NA	ESCO2	-13.5	4.65	65.7	0.000642	0.00944	3.19
16	57200000	57200000	54300	+	ENSG00000159579	RSPRY1	NA	protein_coding	NA	RSPRY1	5.3	6.85	45.9	0.000643	0.00944	3.19
8	139000000	139000000	326000	-	ENSG00000169436	COL22A1	NA	protein_coding	NA	COL22A1	-13.7	5.02	65.6	0.000643	0.00944	3.19
11	2160000	2170000	7950	-	ENSG00000180176	TH	NA	protein_coding	NA	TH	-14.1	4.61	65.6	0.000643	0.00944	3.19
8	124000000	124000000	268000	+	ENSG00000214814	FER1L6	NA	protein_coding	NA	FER1L6	-13.4	5.44	65.6	0.000643	0.00944	3.19
7	12600000	12700000	89600	+	ENSG00000006747	SCIN	NA	protein_coding	NA	SCIN	-12.8	4.68	45.9	0.000644	0.00944	3.19
3	119000000	119000000	246000	-	ENSG00000144847	IGSF11	NA	protein_coding	NA	IGSF11	-12.8	4.47	65.6	0.000644	0.00944	3.19
22	49800000	49800000	54200	-	ENSG00000100425	BRD1	NA	protein_coding	NA	BRD1	5.46	9.58	45.9	0.000645	0.00944	3.19
3	52300000	52300000	33600	-	ENSG00000164091	WDR82	NA	protein_coding	NA	WDR82	6.84	8.91	45.9	0.000645	0.00944	3.19
19	1910000	1930000	20600	+	ENSG00000227500	SCAMP4	NA	protein_coding	NA	SCAMP4	-12.2	4.41	45.9	0.000645	0.00944	3.19
12	55700000	55700000	4050	+	ENSG00000135441	BLOC1S1	NA	protein_coding	NA	BLOC1S1	6.32	7.07	45.8	0.000647	0.00944	3.19
19	38400000	38400000	17300	-	ENSG00000171777	RASGRP4	NA	protein_coding	NA	RASGRP4	-13.8	4.9	65.4	0.000647	0.00944	3.19
2	189000000	189000000	193000	-	ENSG00000204262	COL5A2	NA	protein_coding	NA	COL5A2	-13.4	5.93	65.4	0.000647	0.00944	3.19
15	74200000	74300000	134000	+	ENSG00000140481	CCDC33	NA	protein_coding	NA	CCDC33	-13.7	4.34	65.4	0.000648	0.00944	3.19
9	91200000	91400000	148000	-	ENSG00000148090	AUH	NA	protein_coding	NA	AUH	-13.2	4.46	65.3	0.000649	0.00944	3.19
20	50600000	50700000	105000	-	ENSG00000042062	RIPOR3	NA	protein_coding	NA	RIPOR3	-14.4	5.62	65.3	0.00065	0.00944	3.19
18	24200000	24400000	236000	-	ENSG00000141447	OSBPL1A	NA	protein_coding	NA	OSBPL1A	-13.6	4.87	65.3	0.00065	0.00944	3.19
10	133000000	133000000	14400	-	ENSG00000151651	ADAM8	NA	protein_coding	NA	ADAM8	-13.7	4.69	65.3	0.00065	0.00944	3.19
12	29400000	29500000	85200	-	ENSG00000187950	OVCH1	NA	protein_coding	NA	OVCH1	-13.2	4.57	65.3	0.00065	0.00944	3.19
15	41500000	41500000	27100	-	ENSG00000103932	RPAP1	NA	protein_coding	NA	RPAP1	-14.1	5.43	65.2	0.000651	0.00944	3.19
13	48100000	48100000	41800	-	ENSG00000136146	MED4	NA	protein_coding	NA	MED4	-13.5	4.72	65.2	0.000651	0.00944	3.19
11	64600000	64600000	11700	+	ENSG00000197891	SLC22A12	NA	protein_coding	NA	SLC22A12	-14	4.78	65.2	0.000651	0.00944	3.19
19	18400000	18400000	3780	-	ENSG00000105655	ISYNA1	NA	protein_coding	NA	ISYNA1	-14.2	4.76	65.1	0.000653	0.00944	3.19
X	5840000	6230000	388000	-	ENSG00000146938	NLGN4X	NA	protein_coding	NA	NLGN4X	-13.3	4.5	65.1	0.000653	0.00944	3.18
4	7430000	7430000	4650	-	ENSG00000178597	PSAPL1	NA	protein_coding	NA	PSAPL1	-13.6	4.45	65.1	0.000653	0.00944	3.18
22	17400000	17600000	198000	+	ENSG00000099954	CECR2	NA	protein_coding	NA	CECR2	-13.3	4.34	65.1	0.000654	0.00944	3.18
13	95400000	95600000	146000	+	ENSG00000134873	CLDN10	NA	protein_coding	NA	CLDN10	-12.8	4.54	65.1	0.000654	0.00944	3.18
21	34800000	36000000	1220000	-	ENSG00000159216	RUNX1	NA	protein_coding	NA	RUNX1	4.23	9.24	45.6	0.000654	0.00944	3.18
2	132000000	132000000	9430	+	ENSG00000018607	ZNF806	NA	unprocessed_pseudogene	NA	ZNF806	-12	4.75	65.1	0.000655	0.00944	3.18
2	206000000	207000000	178000	+	ENSG00000114948	ADAM23	NA	protein_coding	NA	ADAM23	-13.7	4.67	65	0.000655	0.00944	3.18
22	40900000	40900000	75700	+	ENSG00000196236	XPNPEP3	NA	protein_coding	NA	XPNPEP3	-14.1	4.55	65	0.000655	0.00944	3.18
17	28600000	28600000	21500	-	ENSG00000076382	SPAG5	NA	protein_coding	NA	SPAG5	-13.5	4.68	65	0.000656	0.00944	3.18
12	123000000	123000000	167000	-	ENSG00000090975	PITPNM2	NA	protein_coding	NA	PITPNM2	-7.41	5.9	45.6	0.000656	0.00944	3.18
12	118000000	118000000	29700	-	ENSG00000176871	WSB2	NA	protein_coding	NA	WSB2	-13.4	4.31	65	0.000656	0.00944	3.18
16	28500000	28500000	21500	-	ENSG00000188603	CLN3	NA	protein_coding	NA	CLN3	-13.9	4.31	65	0.000656	0.00944	3.18
2	238000000	238000000	80500	+	ENSG00000204104	TRAF3IP1	NA	protein_coding	NA	TRAF3IP1	-13.2	4.68	65	0.000656	0.00944	3.18
20	37100000	37200000	78400	-	ENSG00000101353	MROH8	NA	protein_coding	NA	MROH8	-12.7	4.77	64.9	0.000657	0.00944	3.18
6	56100000	56400000	338000	-	ENSG00000124749	COL21A1	NA	protein_coding	NA	COL21A1	-12.7	5.44	65	0.000657	0.00944	3.18
15	41800000	41800000	20100	+	ENSG00000168970	JMJD7-PLA2G4B	NA	protein_coding	NA	JMJD7-PLA2G4B	-14.5	5.34	65	0.000657	0.00944	3.18
2	71500000	71700000	233000	+	ENSG00000135636	DYSF	NA	protein_coding	NA	DYSF	-8.01	6.26	45.5	0.000658	0.00944	3.18
1	154000000	154000000	134000	-	ENSG00000143614	GATAD2B	NA	protein_coding	NA	GATAD2B	4.8	9.05	45.5	0.000658	0.00944	3.18
16	2750000	2770000	19900	+	ENSG00000167978	SRRM2	NA	protein_coding	NA	SRRM2	5.86	10.2	45.5	0.000658	0.00944	3.18
2	109000000	110000000	375000	+	ENSG00000172985	SH3RF3	NA	protein_coding	NA	SH3RF3	-14.4	5.06	64.8	0.00066	0.00944	3.18
X	54200000	54400000	166000	-	ENSG00000196632	WNK3	NA	protein_coding	NA	WNK3	-13.3	5.13	64.8	0.00066	0.00944	3.18
2	23400000	23700000	323000	+	ENSG00000119771	KLHL29	NA	protein_coding	NA	KLHL29	-11.5	4.58	45.4	0.000661	0.00944	3.18
12	43400000	43600000	198000	-	ENSG00000173157	ADAMTS20	NA	protein_coding	NA	ADAMTS20	-13.9	5	64.8	0.000661	0.00944	3.18
X	155000000	155000000	23800	+	ENSG00000269335	IKBKG	NA	protein_coding	NA	IKBKG	-13.9	4.87	64.8	0.000661	0.00944	3.18
X	45100000	45200000	52500	-	ENSG00000147113	DIPK2B	NA	protein_coding	NA	DIPK2B	-13.1	4.51	64.8	0.000662	0.00944	3.18
11	119000000	119000000	13900	+	ENSG00000160683	CXCR5	NA	protein_coding	NA	CXCR5	-13.2	5.02	64.7	0.000663	0.00944	3.18
1	155000000	155000000	7090	-	ENSG00000185499	MUC1	NA	protein_coding	NA	MUC1	-13	6.55	45.4	0.000663	0.00944	3.18
5	115000000	115000000	55800	-	ENSG00000152503	TRIM36	NA	protein_coding	NA	TRIM36	-14.2	5.16	64.7	0.000664	0.00944	3.18
1	179000000	180000000	189000	+	ENSG00000162779	AXDND1	NA	protein_coding	NA	AXDND1	-13.5	5.35	64.7	0.000664	0.00944	3.18
20	31800000	31800000	1300	-	ENSG00000179772	FOXS1	NA	protein_coding	NA	FOXS1	-14.1	4.77	64.6	0.000665	0.00944	3.18
16	23600000	23600000	38200	-	ENSG00000083093	PALB2	NA	protein_coding	NA	PALB2	-14.2	4.59	64.6	0.000666	0.00944	3.18
20	31800000	31800000	15400	+	ENSG00000101306	MYLK2	NA	protein_coding	NA	MYLK2	-14.4	5.38	64.5	0.000666	0.00944	3.18
16	24800000	24900000	65800	+	ENSG00000158865	SLC5A11	NA	protein_coding	NA	SLC5A11	-13.7	4.42	64.5	0.000666	0.00944	3.18
2	234000000	234000000	102000	+	ENSG00000144481	TRPM8	NA	protein_coding	NA	TRPM8	-13	4.76	64.5	0.000667	0.00944	3.18
2	73800000	73800000	33000	+	ENSG00000187833	C2orf78	NA	protein_coding	NA	C2orf78	-13	4.52	64.5	0.000667	0.00944	3.18
3	15400000	15400000	59300	-	ENSG00000206562	METTL6	NA	protein_coding	NA	METTL6	-11.7	4.63	64.5	0.000667	0.00944	3.18
3	126000000	126000000	95200	-	ENSG00000114544	SLC41A3	NA	protein_coding	NA	SLC41A3	-12.9	4.54	64.5	0.000668	0.00944	3.18
1	92100000	92200000	104000	+	ENSG00000189195	BTBD8	NA	protein_coding	NA	BTBD8	-13.1	4.7	64.5	0.000668	0.00944	3.18
6	36600000	36600000	11200	+	ENSG00000112081	SRSF3	NA	protein_coding	NA	SRSF3	4.41	9.7	45.2	0.000669	0.00944	3.17
22	39000000	39000000	10500	+	ENSG00000179750	APOBEC3B	NA	protein_coding	NA	APOBEC3B	-13.8	4.35	64.4	0.000669	0.00944	3.17
20	49000000	49100000	50700	+	ENSG00000124207	CSE1L	NA	protein_coding	NA	CSE1L	5.27	8.23	45.2	0.00067	0.00944	3.17
1	203000000	203000000	17700	-	ENSG00000159346	ADIPOR1	NA	protein_coding	NA	ADIPOR1	4.17	7.35	45.2	0.00067	0.00944	3.17
2	133000000	134000000	897000	-	ENSG00000176771	NCKAP5	NA	protein_coding	NA	NCKAP5	-14.6	5.42	64.4	0.00067	0.00944	3.17
2	94900000	94900000	5390	+	ENSG00000163060	TEKT4	NA	protein_coding	NA	TEKT4	-13	4.57	64.4	0.000671	0.00944	3.17
19	21700000	21800000	44800	-	ENSG00000197020	ZNF100	NA	protein_coding	NA	ZNF100	-12.5	4.99	64.4	0.000671	0.00944	3.17
10	112000000	112000000	65500	-	ENSG00000119927	GPAM	NA	protein_coding	NA	GPAM	-13	4.76	64.2	0.000673	0.00944	3.17
16	528000	555000	26900	+	ENSG00000103326	CAPN15	NA	protein_coding	NA	CAPN15	-5.57	5.76	45.1	0.000674	0.00944	3.17
19	37300000	37400000	56500	+	ENSG00000181666	ZNF875	NA	protein_coding	NA	ZNF875	-13.4	4.35	64.1	0.000676	0.00944	3.17
4	166000000	166000000	231000	+	ENSG00000038295	TLL1	NA	protein_coding	NA	TLL1	-13.1	4.73	64.1	0.000677	0.00944	3.17
5	141000000	141000000	5060	+	ENSG00000187372	PCDHB13	NA	protein_coding	NA	PCDHB13	-15.8	6.56	64.1	0.000677	0.00944	3.17
1	232000000	233000000	164000	-	ENSG00000116991	SIPA1L2	NA	protein_coding	NA	SIPA1L2	-14.9	6.08	64	0.000678	0.00944	3.17
16	67200000	67200000	18100	-	ENSG00000135723	FHOD1	NA	protein_coding	NA	FHOD1	-13.7	4.51	64	0.000678	0.00944	3.17
2	43800000	43800000	36000	+	ENSG00000138036	DYNC2LI1	NA	protein_coding	NA	DYNC2LI1	-12.7	4.89	64	0.000678	0.00944	3.17
6	169000000	169000000	38300	-	ENSG00000186340	THBS2	NA	protein_coding	NA	THBS2	-15.3	6.36	64	0.000678	0.00944	3.17
1	183000000	183000000	15600	-	ENSG00000135828	RNASEL	NA	protein_coding	NA	RNASEL	-13.2	5.18	64	0.000679	0.00944	3.17
17	7310000	7310000	5460	+	ENSG00000132507	EIF5A	NA	protein_coding	NA	EIF5A	8.1	13.1	44.9	0.000681	0.00944	3.17
1	35800000	35900000	49900	+	ENSG00000134698	AGO4	NA	protein_coding	NA	AGO4	6.58	6.64	44.9	0.000681	0.00944	3.17
2	149000000	149000000	143000	+	ENSG00000135999	EPC2	NA	protein_coding	NA	EPC2	4.02	8.7	44.9	0.000681	0.00944	3.17
5	177000000	177000000	18500	-	ENSG00000160883	HK3	NA	protein_coding	NA	HK3	4.43	7.1	44.9	0.000681	0.00944	3.17
12	9070000	9120000	48600	-	ENSG00000175899	A2M	NA	protein_coding	NA	A2M	-12.7	4.83	63.9	0.000681	0.00944	3.17
10	115000000	115000000	78100	+	ENSG00000151553	FAM160B1	NA	protein_coding	NA	FAM160B1	-12.4	4.53	63.8	0.000682	0.00944	3.17
4	75900000	75900000	42700	-	ENSG00000156194	PPEF2	NA	protein_coding	NA	PPEF2	-13.1	4.9	63.8	0.000683	0.00944	3.17
7	6500000	6550000	54000	-	ENSG00000215045	GRID2IP	NA	protein_coding	NA	GRID2IP	-14.1	4.98	63.8	0.000683	0.00944	3.17
10	100000000	100000000	20700	+	ENSG00000075290	WNT8B	NA	protein_coding	NA	WNT8B	-13.9	4.92	63.7	0.000685	0.00944	3.16
8	22400000	22500000	100000	+	ENSG00000120910	PPP3CC	NA	protein_coding	NA	PPP3CC	-12.4	4.59	63.8	0.000685	0.00944	3.16
17	16000000	16200000	189000	-	ENSG00000141027	NCOR1	NA	protein_coding	NA	NCOR1	4.13	9.84	44.8	0.000685	0.00944	3.16
2	242000000	242000000	42400	+	ENSG00000168395	ING5	NA	protein_coding	NA	ING5	-10.3	4.21	44.8	0.000685	0.00944	3.16
9	135000000	135000000	9820	+	ENSG00000196422	PPP1R26	NA	protein_coding	NA	PPP1R26	-14.8	5.64	63.7	0.000685	0.00944	3.16
X	50400000	50500000	105000	-	ENSG00000274588	DGKK	NA	protein_coding	NA	DGKK	-13.1	4.77	63.8	0.000685	0.00944	3.16
19	6370000	6380000	2460	+	ENSG00000125652	ALKBH7	NA	protein_coding	NA	ALKBH7	-14.3	5.05	63.7	0.000686	0.00944	3.16
19	44800000	44900000	43000	+	ENSG00000130202	NECTIN2	NA	protein_coding	NA	NECTIN2	-12.9	4.5	63.7	0.000686	0.00944	3.16
1	22700000	22900000	211000	+	ENSG00000133216	EPHB2	NA	protein_coding	NA	EPHB2	-14.4	5.45	63.7	0.000686	0.00944	3.16
17	8070000	8090000	15100	-	ENSG00000179477	ALOX12B	NA	protein_coding	NA	ALOX12B	-14.1	5.3	63.7	0.000686	0.00944	3.16
9	129000000	129000000	35900	+	ENSG00000136802	LRRC8A	NA	protein_coding	NA	LRRC8A	4.07	8.75	44.7	0.000687	0.00944	3.16
7	117000000	117000000	64900	-	ENSG00000154438	ASZ1	NA	protein_coding	NA	ASZ1	-12.6	4.43	63.6	0.000687	0.00944	3.16
1	38900000	38900000	56000	-	ENSG00000158315	RHBDL2	NA	protein_coding	NA	RHBDL2	-12.7	4.56	63.6	0.000687	0.00944	3.16
4	86600000	86800000	221000	+	ENSG00000163629	PTPN13	NA	protein_coding	NA	PTPN13	-13.7	5.3	63.6	0.000687	0.00944	3.16
10	132000000	132000000	149000	+	ENSG00000188385	JAKMIP3	NA	protein_coding	NA	JAKMIP3	-13.6	4.27	63.7	0.000687	0.00944	3.16
9	92300000	92300000	28300	-	ENSG00000198000	NOL8	NA	protein_coding	NA	NOL8	-12.3	4.61	63.6	0.000687	0.00944	3.16
4	152000000	153000000	216000	-	ENSG00000109670	FBXW7	NA	protein_coding	NA	FBXW7	4.8	7.64	44.7	0.000688	0.00944	3.16
1	162000000	162000000	40700	-	ENSG00000162745	OLFML2B	NA	protein_coding	NA	OLFML2B	-13.3	4.45	63.6	0.000688	0.00944	3.16
12	102000000	102000000	118000	+	ENSG00000196091	MYBPC1	NA	protein_coding	NA	MYBPC1	-13	5.05	63.6	0.000688	0.00944	3.16
14	35000000	35000000	47600	+	ENSG00000100883	SRP54	NA	protein_coding	NA	SRP54	7.82	6.53	44.7	0.000689	0.00944	3.16
6	46800000	46800000	46400	+	ENSG00000112818	MEP1A	NA	protein_coding	NA	MEP1A	-13.5	4.79	63.6	0.000689	0.00944	3.16
8	23000000	23100000	48900	-	ENSG00000120889	TNFRSF10B	NA	protein_coding	NA	TNFRSF10B	-14	4.71	63.6	0.000689	0.00944	3.16
16	30500000	30500000	50500	+	ENSG00000005844	ITGAL	NA	protein_coding	NA	ITGAL	-13.6	5	63.5	0.00069	0.00944	3.16
X	54900000	54900000	11000	+	ENSG00000067445	TRO	NA	protein_coding	NA	TRO	-13.5	4.52	63.5	0.00069	0.00944	3.16
19	617000	634000	16300	-	ENSG00000099821	POLRMT	NA	protein_coding	NA	POLRMT	-16.2	6.53	63.5	0.00069	0.00944	3.16
5	141000000	141000000	4830	+	ENSG00000120327	PCDHB14	NA	protein_coding	NA	PCDHB14	-15.9	6.43	63.5	0.00069	0.00944	3.16
3	46700000	46700000	5750	-	ENSG00000283706	PRSS50	NA	protein_coding	NA	PRSS50	-13.1	4.53	63.5	0.000692	0.00944	3.16
1	26500000	26500000	4200	+	ENSG00000198830	HMGN2	NA	protein_coding	NA	HMGN2	4.26	7.68	44.6	0.000693	0.00944	3.16
12	56400000	56400000	33100	-	ENSG00000111602	TIMELESS	NA	protein_coding	NA	TIMELESS	-14.1	4.24	63.4	0.000694	0.00944	3.16
22	27700000	27800000	53500	-	ENSG00000169184	MN1	NA	protein_coding	NA	MN1	-12.6	6.22	44.5	0.000695	0.00944	3.16
2	135000000	135000000	41100	+	ENSG00000082258	CCNT2	NA	protein_coding	NA	CCNT2	5.07	7.48	44.5	0.000696	0.00944	3.16
1	45600000	45600000	4010	-	ENSG00000159588	CCDC17	NA	protein_coding	NA	CCDC17	-15	5.23	63.3	0.000696	0.00944	3.16
9	6530000	6650000	113000	-	ENSG00000178445	GLDC	NA	protein_coding	NA	GLDC	-13.2	4.6	63.3	0.000696	0.00944	3.16
17	8250000	8270000	22900	+	ENSG00000178921	PFAS	NA	protein_coding	NA	PFAS	-14.3	4.82	63.3	0.000696	0.00944	3.16
1	238000000	238000000	1550	-	ENSG00000270188	MTRNR2L11	NA	protein_coding	NA	MTRNR2L11	15.4	6.03	113	0.000696	0.00944	3.16
15	78600000	78700000	104000	-	ENSG00000117971	CHRNB4	NA	protein_coding	NA	CHRNB4	-14	4.71	63.2	0.000697	0.00944	3.16
16	48200000	48200000	80700	-	ENSG00000121270	ABCC11	NA	protein_coding	NA	ABCC11	-13.3	4.62	63.2	0.000697	0.00944	3.16
2	98100000	98300000	226000	+	ENSG00000168658	VWA3B	NA	protein_coding	NA	VWA3B	-14.1	5.78	63.2	0.000697	0.00944	3.16
1	210000000	210000000	37600	-	ENSG00000196878	LAMB3	NA	protein_coding	NA	LAMB3	-14.5	5.22	63.2	0.000697	0.00944	3.16
15	68200000	68300000	50200	-	ENSG00000128973	CLN6	NA	protein_coding	NA	CLN6	5.92	6.05	44.5	0.000698	0.00944	3.16
13	111000000	111000000	72200	-	ENSG00000134905	CARS2	NA	protein_coding	NA	CARS2	-13.5	5.06	63.2	0.000698	0.00944	3.16
5	149000000	149000000	3440	+	ENSG00000169252	ADRB2	NA	protein_coding	NA	ADRB2	-13	4.35	63.2	0.000698	0.00944	3.16
19	43900000	43900000	22700	-	ENSG00000124459	ZNF45	NA	protein_coding	NA	ZNF45	-12.9	5.04	63.2	0.000699	0.00944	3.16
9	130000000	130000000	8120	+	ENSG00000136816	TOR1B	NA	protein_coding	NA	TOR1B	-13.7	4.43	63.1	0.000699	0.00944	3.16
15	91000000	91000000	8260	+	ENSG00000166965	RCCD1	NA	protein_coding	NA	RCCD1	-13.4	4.54	63.2	0.000699	0.00944	3.16
15	83000000	83000000	23200	-	ENSG00000169609	C15orf40	NA	protein_coding	NA	C15orf40	-15.1	5.38	44.4	0.000699	0.00944	3.16
11	108000000	108000000	30900	+	ENSG00000075239	ACAT1	NA	protein_coding	NA	ACAT1	5.65	8.57	44.4	0.0007	0.00944	3.16
4	89900000	90000000	75100	+	ENSG00000138722	MMRN1	NA	protein_coding	NA	MMRN1	-13.2	5.01	63.1	0.0007	0.00944	3.15
1	244000000	245000000	187000	+	ENSG00000179397	CATSPERE	NA	protein_coding	NA	CATSPERE	-12.9	4.52	63.1	0.0007	0.00944	3.15
1	18900000	18900000	31300	-	ENSG00000159423	ALDH4A1	NA	protein_coding	NA	ALDH4A1	-14	4.29	63.1	0.000701	0.00944	3.15
1	43200000	43300000	107000	-	ENSG00000117395	EBNA1BP2	NA	protein_coding	NA	EBNA1BP2	-13.3	4.53	63	0.000702	0.00944	3.15
1	3810000	3860000	45100	-	ENSG00000116198	CEP104	NA	protein_coding	NA	CEP104	-13.1	4.69	63	0.000703	0.00944	3.15
16	70200000	70200000	14000	+	ENSG00000157335	CLEC18C	NA	protein_coding	NA	CLEC18C	-14.8	5.7	62.9	0.000704	0.00944	3.15
6	69700000	69900000	194000	-	ENSG00000168216	LMBRD1	NA	protein_coding	NA	LMBRD1	-11.9	4.62	62.9	0.000704	0.00944	3.15
15	30100000	30100000	10400	+	ENSG00000179938	GOLGA8J	NA	protein_coding	NA	GOLGA8J	-9.42	4.26	44.3	0.000704	0.00944	3.15
1	223000000	223000000	33800	-	ENSG00000187554	TLR5	NA	protein_coding	NA	TLR5	-12.5	5.06	62.9	0.000705	0.00944	3.15
5	40800000	40900000	18900	+	ENSG00000132357	CARD6	NA	protein_coding	NA	CARD6	-13	4.4	62.9	0.000706	0.00944	3.15
X	48800000	48800000	23600	+	ENSG00000094631	HDAC6	NA	protein_coding	NA	HDAC6	-13.5	4.71	62.8	0.000707	0.00944	3.15
17	75600000	75700000	40300	-	ENSG00000108469	RECQL5	NA	protein_coding	NA	RECQL5	-13.8	5.11	62.8	0.000707	0.00944	3.15
6	39300000	39300000	8270	-	ENSG00000095981	KCNK16	NA	protein_coding	NA	KCNK16	-13.5	4.72	62.8	0.000708	0.00944	3.15
16	55700000	55700000	50600	+	ENSG00000103546	SLC6A2	NA	protein_coding	NA	SLC6A2	-12.8	4.46	62.8	0.000708	0.00944	3.15
2	130000000	130000000	31400	-	ENSG00000136699	SMPD4	NA	protein_coding	NA	SMPD4	-15.9	5.86	62.8	0.000709	0.00944	3.15
22	15700000	15700000	1120	+	ENSG00000241838	AP000529.1	NA	processed_pseudogene	NA	AP000529.1	9.57	10.8	44.2	0.000709	0.00944	3.15
5	139000000	139000000	38000	+	ENSG00000015479	MATR3	NA	protein_coding	NA	MATR3	6.77	10.8	44.2	0.00071	0.00944	3.15
17	64500000	64500000	9950	-	ENSG00000108654	DDX5	NA	protein_coding	NA	DDX5	8.24	13	44.2	0.00071	0.00944	3.15
X	106000000	106000000	136000	+	ENSG00000123572	NRK	NA	protein_coding	NA	NRK	-12.6	4.66	62.7	0.00071	0.00944	3.15
7	81900000	82400000	497000	-	ENSG00000153956	CACNA2D1	NA	protein_coding	NA	CACNA2D1	-13.4	4.66	62.7	0.00071	0.00944	3.15
1	228000000	228000000	8930	-	ENSG00000162931	TRIM17	NA	protein_coding	NA	TRIM17	-13.3	4.33	62.7	0.00071	0.00944	3.15
12	52500000	52500000	6080	-	ENSG00000205420	KRT6A	NA	protein_coding	NA	KRT6A	-13.6	4.45	62.7	0.00071	0.00944	3.15
7	140000000	140000000	243000	+	ENSG00000059377	TBXAS1	NA	protein_coding	NA	TBXAS1	-13.8	4.48	62.6	0.000711	0.00944	3.15
11	119000000	119000000	14300	+	ENSG00000160695	VPS11	NA	protein_coding	NA	VPS11	4.86	9.78	44.1	0.000711	0.00944	3.15
2	132000000	132000000	5990	+	ENSG00000163040	CCDC74A	NA	protein_coding	NA	CCDC74A	-14	4.87	62.7	0.000711	0.00944	3.15
6	39300000	39700000	395000	-	ENSG00000164627	KIF6	NA	protein_coding	NA	KIF6	-14.2	5.4	62.7	0.000711	0.00944	3.15
X	15500000	15600000	92300	+	ENSG00000102010	BMX	NA	protein_coding	NA	BMX	-12.9	4.86	62.6	0.000712	0.00944	3.15
19	32800000	32900000	39300	-	ENSG00000021488	SLC7A9	NA	protein_coding	NA	SLC7A9	-13.2	4.3	62.6	0.000713	0.00944	3.15
8	38700000	38900000	125000	+	ENSG00000147526	TACC1	NA	protein_coding	NA	TACC1	-14.6	5.88	62.6	0.000713	0.00944	3.15
7	25100000	25200000	45700	-	ENSG00000153790	C7orf31	NA	protein_coding	NA	C7orf31	-12.9	4.92	62.6	0.000713	0.00944	3.15
22	20400000	20400000	40200	-	ENSG00000161133	USP41	NA	protein_coding	NA	USP41	-13.2	4.97	62.6	0.000713	0.00944	3.15
1	170000000	170000000	192000	+	ENSG00000000460	C1orf112	NA	protein_coding	NA	C1orf112	-13.3	4.65	62.5	0.000714	0.00944	3.15
KI270711.1	4610	29600	25000	-	ENSG00000271254	AC240274.1	NA	protein_coding	NA	AC240274.1	-13.1	5.46	62.5	0.000714	0.00944	3.15
2	158000000	158000000	102000	-	ENSG00000123612	ACVR1C	NA	protein_coding	NA	ACVR1C	-12.9	5.06	62.5	0.000716	0.00944	3.15
19	12000000	12000000	21000	-	ENSG00000197647	ZNF433	NA	protein_coding	NA	ZNF433	-11.8	4.5	44	0.000716	0.00944	3.14
12	68300000	68300000	59900	-	ENSG00000111554	MDM1	NA	protein_coding	NA	MDM1	-12.2	4.79	62.4	0.000717	0.00944	3.14
21	42900000	42900000	33700	+	ENSG00000160194	NDUFV3	NA	protein_coding	NA	NDUFV3	-10.7	4.78	44	0.000717	0.00944	3.14
19	50800000	50800000	4800	+	ENSG00000142513	ACP4	NA	protein_coding	NA	ACP4	-13.4	4.33	62.4	0.000718	0.00944	3.14
5	41000000	41100000	73300	-	ENSG00000171495	MROH2B	NA	protein_coding	NA	MROH2B	-13.6	4.65	62.4	0.000718	0.00944	3.14
11	71500000	71500000	71000	+	ENSG00000172890	NADSYN1	NA	protein_coding	NA	NADSYN1	-14	4.63	62.4	0.000718	0.00944	3.14
2	205000000	206000000	1070000	+	ENSG00000116117	PARD3B	NA	protein_coding	NA	PARD3B	-12.7	4.58	62.4	0.000719	0.00944	3.14
7	126000000	127000000	815000	-	ENSG00000179603	GRM8	NA	protein_coding	NA	GRM8	-13.1	4.36	62.3	0.000719	0.00944	3.14
19	39300000	39300000	1580	+	ENSG00000183709	IFNL2	NA	protein_coding	NA	IFNL2	-13.5	4.78	62.3	0.000719	0.00944	3.14
3	98600000	98600000	14200	-	ENSG00000080819	CPOX	NA	protein_coding	NA	CPOX	-14	4.85	62.3	0.00072	0.00944	3.14
8	41600000	41600000	47800	+	ENSG00000158669	GPAT4	NA	protein_coding	NA	GPAT4	-12.6	4.47	62.3	0.000721	0.00944	3.14
20	38600000	38700000	49100	+	ENSG00000124143	ARHGAP40	NA	protein_coding	NA	ARHGAP40	-13.3	4.43	62.2	0.000723	0.00944	3.14
12	57000000	57100000	22700	-	ENSG00000166866	MYO1A	NA	protein_coding	NA	MYO1A	-13.5	4.92	62.2	0.000723	0.00944	3.14
17	82100000	82100000	20000	-	ENSG00000169710	FASN	NA	protein_coding	NA	FASN	-7.07	6.95	43.9	0.000723	0.00944	3.14
4	75500000	75600000	36500	+	ENSG00000174796	THAP6	NA	protein_coding	NA	THAP6	-12.7	4.61	62.2	0.000723	0.00944	3.14
5	80100000	80300000	144000	-	ENSG00000164300	SERINC5	NA	protein_coding	NA	SERINC5	-13.8	4.97	62.1	0.000724	0.00944	3.14
4	128000000	128000000	103000	+	ENSG00000164066	INTU	NA	protein_coding	NA	INTU	-11.3	4.03	43.8	0.000725	0.00944	3.14
16	23800000	23800000	3910	+	ENSG00000166869	CHP2	NA	protein_coding	NA	CHP2	-12.8	4.46	62.1	0.000725	0.00944	3.14
5	141000000	142000000	100000	+	ENSG00000253846	PCDHGA10	NA	protein_coding	NA	PCDHGA10	-13.5	4.37	62.1	0.000725	0.00944	3.14
8	71200000	71600000	395000	-	ENSG00000104313	EYA1	NA	protein_coding	NA	EYA1	-13.2	4.56	62.1	0.000726	0.00944	3.14
12	56200000	56200000	27200	-	ENSG00000139613	SMARCC2	NA	protein_coding	NA	SMARCC2	5.71	9.38	43.8	0.000726	0.00944	3.14
11	101000000	101000000	307000	+	ENSG00000165895	ARHGAP42	NA	protein_coding	NA	ARHGAP42	-13.1	4.34	62.1	0.000726	0.00944	3.14
16	23700000	23700000	22900	-	ENSG00000134398	ERN2	NA	protein_coding	NA	ERN2	-14.4	5.41	62	0.000727	0.00944	3.14
21	32600000	32600000	20500	-	ENSG00000159079	CFAP298	NA	protein_coding	NA	CFAP298	-14.1	4.19	62	0.000727	0.00944	3.14
10	50000000	50000000	28300	+	ENSG00000204149	AGAP6	NA	protein_coding	NA	AGAP6	-15.8	6.8	62	0.000727	0.00944	3.14
6	27200000	27300000	8920	+	ENSG00000112812	PRSS16	NA	protein_coding	NA	PRSS16	-13.4	4.36	62	0.000728	0.00944	3.14
2	17800000	17800000	35100	+	ENSG00000178295	GEN1	NA	protein_coding	NA	GEN1	-12.9	4.65	62	0.000728	0.00944	3.14
12	56100000	56100000	7960	+	ENSG00000257411	AC034102.2	NA	protein_coding	NA	AC034102.2	15.2	5.83	110	0.000728	0.00944	3.14
1	6210000	6220000	15800	+	ENSG00000158286	RNF207	NA	protein_coding	NA	RNF207	-13.6	4.6	62	0.000729	0.00944	3.14
7	128000000	128000000	440000	+	ENSG00000197157	SND1	NA	protein_coding	NA	SND1	4.41	8.98	43.7	0.000729	0.00944	3.14
7	73300000	73300000	7660	+	ENSG00000205578	POM121B	NA	unprocessed_pseudogene	NA	POM121B	-14.7	5.73	62	0.000729	0.00944	3.14
6	159000000	159000000	27300	-	ENSG00000130363	RSPH3	NA	protein_coding	NA	RSPH3	-14.1	5.12	61.9	0.00073	0.00945	3.14
17	81900000	81900000	7590	-	ENSG00000185105	MYADML2	NA	protein_coding	NA	MYADML2	-13.7	4.33	61.9	0.00073	0.00945	3.14
14	102000000	102000000	85300	+	ENSG00000140153	WDR20	NA	protein_coding	NA	WDR20	5.52	8.75	43.7	0.000731	0.00945	3.14
10	69200000	69300000	47200	+	ENSG00000156510	HKDC1	NA	protein_coding	NA	HKDC1	-13	4.53	61.9	0.000731	0.00945	3.14
3	96800000	97800000	938000	+	ENSG00000080224	EPHA6	NA	protein_coding	NA	EPHA6	-13.4	5.43	61.8	0.000732	0.00945	3.14
21	42100000	42100000	80500	+	ENSG00000177398	UMODL1	NA	protein_coding	NA	UMODL1	-13.4	5.6	61.8	0.000732	0.00945	3.14
2	234000000	234000000	91400	+	ENSG00000244122	UGT1A7	NA	protein_coding	NA	UGT1A7	-8.59	5.47	43.6	0.000732	0.00945	3.14
13	87700000	87700000	23700	+	ENSG00000165300	SLITRK5	NA	protein_coding	NA	SLITRK5	-11.2	5.71	43.6	0.000733	0.00945	3.13
16	71800000	71900000	39300	+	ENSG00000224470	ATXN1L	NA	protein_coding	NA	ATXN1L	4.6	7.85	43.6	0.000734	0.00945	3.13
4	85500000	86000000	528000	+	ENSG00000138639	ARHGAP24	NA	protein_coding	NA	ARHGAP24	-12.9	4.97	61.7	0.000735	0.00945	3.13
19	35000000	35000000	7880	-	ENSG00000180884	ZNF792	NA	protein_coding	NA	ZNF792	-13.5	4.45	61.7	0.000735	0.00945	3.13
1	24400000	24500000	57200	+	ENSG00000001461	NIPAL3	NA	protein_coding	NA	NIPAL3	-13.4	4.66	61.7	0.000736	0.00945	3.13
7	6160000	6270000	111000	-	ENSG00000008256	CYTH3	NA	protein_coding	NA	CYTH3	-12.7	4.46	61.7	0.000736	0.00945	3.13
8	37800000	37800000	60700	+	ENSG00000020181	ADGRA2	NA	protein_coding	NA	ADGRA2	-16.3	5.59	61.7	0.000736	0.00945	3.13
13	113000000	113000000	205000	+	ENSG00000126217	MCF2L	NA	protein_coding	NA	MCF2L	-15.6	6.74	61.7	0.000736	0.00945	3.13
11	26200000	26700000	474000	+	ENSG00000134343	ANO3	NA	protein_coding	NA	ANO3	-12.3	4.59	61.7	0.000736	0.00945	3.13
4	16000000	16100000	121000	-	ENSG00000007062	PROM1	NA	protein_coding	NA	PROM1	-12	4.65	61.6	0.000738	0.00946	3.13
19	55100000	55100000	15900	+	ENSG00000131037	EPS8L1	NA	protein_coding	NA	EPS8L1	-14.6	5.22	61.6	0.000739	0.00946	3.13
11	6470000	6480000	6800	-	ENSG00000132254	ARFIP2	NA	protein_coding	NA	ARFIP2	5.96	8.74	61.6	0.000739	0.00946	3.13
16	28500000	28500000	14800	-	ENSG00000233232	NPIPB7	NA	protein_coding	NA	NPIPB7	-13.6	4.29	61.6	0.00074	0.00946	3.13
14	55100000	55200000	43500	-	ENSG00000126787	DLGAP5	NA	protein_coding	NA	DLGAP5	-11.7	4.91	61.5	0.000741	0.00946	3.13
15	42100000	42200000	17600	-	ENSG00000168907	PLA2G4F	NA	protein_coding	NA	PLA2G4F	-13.5	4.56	61.5	0.000741	0.00946	3.13
1	234000000	234000000	420000	+	ENSG00000183780	SLC35F3	NA	protein_coding	NA	SLC35F3	-13.7	4.4	61.5	0.000741	0.00946	3.13
22	39400000	39400000	37300	+	ENSG00000100324	TAB1	NA	protein_coding	NA	TAB1	-14	5.02	61.5	0.000742	0.00946	3.13
17	76300000	76300000	34000	-	ENSG00000129646	QRICH2	NA	protein_coding	NA	QRICH2	-14.1	5.25	61.4	0.000743	0.00946	3.13
3	130000000	130000000	139000	+	ENSG00000172752	COL6A5	NA	protein_coding	NA	COL6A5	-13.7	5.37	61.4	0.000743	0.00946	3.13
9	87900000	87900000	6030	+	ENSG00000177992	SPATA31E1	NA	protein_coding	NA	SPATA31E1	-12.9	4.34	61.4	0.000743	0.00946	3.13
19	57900000	57900000	13500	-	ENSG00000196724	ZNF418	NA	protein_coding	NA	ZNF418	-11.6	4.63	43.4	0.000743	0.00946	3.13
19	55200000	55200000	9090	-	ENSG00000129990	SYT5	NA	protein_coding	NA	SYT5	-7.64	4.35	43.4	0.000744	0.00946	3.13
12	122000000	122000000	68600	+	ENSG00000175727	MLXIP	NA	protein_coding	NA	MLXIP	-10.2	3.77	43.4	0.000744	0.00946	3.13
2	135000000	135000000	83000	-	ENSG00000176601	MAP3K19	NA	protein_coding	NA	MAP3K19	-13.4	5	61.4	0.000744	0.00946	3.13
22	23800000	23800000	4630	-	ENSG00000099958	DERL3	NA	protein_coding	NA	DERL3	-13.4	4.25	61.3	0.000745	0.00947	3.13
22	50600000	50600000	5420	-	ENSG00000100299	ARSA	NA	protein_coding	NA	ARSA	-8.27	5.12	43.3	0.000746	0.00947	3.13
22	50600000	50600000	13200	+	ENSG00000008735	MAPK8IP2	NA	protein_coding	NA	MAPK8IP2	-11.4	4.82	43.3	0.000747	0.00947	3.13
13	52500000	52500000	21200	+	ENSG00000136108	CKAP2	NA	protein_coding	NA	CKAP2	-13.1	4.55	61.3	0.000747	0.00947	3.13
6	160000000	160000000	30700	+	ENSG00000146457	WTAP	NA	protein_coding	NA	WTAP	4.79	10.5	43.3	0.000748	0.00947	3.13
7	76400000	76400000	20400	-	ENSG00000146700	SSC4D	NA	protein_coding	NA	SSC4D	-14.3	5.48	61.2	0.000748	0.00947	3.13
15	82800000	82800000	50700	-	ENSG00000186628	FSD2	NA	protein_coding	NA	FSD2	-13.2	4.39	61.2	0.000749	0.00948	3.13
1	150000000	150000000	99400	+	ENSG00000277147	LINC00869	NA	transcribed_unprocessed_pseudogene	NA	LINC00869	-14.3	4.82	61.2	0.00075	0.00948	3.13
12	68800000	68900000	42500	+	ENSG00000135679	MDM2	NA	protein_coding	NA	MDM2	-11.3	4.24	43.2	0.000751	0.00949	3.12
6	167000000	167000000	44800	+	ENSG00000112494	UNC93A	NA	protein_coding	NA	UNC93A	-13.3	5.08	61.1	0.000752	0.00949	3.12
5	96500000	96800000	254000	+	ENSG00000153113	CAST	NA	protein_coding	NA	CAST	-12.4	4.53	61.1	0.000752	0.00949	3.12
3	184000000	184000000	9400	+	ENSG00000161203	AP2M1	NA	protein_coding	NA	AP2M1	4.61	8.41	43.2	0.000752	0.00949	3.12
3	132000000	132000000	50900	+	ENSG00000014257	ACPP	NA	protein_coding	NA	ACPP	-12.7	5.31	61.1	0.000753	0.00949	3.12
19	33100000	33100000	49600	+	ENSG00000076650	GPATCH1	NA	protein_coding	NA	GPATCH1	-13.1	4.76	61	0.000755	0.0095	3.12
1	12800000	12800000	5230	+	ENSG00000116721	PRAMEF1	NA	protein_coding	NA	PRAMEF1	-13	4.79	61	0.000755	0.00951	3.12
5	38300000	38500000	207000	+	ENSG00000164318	EGFLAM	NA	protein_coding	NA	EGFLAM	-13.6	4.7	61	0.000755	0.0095	3.12
8	86300000	86500000	136000	+	ENSG00000123124	WWP1	NA	protein_coding	NA	WWP1	4.52	8.54	43.1	0.000756	0.00951	3.12
15	34300000	34300000	1460	-	ENSG00000182117	NOP10	NA	protein_coding	NA	NOP10	6.87	7.83	43.1	0.000757	0.00951	3.12
18	31600000	31700000	63600	-	ENSG00000118276	B4GALT6	NA	protein_coding	NA	B4GALT6	-12.7	4.33	60.8	0.000759	0.00953	3.12
4	626000	671000	45200	+	ENSG00000133256	PDE6B	NA	protein_coding	NA	PDE6B	-14.3	4.77	60.8	0.000759	0.00953	3.12
12	41200000	41600000	386000	+	ENSG00000165966	PDZRN4	NA	protein_coding	NA	PDZRN4	-12.6	4.34	60.8	0.00076	0.00953	3.12
8	24300000	24400000	64900	+	ENSG00000042980	ADAM28	NA	protein_coding	NA	ADAM28	-10.7	4.78	43	0.000761	0.00954	3.12
2	219000000	219000000	29300	+	ENSG00000115556	PLCD4	NA	protein_coding	NA	PLCD4	-14.1	4.84	60.8	0.000761	0.00954	3.12
2	108000000	109000000	60900	+	ENSG00000135968	GCC2	NA	protein_coding	NA	GCC2	-13.4	5.14	60.7	0.000763	0.00954	3.12
19	11200000	11300000	63200	-	ENSG00000130158	DOCK6	NA	protein_coding	NA	DOCK6	-4.68	7.04	42.9	0.000764	0.00954	3.12
5	36200000	36200000	32300	+	ENSG00000145604	SKP2	NA	protein_coding	NA	SKP2	-13.3	4.21	60.6	0.000764	0.00954	3.12
7	103000000	103000000	25100	+	ENSG00000161057	PSMC2	NA	protein_coding	NA	PSMC2	-13	4.52	60.7	0.000764	0.00954	3.12
8	22100000	22200000	10300	-	ENSG00000168481	LGI3	NA	protein_coding	NA	LGI3	-13.5	4.59	60.6	0.000764	0.00954	3.12
1	115000000	115000000	22500	-	ENSG00000116748	AMPD1	NA	protein_coding	NA	AMPD1	-13.2	4.55	60.6	0.000765	0.00954	3.12
14	63400000	63500000	172000	-	ENSG00000154001	PPP2R5E	NA	protein_coding	NA	PPP2R5E	5.86	9.68	42.9	0.000765	0.00954	3.12
3	44900000	44900000	40400	+	ENSG00000163810	TGM4	NA	protein_coding	NA	TGM4	-12.8	4.39	60.6	0.000765	0.00954	3.12
5	127000000	127000000	60400	+	ENSG00000113368	LMNB1	NA	protein_coding	NA	LMNB1	5.52	6.2	42.9	0.000766	0.00954	3.12
3	39800000	40300000	451000	+	ENSG00000170011	MYRIP	NA	protein_coding	NA	MYRIP	-13.1	5.27	60.5	0.000767	0.00955	3.12
7	102000000	102000000	10700	-	ENSG00000260097	SPDYE6	NA	protein_coding	NA	SPDYE6	-12.7	5.52	60.5	0.000767	0.00955	3.11
1	206000000	206000000	22100	-	ENSG00000162877	PM20D1	NA	protein_coding	NA	PM20D1	-13.5	4.74	60.5	0.000768	0.00955	3.11
8	144000000	144000000	114000	+	ENSG00000179832	MROH1	NA	protein_coding	NA	MROH1	-12.6	4.36	60.5	0.000768	0.00955	3.11
5	127000000	127000000	175000	+	ENSG00000145794	MEGF10	NA	protein_coding	NA	MEGF10	-13.5	4.43	60.5	0.000769	0.00955	3.11
21	43400000	43400000	12600	-	ENSG00000142178	SIK1	NA	protein_coding	NA	SIK1	-13	3.85	42.8	0.00077	0.00955	3.11
20	24000000	24000000	3730	-	ENSG00000149435	GGTLC1	NA	protein_coding	NA	GGTLC1	-13.7	4.39	60.3	0.000772	0.00955	3.11
17	22100000	22200000	114000	+	ENSG00000263563	UBBP4	NA	transcribed_unprocessed_pseudogene	NA	UBBP4	5.71	8.16	60.3	0.000772	0.00955	3.11
6	35300000	35300000	24000	+	ENSG00000023892	DEF6	NA	protein_coding	NA	DEF6	-6.41	7.38	42.7	0.000773	0.00955	3.11
1	180000000	180000000	43000	+	ENSG00000143337	TOR1AIP1	NA	protein_coding	NA	TOR1AIP1	-13.7	4.5	42.7	0.000773	0.00955	3.11
21	38400000	38700000	282000	-	ENSG00000157554	ERG	NA	protein_coding	NA	ERG	-13.1	5.37	60.3	0.000773	0.00955	3.11
2	31900000	32000000	146000	-	ENSG00000162959	MEMO1	NA	protein_coding	NA	MEMO1	5.57	9.07	42.7	0.000773	0.00955	3.11
19	57700000	57700000	35300	+	ENSG00000204519	ZNF551	NA	protein_coding	NA	ZNF551	-12.7	4.49	60.3	0.000773	0.00955	3.11
2	112000000	112000000	49800	+	ENSG00000144152	FBLN7	NA	protein_coding	NA	FBLN7	-13.9	4.86	60.3	0.000774	0.00955	3.11
X	70900000	70900000	5550	-	ENSG00000165349	SLC7A3	NA	protein_coding	NA	SLC7A3	-13.2	4.42	60.3	0.000774	0.00955	3.11
19	40000000	40000000	36900	+	ENSG00000187187	ZNF546	NA	protein_coding	NA	ZNF546	-12.4	4.81	60.3	0.000774	0.00955	3.11
9	77200000	77400000	244000	+	ENSG00000197969	VPS13A	NA	protein_coding	NA	VPS13A	-5.4	6.35	42.7	0.000774	0.00955	3.11
17	40100000	40100000	7800	-	ENSG00000126368	NR1D1	NA	protein_coding	NA	NR1D1	5.01	8.07	42.7	0.000775	0.00955	3.11
5	61300000	61500000	214000	+	ENSG00000130449	ZSWIM6	NA	protein_coding	NA	ZSWIM6	4.46	8.05	42.7	0.000775	0.00955	3.11
19	21100000	21200000	54000	+	ENSG00000196705	ZNF431	NA	protein_coding	NA	ZNF431	-13.3	4.59	60.2	0.000776	0.00955	3.11
20	35600000	35700000	16000	-	ENSG00000244462	RBM12	NA	protein_coding	NA	RBM12	6.63	9.22	42.6	0.000776	0.00955	3.11
9	15500000	15500000	46900	-	ENSG00000164985	PSIP1	NA	protein_coding	NA	PSIP1	6.38	8.01	42.6	0.000777	0.00955	3.11
20	363000	398000	34700	+	ENSG00000101255	TRIB3	NA	protein_coding	NA	TRIB3	-13.2	4.73	60.1	0.000778	0.00955	3.11
16	72100000	72200000	64700	-	ENSG00000118557	PMFBP1	NA	protein_coding	NA	PMFBP1	-12.8	4.56	60.1	0.000779	0.00955	3.11
17	75700000	75800000	36500	+	ENSG00000132470	ITGB4	NA	protein_coding	NA	ITGB4	-14.3	5.68	42.6	0.00078	0.00955	3.11
15	74200000	74200000	32800	-	ENSG00000137868	STRA6	NA	protein_coding	NA	STRA6	-14.1	5.12	60.1	0.00078	0.00955	3.11
3	44500000	44500000	15800	-	ENSG00000178917	ZNF852	NA	protein_coding	NA	ZNF852	-11.5	4.87	60.1	0.00078	0.00955	3.11
X	20000000	20100000	110000	-	ENSG00000184368	MAP7D2	NA	protein_coding	NA	MAP7D2	-13.3	4.45	60	0.000781	0.00955	3.11
10	103000000	103000000	7460	-	ENSG00000213061	PFN1P11	NA	processed_pseudogene	NA	PFN1P11	15.3	5.93	106	0.000781	0.00955	3.11
1	161000000	161000000	32200	+	ENSG00000122224	LY9	NA	protein_coding	NA	LY9	-13.9	4.78	60	0.000782	0.00955	3.11
20	5910000	5930000	13800	+	ENSG00000089199	CHGB	NA	protein_coding	NA	CHGB	-13.5	4.18	60	0.000783	0.00955	3.11
16	67800000	67800000	25400	+	ENSG00000102904	TSNAXIP1	NA	protein_coding	NA	TSNAXIP1	-13.8	4.44	60	0.000783	0.00955	3.11
10	32000000	32100000	47400	-	ENSG00000170759	KIF5B	NA	protein_coding	NA	KIF5B	4.37	8.17	42.5	0.000783	0.00955	3.11
17	30800000	30900000	63900	+	ENSG00000176208	ATAD5	NA	protein_coding	NA	ATAD5	-12.9	5.13	59.9	0.000783	0.00955	3.11
17	4790000	4790000	1150	-	ENSG00000182853	VMO1	NA	protein_coding	NA	VMO1	-13.6	4.36	60	0.000783	0.00955	3.11
1	27900000	28000000	24200	+	ENSG00000130768	SMPDL3B	NA	protein_coding	NA	SMPDL3B	-13.4	4.61	59.9	0.000784	0.00955	3.11
15	53500000	53800000	249000	-	ENSG00000166415	WDR72	NA	protein_coding	NA	WDR72	-13.3	4.78	59.9	0.000784	0.00955	3.11
1	157000000	157000000	47200	-	ENSG00000183856	IQGAP3	NA	protein_coding	NA	IQGAP3	-12	5.16	42.5	0.000784	0.00955	3.11
22	29300000	29300000	6200	+	ENSG00000185340	GAS2L1	NA	protein_coding	NA	GAS2L1	-13.3	4.53	59.9	0.000784	0.00955	3.11
10	47500000	47500000	21800	-	ENSG00000204172	AGAP9	NA	protein_coding	NA	AGAP9	-15.6	6.46	59.9	0.000784	0.00955	3.11
1	67400000	67400000	22600	-	ENSG00000142864	SERBP1	NA	protein_coding	NA	SERBP1	6.94	12.2	42.5	0.000785	0.00955	3.1
12	52500000	52500000	5960	-	ENSG00000186081	KRT5	NA	protein_coding	NA	KRT5	-13.5	4.48	59.8	0.000787	0.00956	3.1
8	125000000	125000000	8050	+	ENSG00000173334	TRIB1	NA	protein_coding	NA	TRIB1	-13.6	4.58	59.8	0.000788	0.00956	3.1
9	39400000	39400000	6290	+	ENSG00000204849	SPATA31A1	NA	protein_coding	NA	SPATA31A1	-17	7.14	59.8	0.000788	0.00956	3.1
6	36100000	36100000	16700	+	ENSG00000156711	MAPK13	NA	protein_coding	NA	MAPK13	-13.2	4.21	59.8	0.000789	0.00956	3.1
2	74200000	74300000	127000	-	ENSG00000188687	SLC4A5	NA	protein_coding	NA	SLC4A5	-12.3	4.64	42.4	0.000789	0.00956	3.1
X	49000000	49000000	28500	-	ENSG00000068400	GRIPAP1	NA	protein_coding	NA	GRIPAP1	5.12	7.06	42.3	0.00079	0.00956	3.1
3	196000000	196000000	20200	+	ENSG00000176945	MUC20	NA	protein_coding	NA	MUC20	-14	5.19	59.7	0.00079	0.00956	3.1
12	114000000	114000000	54500	-	ENSG00000089225	TBX5	NA	protein_coding	NA	TBX5	-11.8	4.08	42.3	0.000791	0.00956	3.1
4	30700000	31100000	426000	+	ENSG00000169851	PCDH7	NA	protein_coding	NA	PCDH7	6.02	9.02	42.3	0.000791	0.00956	3.1
X	130000000	130000000	23600	+	ENSG00000156697	UTP14A	NA	protein_coding	NA	UTP14A	-13.6	4.4	59.6	0.000792	0.00956	3.1
10	88300000	88600000	311000	-	ENSG00000184719	RNLS	NA	protein_coding	NA	RNLS	-12.6	4.56	59.6	0.000792	0.00956	3.1
1	208000000	208000000	93300	+	ENSG00000197721	CR1L	NA	protein_coding	NA	CR1L	-14.6	5.19	59.6	0.000792	0.00956	3.1
16	27500000	27500000	90400	-	ENSG00000077235	GTF3C1	NA	protein_coding	NA	GTF3C1	-14.2	5.49	59.6	0.000793	0.00956	3.1
1	238000000	238000000	13100	-	ENSG00000116996	ZP4	NA	protein_coding	NA	ZP4	-13.2	4.19	59.6	0.000793	0.00956	3.1
10	123000000	123000000	83100	+	ENSG00000187908	DMBT1	NA	protein_coding	NA	DMBT1	-15.6	6.6	59.6	0.000793	0.00956	3.1
2	177000000	177000000	11400	+	ENSG00000170144	HNRNPA3	NA	protein_coding	NA	HNRNPA3	6.72	11.8	42.3	0.000794	0.00956	3.1
20	31900000	31900000	74300	+	ENSG00000131044	TTLL9	NA	protein_coding	NA	TTLL9	-13.1	4.26	59.5	0.000795	0.00957	3.1
16	18300000	18400000	18100	-	ENSG00000205746	AC126755.1	NA	transcribed_unprocessed_pseudogene	NA	AC126755.1	-16	5.07	59.5	0.000795	0.00957	3.1
19	38600000	38600000	31200	-	ENSG00000104814	MAP4K1	NA	protein_coding	NA	MAP4K1	-13.6	4.31	59.4	0.000798	0.00959	3.1
19	2730000	2740000	7820	-	ENSG00000141873	SLC39A3	NA	protein_coding	NA	SLC39A3	-13.9	4.95	59.4	0.000798	0.00959	3.1
1	6410000	6420000	12300	-	ENSG00000069812	HES2	NA	protein_coding	NA	HES2	-14.7	4.04	59.4	0.000799	0.0096	3.1
19	57400000	57400000	10800	+	ENSG00000186272	ZNF17	NA	protein_coding	NA	ZNF17	-13.5	4.54	59.4	0.0008	0.0096	3.1
X	136000000	136000000	8170	-	ENSG00000228836	CT45A5	NA	protein_coding	NA	CT45A5	-12.3	4.94	59.3	0.000802	0.00962	3.1
19	41400000	41400000	3370	-	ENSG00000177191	B3GNT8	NA	protein_coding	NA	B3GNT8	-13.6	4.73	59.3	0.000803	0.00962	3.1
15	34300000	34400000	14400	+	ENSG00000184507	NUTM1	NA	protein_coding	NA	NUTM1	-13	4.5	59.3	0.000803	0.00962	3.1
2	84800000	84900000	85400	-	ENSG00000186854	TRABD2A	NA	protein_coding	NA	TRABD2A	-13.1	4.88	42.1	0.000803	0.00962	3.1
5	146000000	147000000	64700	+	ENSG00000113649	TCERG1	NA	protein_coding	NA	TCERG1	5.08	9.39	42	0.000805	0.00963	3.09
2	206000000	206000000	39800	+	ENSG00000204186	ZDBF2	NA	protein_coding	NA	ZDBF2	-13.4	5.54	59.2	0.000805	0.00963	3.09
19	48800000	48900000	31500	-	ENSG00000105559	PLEKHA4	NA	protein_coding	NA	PLEKHA4	-13	4.37	59.1	0.000808	0.00963	3.09
12	96200000	96300000	75400	+	ENSG00000111145	ELK3	NA	protein_coding	NA	ELK3	6.29	8.24	42	0.000808	0.00963	3.09
8	141000000	142000000	73400	-	ENSG00000226807	MROH5	NA	polymorphic_pseudogene	NA	MROH5	-14.2	4.55	59.1	0.000808	0.00963	3.09
12	50100000	50100000	26100	+	ENSG00000110881	ASIC1	NA	protein_coding	NA	ASIC1	-13.9	4.76	59.1	0.000809	0.00963	3.09
1	201000000	201000000	46000	-	ENSG00000118197	DDX59	NA	protein_coding	NA	DDX59	-12.1	4.4	59.1	0.000809	0.00963	3.09
19	40600000	40600000	14500	+	ENSG00000160410	SHKBP1	NA	protein_coding	NA	SHKBP1	-14	4.98	59.1	0.000809	0.00963	3.09
6	129000000	130000000	633000	+	ENSG00000196569	LAMA2	NA	protein_coding	NA	LAMA2	-15.2	6.07	59.1	0.000809	0.00963	3.09
8	615000	738000	123000	-	ENSG00000104714	ERICH1	NA	protein_coding	NA	ERICH1	-13.5	4.55	59	0.00081	0.00963	3.09
5	174000000	174000000	9520	-	ENSG00000145919	BOD1	NA	protein_coding	NA	BOD1	-14.1	4.77	59	0.00081	0.00963	3.09
8	103000000	103000000	67600	-	ENSG00000155096	AZIN1	NA	protein_coding	NA	AZIN1	7.66	9.62	41.9	0.00081	0.00963	3.09
1	158000000	158000000	3850	+	ENSG00000158477	CD1A	NA	protein_coding	NA	CD1A	-13.5	4.36	59	0.00081	0.00963	3.09
1	201000000	201000000	18800	-	ENSG00000118194	TNNT2	NA	protein_coding	NA	TNNT2	-14.2	4.54	59	0.000811	0.00963	3.09
7	22900000	23000000	125000	-	ENSG00000122591	FAM126A	NA	protein_coding	NA	FAM126A	5.4	5.79	41.9	0.000811	0.00963	3.09
19	19500000	19500000	13300	+	ENSG00000186010	NDUFA13	NA	protein_coding	NA	NDUFA13	-12.9	4.26	59	0.000811	0.00963	3.09
5	139000000	139000000	21700	-	ENSG00000113013	HSPA9	NA	protein_coding	NA	HSPA9	5.98	6.86	41.9	0.000813	0.00963	3.09
1	157000000	157000000	2540	+	ENSG00000163382	NAXE	NA	protein_coding	NA	NAXE	-13.2	4.65	58.9	0.000813	0.00963	3.09
10	49600000	49600000	2410	+	ENSG00000187714	SLC18A3	NA	protein_coding	NA	SLC18A3	-13.3	4.18	59	0.000813	0.00963	3.09
3	42900000	42900000	13200	+	ENSG00000182983	ZNF662	NA	protein_coding	NA	ZNF662	-12.8	4.39	58.9	0.000814	0.00963	3.09
8	20200000	20300000	57800	-	ENSG00000061337	LZTS1	NA	protein_coding	NA	LZTS1	-14.3	4.78	58.9	0.000815	0.00963	3.09
10	128000000	128000000	29800	-	ENSG00000148773	MKI67	NA	protein_coding	NA	MKI67	-14.5	5.87	58.9	0.000815	0.00963	3.09
17	76300000	76400000	75000	-	ENSG00000161542	PRPSAP1	NA	protein_coding	NA	PRPSAP1	4.55	7.53	41.8	0.000815	0.00963	3.09
10	37800000	37900000	81600	-	ENSG00000198105	ZNF248	NA	protein_coding	NA	ZNF248	-13.6	5.19	58.9	0.000815	0.00963	3.09
2	127000000	127000000	36500	-	ENSG00000186684	CYP27C1	NA	protein_coding	NA	CYP27C1	-12.8	4.47	58.8	0.000816	0.00963	3.09
2	47200000	47200000	16800	-	ENSG00000143933	CALM2	NA	protein_coding	NA	CALM2	7.37	9.01	41.8	0.000817	0.00964	3.09
4	53400000	53500000	83200	+	ENSG00000145216	FIP1L1	NA	protein_coding	NA	FIP1L1	4.49	6.79	41.8	0.000818	0.00964	3.09
3	113000000	114000000	72500	-	ENSG00000163611	SPICE1	NA	protein_coding	NA	SPICE1	-12.7	4.82	58.8	0.000818	0.00964	3.09
15	32600000	32600000	24800	+	ENSG00000198826	ARHGAP11A	NA	protein_coding	NA	ARHGAP11A	-13.4	5	58.8	0.000818	0.00964	3.09
9	32300000	32300000	898	-	ENSG00000225347	SLC25A5P8	NA	processed_pseudogene	NA	SLC25A5P8	15.4	5.98	103	0.000819	0.00964	3.09
14	74500000	74500000	3350	+	ENSG00000165898	ISCA2	NA	protein_coding	NA	ISCA2	5.99	5.9	41.7	0.00082	0.00964	3.09
7	33000000	33000000	49500	+	ENSG00000122642	FKBP9	NA	protein_coding	NA	FKBP9	-12.9	4.47	58.7	0.000821	0.00964	3.09
19	43500000	43500000	30000	-	ENSG00000176531	PHLDB3	NA	protein_coding	NA	PHLDB3	-13.8	4.73	58.7	0.000821	0.00964	3.09
1	1510000	1530000	22500	+	ENSG00000197785	ATAD3A	NA	protein_coding	NA	ATAD3A	-7.14	6.32	41.7	0.000821	0.00964	3.09
11	11800000	12000000	120000	+	ENSG00000170242	USP47	NA	protein_coding	NA	USP47	4.5	7.03	41.7	0.000822	0.00964	3.09
8	23300000	23300000	26200	+	ENSG00000104679	R3HCC1	NA	protein_coding	NA	R3HCC1	-13.2	4.37	58.6	0.000823	0.00965	3.08
11	27700000	27700000	67200	-	ENSG00000176697	BDNF	NA	protein_coding	NA	BDNF	-5.34	5.49	41.7	0.000823	0.00965	3.08
4	1290000	1340000	50300	+	ENSG00000090316	MAEA	NA	protein_coding	NA	MAEA	-4.82	5.83	41.7	0.000824	0.00965	3.08
8	31000000	31200000	142000	+	ENSG00000165392	WRN	NA	protein_coding	NA	WRN	-12	5.59	41.7	0.000824	0.00965	3.08
11	57400000	57400000	20600	-	ENSG00000134802	SLC43A3	NA	protein_coding	NA	SLC43A3	-13	4.33	58.6	0.000825	0.00965	3.08
12	25000000	25100000	104000	+	ENSG00000118308	LRMP	NA	protein_coding	NA	LRMP	-14.3	4.7	58.5	0.000826	0.00965	3.08
8	76700000	76900000	186000	+	ENSG00000091656	ZFHX4	NA	protein_coding	NA	ZFHX4	5.35	9.31	41.6	0.000828	0.00965	3.08
19	12800000	12900000	110000	-	ENSG00000095066	HOOK2	NA	protein_coding	NA	HOOK2	-14.2	4.89	58.4	0.000828	0.00965	3.08
2	664000	677000	13500	-	ENSG00000151353	TMEM18	NA	protein_coding	NA	TMEM18	-12.9	4.23	58.5	0.000828	0.00965	3.08
7	158000000	159000000	1050000	-	ENSG00000155093	PTPRN2	NA	protein_coding	NA	PTPRN2	-12.3	5.54	41.6	0.000828	0.00965	3.08
7	157000000	157000000	16600	-	ENSG00000130675	MNX1	NA	protein_coding	NA	MNX1	-9.4	4.76	41.6	0.000829	0.00965	3.08
19	61000	71600	10700	-	ENSG00000282458	WASH5P	NA	transcribed_processed_pseudogene	NA	WASH5P	-13.5	4.87	58.4	0.000829	0.00965	3.08
2	48500000	48800000	247000	+	ENSG00000068781	STON1-GTF2A1L	NA	protein_coding	NA	STON1-GTF2A1L	-11.4	5.08	41.5	0.00083	0.00965	3.08
22	21800000	21900000	113000	-	ENSG00000100030	MAPK1	NA	protein_coding	NA	MAPK1	9.32	7.77	41.5	0.00083	0.00965	3.08
19	17400000	17400000	25900	-	ENSG00000130300	PLVAP	NA	protein_coding	NA	PLVAP	-14.5	4.48	58.4	0.00083	0.00965	3.08
8	39000000	39000000	8020	-	ENSG00000169490	TM2D2	NA	protein_coding	NA	TM2D2	-13.8	4.61	58.4	0.00083	0.00965	3.08
3	69700000	70000000	229000	+	ENSG00000187098	MITF	NA	protein_coding	NA	MITF	4.92	8.64	41.5	0.000831	0.00965	3.08
11	125000000	125000000	15200	-	ENSG00000150433	TMEM218	NA	protein_coding	NA	TMEM218	-13.1	4.25	58.3	0.000832	0.00965	3.08
11	67400000	67400000	23000	-	ENSG00000172531	PPP1CA	NA	protein_coding	NA	PPP1CA	5.55	8.06	58.3	0.000832	0.00965	3.08
2	162000000	163000000	467000	-	ENSG00000184611	KCNH7	NA	protein_coding	NA	KCNH7	-12.6	4.87	58.3	0.000832	0.00965	3.08
19	37200000	37200000	30800	+	ENSG00000188283	ZNF383	NA	protein_coding	NA	ZNF383	-12.8	4.43	58.3	0.000832	0.00965	3.08
11	126000000	126000000	33500	+	ENSG00000134910	STT3A	NA	protein_coding	NA	STT3A	6.42	8.85	41.5	0.000834	0.00966	3.08
3	16200000	16200000	57300	+	ENSG00000131386	GALNT15	NA	protein_coding	NA	GALNT15	-13.5	4.69	58.2	0.000836	0.00966	3.08
1	53100000	53100000	55500	-	ENSG00000162383	SLC1A7	NA	protein_coding	NA	SLC1A7	-13.3	4.57	58.2	0.000836	0.00966	3.08
8	144000000	144000000	20100	+	ENSG00000173137	ADCK5	NA	protein_coding	NA	ADCK5	-14.7	6.03	58.2	0.000836	0.00966	3.08
20	38900000	39000000	26800	+	ENSG00000101447	FAM83D	NA	protein_coding	NA	FAM83D	-13.4	4.18	58.2	0.000837	0.00966	3.08
11	57300000	57300000	9910	-	ENSG00000149136	SSRP1	NA	protein_coding	NA	SSRP1	5.38	6.7	41.4	0.000837	0.00966	3.08
7	143000000	143000000	14500	-	ENSG00000165125	TRPV6	NA	protein_coding	NA	TRPV6	-13.7	4.81	58.2	0.000837	0.00966	3.08
1	7780000	7850000	60900	+	ENSG00000049246	PER3	NA	protein_coding	NA	PER3	-12.7	4.38	58.1	0.000838	0.00966	3.08
10	73400000	73500000	59600	-	ENSG00000107758	PPP3CB	NA	protein_coding	NA	PPP3CB	7.04	10.3	41.4	0.000838	0.00966	3.08
16	87500000	87500000	517	+	ENSG00000276393	AC105429.2	NA	unprocessed_pseudogene	NA	AC105429.2	15	5.63	102	0.000838	0.00966	3.08
1	228000000	228000000	114000	+	ENSG00000181450	ZNF678	NA	protein_coding	NA	ZNF678	-13.1	4.41	58.1	0.000839	0.00966	3.08
4	151000000	151000000	223000	-	ENSG00000109686	SH3D19	NA	protein_coding	NA	SH3D19	-13	4.86	58.1	0.00084	0.00966	3.08
19	57400000	57400000	13100	+	ENSG00000188785	ZNF548	NA	protein_coding	NA	ZNF548	-12.5	4.71	58.1	0.00084	0.00966	3.08
4	145000000	145000000	267000	-	ENSG00000164162	ANAPC10	NA	protein_coding	NA	ANAPC10	14.3	5.32	58	0.000841	0.00966	3.08
10	47700000	47700000	40700	+	ENSG00000189014	SHLD2P3	NA	unprocessed_pseudogene	NA	SHLD2P3	-12.5	4.33	58	0.000841	0.00966	3.08
1	207000000	207000000	19900	-	ENSG00000162894	FCMR	NA	protein_coding	NA	FCMR	-12.8	4.38	58	0.000842	0.00966	3.07
1	96700000	96800000	102000	+	ENSG00000117569	PTBP2	NA	protein_coding	NA	PTBP2	4.8	5.98	41.3	0.000843	0.00966	3.07
2	95300000	95300000	16900	+	ENSG00000155066	PROM2	NA	protein_coding	NA	PROM2	-14.4	5.01	58	0.000843	0.00966	3.07
18	77000000	77100000	155000	-	ENSG00000197971	MBP	NA	protein_coding	NA	MBP	6.02	9.81	41.3	0.000843	0.00966	3.07
2	53500000	53900000	327000	-	ENSG00000115239	ASB3	NA	protein_coding	NA	ASB3	-8.65	5.13	41.3	0.000844	0.00966	3.07
1	84600000	84700000	47100	-	ENSG00000117155	SSX2IP	NA	protein_coding	NA	SSX2IP	-13.1	4.82	58	0.000844	0.00966	3.07
X	135000000	135000000	58400	+	ENSG00000156500	FAM122C	NA	protein_coding	NA	FAM122C	-13.2	5.01	57.9	0.000845	0.00966	3.07
3	45900000	46000000	77900	-	ENSG00000163820	FYCO1	NA	protein_coding	NA	FYCO1	-14.1	4.72	57.9	0.000845	0.00966	3.07
1	149000000	149000000	77400	+	ENSG00000286219	NOTCH2NLC	NA	protein_coding	NA	NOTCH2NLC	-12	4.03	41.2	0.000845	0.00966	3.07
10	114000000	114000000	110000	-	ENSG00000169129	AFAP1L2	NA	protein_coding	NA	AFAP1L2	-13.1	4.62	57.9	0.000846	0.00966	3.07
16	8890000	8960000	72400	-	ENSG00000187555	USP7	NA	protein_coding	NA	USP7	7.02	10.5	41.2	0.000846	0.00966	3.07
7	99800000	99800000	27300	-	ENSG00000160868	CYP3A4	NA	protein_coding	NA	CYP3A4	-12.4	4.31	57.8	0.000847	0.00966	3.07
17	44700000	44800000	43700	+	ENSG00000161692	DBF4B	NA	protein_coding	NA	DBF4B	-14.6	5.33	57.9	0.000847	0.00966	3.07
19	18600000	18700000	34700	+	ENSG00000167487	KLHL26	NA	protein_coding	NA	KLHL26	-16	5.42	57.8	0.000848	0.00966	3.07
15	77900000	77900000	12600	-	ENSG00000260776	AC104758.3	NA	transcribed_unprocessed_pseudogene	NA	AC104758.3	-13.6	4.56	57.8	0.000848	0.00966	3.07
2	98300000	98400000	52400	+	ENSG00000144191	CNGA3	NA	protein_coding	NA	CNGA3	-14.2	4.75	57.8	0.000849	0.00966	3.07
2	96500000	96500000	10500	-	ENSG00000163121	NEURL3	NA	protein_coding	NA	NEURL3	-14.2	5.07	57.8	0.00085	0.00966	3.07
9	34800000	34800000	6290	-	ENSG00000257198	FAM205BP	NA	transcribed_unprocessed_pseudogene	NA	FAM205BP	-13.3	4.81	57.8	0.00085	0.00966	3.07
1	75800000	75900000	116000	+	ENSG00000057468	MSH4	NA	protein_coding	NA	MSH4	-13.2	4.95	57.7	0.000851	0.00966	3.07
8	54500000	54900000	362000	+	ENSG00000104237	RP1	NA	protein_coding	NA	RP1	-10.9	5.82	41.1	0.000851	0.00966	3.07
7	123000000	124000000	82900	-	ENSG00000164675	IQUB	NA	protein_coding	NA	IQUB	-11.8	4.45	57.7	0.000851	0.00966	3.07
2	3590000	3640000	49800	+	ENSG00000118004	COLEC11	NA	protein_coding	NA	COLEC11	-12.6	4.45	57.7	0.000852	0.00966	3.07
8	51300000	51800000	490000	-	ENSG00000147485	PXDNL	NA	protein_coding	NA	PXDNL	-12.7	4.28	57.7	0.000852	0.00966	3.07
6	150000000	150000000	45600	-	ENSG00000120256	LRP11	NA	protein_coding	NA	LRP11	-12.7	5.25	41.1	0.000853	0.00966	3.07
19	56200000	56400000	149000	-	ENSG00000131848	ZSCAN5A	NA	protein_coding	NA	ZSCAN5A	-13.6	4.47	57.6	0.000853	0.00966	3.07
3	45800000	45800000	41100	-	ENSG00000163817	SLC6A20	NA	protein_coding	NA	SLC6A20	-14.3	4.77	57.7	0.000853	0.00966	3.07
19	57300000	57300000	10300	+	ENSG00000178229	ZNF543	NA	protein_coding	NA	ZNF543	-11.9	4.78	57.6	0.000854	0.00966	3.07
19	2900000	2920000	17600	+	ENSG00000171970	ZNF57	NA	protein_coding	NA	ZNF57	-12.3	4.55	57.6	0.000855	0.00966	3.07
11	46600000	46600000	15000	-	ENSG00000180423	HARBI1	NA	protein_coding	NA	HARBI1	-12.7	4.47	57.6	0.000855	0.00966	3.07
9	128000000	128000000	15500	+	ENSG00000167094	TTC16	NA	protein_coding	NA	TTC16	-13.4	4.18	57.6	0.000856	0.00966	3.07
11	393000	405000	12300	+	ENSG00000184363	PKP3	NA	protein_coding	NA	PKP3	-13.5	4.17	57.6	0.000856	0.00966	3.07
12	44500000	44900000	414000	-	ENSG00000184613	NELL2	NA	protein_coding	NA	NELL2	-12.7	4.97	57.6	0.000856	0.00966	3.07
12	56700000	56700000	25100	-	ENSG00000110958	PTGES3	NA	protein_coding	NA	PTGES3	5.59	7.65	41	0.000857	0.00966	3.07
19	19500000	19500000	8410	+	ENSG00000160161	CILP2	NA	protein_coding	NA	CILP2	-15.3	6.15	57.5	0.000857	0.00966	3.07
5	73600000	73900000	316000	+	ENSG00000214944	ARHGEF28	NA	protein_coding	NA	ARHGEF28	-14.2	5.17	57.5	0.000857	0.00966	3.07
3	42500000	42500000	48300	+	ENSG00000114812	VIPR1	NA	protein_coding	NA	VIPR1	-13.9	4.98	57.5	0.000858	0.00966	3.07
X	108000000	108000000	284000	-	ENSG00000197565	COL4A6	NA	protein_coding	NA	COL4A6	-13	4.33	57.5	0.000858	0.00966	3.07
19	57800000	57900000	40300	-	ENSG00000204514	ZNF814	NA	protein_coding	NA	ZNF814	-15.7	5.54	57.5	0.000858	0.00966	3.07
1	54800000	54900000	37600	-	ENSG00000116133	DHCR24	NA	protein_coding	NA	DHCR24	5.79	9.62	41	0.000859	0.00966	3.07
1	159000000	159000000	55200	+	ENSG00000163565	IFI16	NA	protein_coding	NA	IFI16	-12.9	4.71	57.5	0.000859	0.00966	3.07
19	47200000	47200000	11900	-	ENSG00000105327	BBC3	NA	protein_coding	NA	BBC3	4.01	7.35	41	0.00086	0.00966	3.07
19	20600000	20700000	41700	-	ENSG00000188171	ZNF626	NA	protein_coding	NA	ZNF626	-14.5	4.83	57.4	0.00086	0.00966	3.07
3	193000000	194000000	194000	-	ENSG00000127249	ATP13A4	NA	protein_coding	NA	ATP13A4	-13	4.22	57.4	0.000861	0.00966	3.06
2	210000000	211000000	201000	+	ENSG00000021826	CPS1	NA	protein_coding	NA	CPS1	-10.4	4.8	40.9	0.000862	0.00966	3.06
6	99400000	99500000	89400	-	ENSG00000123552	USP45	NA	protein_coding	NA	USP45	-12	4.89	57.4	0.000862	0.00966	3.06
7	77000000	77000000	9440	-	ENSG00000186645	SPDYE17	NA	unprocessed_pseudogene	NA	SPDYE17	-13.8	4.91	57.4	0.000862	0.00966	3.06
X	41500000	41900000	409000	-	ENSG00000147044	CASK	NA	protein_coding	NA	CASK	6.8	9.73	40.9	0.000863	0.00966	3.06
19	11900000	12000000	25700	+	ENSG00000196757	ZNF700	NA	protein_coding	NA	ZNF700	-12.8	4.24	57.4	0.000863	0.00966	3.06
16	1780000	1790000	6260	+	ENSG00000095906	NUBP2	NA	protein_coding	NA	NUBP2	-13.8	4.57	57.3	0.000864	0.00966	3.06
3	108000000	108000000	288000	+	ENSG00000114439	BBX	NA	protein_coding	NA	BBX	4.9	8.63	40.9	0.000864	0.00966	3.06
9	96900000	96900000	11900	+	ENSG00000188152	NUTM2G	NA	protein_coding	NA	NUTM2G	-14.7	5.58	57.3	0.000865	0.00966	3.06
1	162000000	162000000	15500	+	ENSG00000072694	FCGR2B	NA	protein_coding	NA	FCGR2B	-12.7	4.58	57.3	0.000866	0.00966	3.06
4	169000000	169000000	177000	-	ENSG00000154447	SH3RF1	NA	protein_coding	NA	SH3RF1	-12.4	4.36	57.3	0.000866	0.00966	3.06
3	9840000	9840000	6750	-	ENSG00000156990	RPUSD3	NA	protein_coding	NA	RPUSD3	-11.5	4.15	40.9	0.000866	0.00966	3.06
21	10500000	10600000	84600	+	ENSG00000274391	TPTE	NA	protein_coding	NA	TPTE	-12.7	4.99	57.3	0.000866	0.00966	3.06
1	30900000	31100000	134000	-	ENSG00000134644	PUM1	NA	protein_coding	NA	PUM1	6	11.4	40.8	0.000867	0.00966	3.06
1	84400000	84400000	16500	+	ENSG00000137976	DNASE2B	NA	protein_coding	NA	DNASE2B	-12.6	4.7	57.2	0.000867	0.00966	3.06
19	55800000	55800000	51400	-	ENSG00000179873	NLRP11	NA	protein_coding	NA	NLRP11	-8.1	4.2	40.8	0.000867	0.00966	3.06
19	50700000	50700000	57600	-	ENSG00000161681	SHANK1	NA	protein_coding	NA	SHANK1	-6.27	6.48	40.8	0.000868	0.00966	3.06
2	96000000	96000000	17500	-	ENSG00000186281	GPAT2	NA	protein_coding	NA	GPAT2	-13.7	4.56	57.2	0.000869	0.00966	3.06
1	197000000	197000000	32100	+	ENSG00000134389	CFHR5	NA	protein_coding	NA	CFHR5	-11.7	4.62	57.1	0.00087	0.00966	3.06
12	129000000	130000000	832000	-	ENSG00000151952	TMEM132D	NA	protein_coding	NA	TMEM132D	-13.2	4.47	57.2	0.00087	0.00966	3.06
3	55500000	56500000	960000	-	ENSG00000187672	ERC2	NA	protein_coding	NA	ERC2	-13.9	4.75	57.1	0.00087	0.00966	3.06
1	220000000	220000000	53900	+	ENSG00000067704	IARS2	NA	protein_coding	NA	IARS2	-13.4	5.48	57.1	0.000871	0.00966	3.06
1	212000000	212000000	17000	-	ENSG00000117650	NEK2	NA	protein_coding	NA	NEK2	-13	4.17	57.1	0.000871	0.00966	3.06
19	52000000	52000000	16900	-	ENSG00000197619	ZNF615	NA	protein_coding	NA	ZNF615	-12.1	4.63	57.1	0.000871	0.00966	3.06
20	23100000	23100000	6960	-	ENSG00000125810	CD93	NA	protein_coding	NA	CD93	-9.63	5.82	40.7	0.000872	0.00966	3.06
1	15500000	15500000	35700	-	ENSG00000132906	CASP9	NA	protein_coding	NA	CASP9	-14.9	5.23	57	0.000873	0.00966	3.06
7	142000000	142000000	199000	+	ENSG00000257335	MGAM	NA	protein_coding	NA	MGAM	-11.8	5.83	40.7	0.000873	0.00966	3.06
19	5890000	5900000	12700	-	ENSG00000174886	NDUFA11	NA	protein_coding	NA	NDUFA11	-14.1	4.37	57	0.000874	0.00966	3.06
3	109000000	109000000	105000	+	ENSG00000198919	DZIP3	NA	protein_coding	NA	DZIP3	-13.8	4.63	57	0.000874	0.00966	3.06
15	29700000	30000000	269000	-	ENSG00000104067	TJP1	NA	protein_coding	NA	TJP1	-4.82	5.8	40.7	0.000875	0.00966	3.06
19	58400000	58400000	16800	+	ENSG00000171574	ZNF584	NA	protein_coding	NA	ZNF584	-13.2	4.21	57	0.000875	0.00966	3.06
4	88400000	88400000	64400	+	ENSG00000138642	HERC6	NA	protein_coding	NA	HERC6	-13.4	4.58	57	0.000876	0.00966	3.06
1	146000000	146000000	18900	-	ENSG00000143127	ITGA10	NA	protein_coding	NA	ITGA10	-14.1	5.03	57	0.000876	0.00966	3.06
1	2590000	2590000	4980	+	ENSG00000157870	PRXL2B	NA	protein_coding	NA	PRXL2B	-13.9	4.48	57	0.000876	0.00966	3.06
8	68300000	68800000	488000	+	ENSG00000165084	C8orf34	NA	protein_coding	NA	C8orf34	-12.9	4.42	57	0.000876	0.00966	3.06
15	24700000	24700000	7690	+	ENSG00000185823	NPAP1	NA	protein_coding	NA	NPAP1	-8.97	5.33	40.6	0.000878	0.00966	3.06
19	49100000	49100000	3990	-	ENSG00000225950	NTF4	NA	protein_coding	NA	NTF4	-13.5	4.09	56.9	0.000878	0.00966	3.06
3	149000000	149000000	56400	-	ENSG00000071794	HLTF	NA	protein_coding	NA	HLTF	-12	4.87	56.9	0.000879	0.00966	3.06
6	128000000	128000000	211000	-	ENSG00000172673	THEMIS	NA	protein_coding	NA	THEMIS	-12.3	4.3	56.9	0.000879	0.00966	3.06
6	80100000	80100000	5910	-	ENSG00000218418	AL591135.1	NA	processed_pseudogene	NA	AL591135.1	-13.2	4.2	56.9	0.000879	0.00966	3.06
3	174000000	176000000	1370000	+	ENSG00000177694	NAALADL2	NA	protein_coding	NA	NAALADL2	-9.49	3.98	40.6	0.00088	0.00967	3.06
5	141000000	142000000	149000	+	ENSG00000253485	PCDHGA5	NA	protein_coding	NA	PCDHGA5	-13.7	4.27	56.9	0.00088	0.00967	3.06
17	40400000	40400000	29400	-	ENSG00000131747	TOP2A	NA	protein_coding	NA	TOP2A	4.59	6.82	40.6	0.000881	0.00967	3.06
1	26000000	26000000	16600	+	ENSG00000158008	EXTL1	NA	protein_coding	NA	EXTL1	-13.4	4.65	56.8	0.000883	0.00968	3.05
16	23300000	23400000	103000	+	ENSG00000168447	SCNN1B	NA	protein_coding	NA	SCNN1B	-13.4	4.65	56.7	0.000884	0.00968	3.05
3	105000000	106000000	210000	+	ENSG00000170017	ALCAM	NA	protein_coding	NA	ALCAM	4.15	7.3	40.5	0.000884	0.00968	3.05
19	35700000	35700000	3650	-	ENSG00000126246	IGFLR1	NA	protein_coding	NA	IGFLR1	-13.3	4.27	56.7	0.000885	0.00968	3.05
6	160000000	160000000	20500	+	ENSG00000146453	PNLDC1	NA	protein_coding	NA	PNLDC1	-12.8	4.52	56.7	0.000885	0.00968	3.05
5	55900000	55900000	71500	+	ENSG00000164509	IL31RA	NA	protein_coding	NA	IL31RA	-13.3	4.37	56.7	0.000885	0.00968	3.05
12	49200000	49200000	4290	-	ENSG00000167552	TUBA1A	NA	protein_coding	NA	TUBA1A	6.52	11.4	40.5	0.000885	0.00968	3.05
9	94000000	94000000	3730	-	ENSG00000131668	BARX1	NA	protein_coding	NA	BARX1	-13.4	4.09	56.6	0.000887	0.00969	3.05
4	184000000	184000000	133000	-	ENSG00000164303	ENPP6	NA	protein_coding	NA	ENPP6	-13.3	4.49	56.6	0.000887	0.00969	3.05
17	79100000	79100000	13700	+	ENSG00000167280	ENGASE	NA	protein_coding	NA	ENGASE	-14.2	4.2	56.6	0.000887	0.00969	3.05
12	66300000	66300000	45100	+	ENSG00000127311	HELB	NA	protein_coding	NA	HELB	-10.3	4.18	40.4	0.000888	0.00969	3.05
3	123000000	123000000	36700	-	ENSG00000138496	PARP9	NA	protein_coding	NA	PARP9	-13.6	4.61	56.6	0.000888	0.00969	3.05
10	97900000	98000000	166000	-	ENSG00000095713	CRTAC1	NA	protein_coding	NA	CRTAC1	-13.5	4.47	56.5	0.000891	0.00972	3.05
19	49700000	49700000	22800	+	ENSG00000169169	CPT1C	NA	protein_coding	NA	CPT1C	-13.6	4.43	56.5	0.000892	0.00972	3.05
6	47700000	47700000	36200	+	ENSG00000153294	ADGRF4	NA	protein_coding	NA	ADGRF4	-12.7	4.5	56.5	0.000893	0.00972	3.05
20	14300000	14300000	14600	-	ENSG00000125848	FLRT3	NA	protein_coding	NA	FLRT3	-12.8	5.11	56.4	0.000894	0.00972	3.05
4	54700000	54700000	82800	+	ENSG00000157404	KIT	NA	protein_coding	NA	KIT	-12.3	4.58	56.4	0.000894	0.00972	3.05
18	44700000	45100000	388000	+	ENSG00000152217	SETBP1	NA	protein_coding	NA	SETBP1	-12.9	4.54	56.4	0.000895	0.00972	3.05
17	43000000	43200000	126000	-	ENSG00000012048	BRCA1	NA	protein_coding	NA	BRCA1	-13.2	5.17	56.4	0.000896	0.00972	3.05
2	203000000	203000000	119000	+	ENSG00000138443	ABI2	NA	protein_coding	NA	ABI2	4.71	7.73	40.3	0.000896	0.00972	3.05
19	53800000	53800000	30800	-	ENSG00000142405	NLRP12	NA	protein_coding	NA	NLRP12	-13.1	4.33	56.4	0.000896	0.00972	3.05
16	89700000	89800000	79100	-	ENSG00000187741	FANCA	NA	protein_coding	NA	FANCA	-13.9	4.78	56.4	0.000896	0.00972	3.05
13	113000000	114000000	63600	+	ENSG00000150403	TMCO3	NA	protein_coding	NA	TMCO3	-13.3	4.68	56.3	0.000897	0.00972	3.05
1	152000000	152000000	21300	-	ENSG00000182134	TDRKH	NA	protein_coding	NA	TDRKH	5.66	8.1	40.3	0.000897	0.00972	3.05
2	9840000	9930000	91000	+	ENSG00000115750	TAF1B	NA	protein_coding	NA	TAF1B	-13.4	4.39	56.3	0.000898	0.00972	3.05
5	158000000	158000000	45800	-	ENSG00000039600	SOX30	NA	protein_coding	NA	SOX30	-13.1	4.46	56.3	0.000899	0.00972	3.05
3	58200000	58200000	22400	-	ENSG00000163687	DNASE1L3	NA	protein_coding	NA	DNASE1L3	-13.2	4.58	56.3	0.000899	0.00972	3.05
2	114000000	116000000	1400000	+	ENSG00000175497	DPP10	NA	protein_coding	NA	DPP10	-13.6	4.57	56.3	0.0009	0.00972	3.05
22	50000000	50100000	41800	-	ENSG00000138892	TTLL8	NA	protein_coding	NA	TTLL8	-14.5	4.63	56.2	0.000901	0.00972	3.05
10	15200000	15400000	160000	-	ENSG00000148468	FAM171A1	NA	protein_coding	NA	FAM171A1	-13.7	4.93	56.2	0.000901	0.00972	3.05
2	86800000	86800000	23800	-	ENSG00000153563	CD8A	NA	protein_coding	NA	CD8A	-12.6	4.32	56.2	0.000901	0.00972	3.05
1	16000000	16000000	15200	+	ENSG00000186510	CLCNKA	NA	protein_coding	NA	CLCNKA	-13.5	4.22	56.2	0.000901	0.00972	3.05
20	31600000	31600000	1230	+	ENSG00000125968	ID1	NA	protein_coding	NA	ID1	-13.5	4.09	56.2	0.000903	0.00972	3.04
3	49800000	49800000	9140	-	ENSG00000187492	CDHR4	NA	protein_coding	NA	CDHR4	-13.4	4.29	56.2	0.000903	0.00972	3.04
1	74200000	74500000	346000	+	ENSG00000259030	FPGT-TNNI3K	NA	protein_coding	NA	FPGT-TNNI3K	-11.2	5.02	40.2	0.000903	0.00972	3.04
4	168000000	168000000	103000	-	ENSG00000137628	DDX60	NA	protein_coding	NA	DDX60	-13.4	4.81	56.1	0.000904	0.00972	3.04
10	104000000	104000000	28800	-	ENSG00000148841	ITPRIP	NA	protein_coding	NA	ITPRIP	-13.3	4.42	56.2	0.000904	0.00972	3.04
9	137000000	137000000	7450	-	ENSG00000188833	ENTPD8	NA	protein_coding	NA	ENTPD8	-14	5.2	56.1	0.000904	0.00972	3.04
21	44600000	44600000	1240	+	ENSG00000243489	KRTAP10-11	NA	protein_coding	NA	KRTAP10-11	-14.1	4.73	56.2	0.000904	0.00972	3.04
15	82800000	82800000	26500	+	ENSG00000156232	WHAMM	NA	protein_coding	NA	WHAMM	-13.8	4.49	56.1	0.000905	0.00973	3.04
6	30200000	30200000	29000	-	ENSG00000234127	TRIM26	NA	protein_coding	NA	TRIM26	-12.4	3.65	40.1	0.000905	0.00973	3.04
19	571000	583000	12200	+	ENSG00000172270	BSG	NA	protein_coding	NA	BSG	-13.8	4.67	56.1	0.000906	0.00973	3.04
17	35500000	35600000	9970	-	ENSG00000236320	SLFN14	NA	protein_coding	NA	SLFN14	-13.4	4.07	56.1	0.000907	0.00973	3.04
18	12100000	12100000	35900	+	ENSG00000181626	ANKRD62	NA	protein_coding	NA	ANKRD62	-13.3	4.28	56	0.000908	0.00974	3.04
19	12400000	12400000	11300	-	ENSG00000180855	ZNF443	NA	protein_coding	NA	ZNF443	-13.1	4.37	56	0.000909	0.00974	3.04
7	57000000	57000000	17300	+	ENSG00000189166	TNRC18P3	NA	unprocessed_pseudogene	NA	TNRC18P3	-13	4.13	56	0.000909	0.00974	3.04
15	82500000	82500000	6820	+	ENSG00000277741	GOLGA6L17P	NA	transcribed_unprocessed_pseudogene	NA	GOLGA6L17P	-15.6	6.05	56	0.000909	0.00974	3.04
4	71100000	71600000	509000	+	ENSG00000080493	SLC4A4	NA	protein_coding	NA	SLC4A4	-12.9	4.24	56	0.00091	0.00974	3.04
2	191000000	191000000	122000	-	ENSG00000138378	STAT4	NA	protein_coding	NA	STAT4	-13.4	5.49	56	0.000911	0.00974	3.04
7	64700000	64700000	45500	+	ENSG00000196247	ZNF107	NA	protein_coding	NA	ZNF107	-13.7	5.29	56	0.000911	0.00974	3.04
14	67700000	67800000	89200	-	ENSG00000072121	ZFYVE26	NA	protein_coding	NA	ZFYVE26	-6.56	6.07	40	0.000912	0.00974	3.04
20	63700000	63700000	28700	+	ENSG00000197114	ZGPAT	NA	protein_coding	NA	ZGPAT	-13.3	4.29	55.9	0.000912	0.00974	3.04
20	10400000	10400000	33200	-	ENSG00000125863	MKKS	NA	protein_coding	NA	MKKS	-12.3	4.42	55.9	0.000913	0.00974	3.04
7	134000000	134000000	137000	+	ENSG00000155530	LRGUK	NA	protein_coding	NA	LRGUK	-13.7	4.68	55.9	0.000913	0.00974	3.04
19	5830000	5840000	9120	-	ENSG00000156413	FUT6	NA	protein_coding	NA	FUT6	-14	4.57	55.9	0.000913	0.00974	3.04
7	26200000	26200000	34900	+	ENSG00000050344	NFE2L3	NA	protein_coding	NA	NFE2L3	-13.1	4.59	55.9	0.000914	0.00975	3.04
16	48100000	48200000	75000	-	ENSG00000140798	ABCC12	NA	protein_coding	NA	ABCC12	-13.4	4.71	55.8	0.000915	0.00975	3.04
11	70400000	70400000	38200	+	ENSG00000085733	CTTN	NA	protein_coding	NA	CTTN	-12.9	4.15	55.8	0.000916	0.00975	3.04
2	114000000	114000000	72500	+	ENSG00000115091	ACTR3	NA	protein_coding	NA	ACTR3	6.15	10.4	39.9	0.000916	0.00975	3.04
19	48300000	48300000	25400	-	ENSG00000105479	CCDC114	NA	protein_coding	NA	CCDC114	-13.9	4.88	55.8	0.000917	0.00975	3.04
12	34000000	34000000	7230	+	ENSG00000139133	ALG10	NA	protein_coding	NA	ALG10	-13	4.25	55.8	0.000917	0.00975	3.04
X	37300000	37500000	108000	+	ENSG00000130962	PRRG1	NA	protein_coding	NA	PRRG1	-12.9	4.12	55.8	0.000918	0.00975	3.04
4	72300000	72600000	288000	-	ENSG00000156140	ADAMTS3	NA	protein_coding	NA	ADAMTS3	-13.6	4.86	55.7	0.000919	0.00975	3.04
16	16400000	16400000	14900	+	ENSG00000214967	NPIPA7	NA	protein_coding	NA	NPIPA7	-14.9	5.7	55.7	0.000919	0.00975	3.04
X	136000000	136000000	10100	+	ENSG00000268940	CT45A1	NA	protein_coding	NA	CT45A1	-14.5	5.87	55.7	0.000919	0.00975	3.04
2	174000000	174000000	47700	-	ENSG00000138433	CIR1	NA	protein_coding	NA	CIR1	5.74	7.81	39.9	0.00092	0.00975	3.04
11	67100000	67300000	139000	+	ENSG00000173120	KDM2A	NA	protein_coding	NA	KDM2A	6.68	9.43	39.9	0.00092	0.00975	3.04
19	3590000	3590000	8060	+	ENSG00000179855	GIPC3	NA	protein_coding	NA	GIPC3	-14.3	5.4	55.7	0.000921	0.00975	3.04
10	5680000	5760000	78900	+	ENSG00000108021	TASOR2	NA	protein_coding	NA	TASOR2	-14.7	5.76	55.7	0.000922	0.00975	3.04
14	102000000	102000000	91900	+	ENSG00000197102	DYNC1H1	NA	protein_coding	NA	DYNC1H1	4.79	9.62	39.8	0.000922	0.00975	3.04
19	1480000	1490000	9320	-	ENSG00000115257	PCSK4	NA	protein_coding	NA	PCSK4	-14.5	4.9	55.6	0.000923	0.00975	3.03
2	166000000	167000000	208000	-	ENSG00000136546	SCN7A	NA	protein_coding	NA	SCN7A	-13.8	5.21	55.6	0.000923	0.00975	3.03
1	236000000	236000000	223000	-	ENSG00000143669	LYST	NA	protein_coding	NA	LYST	-5.88	6.19	39.8	0.000923	0.00975	3.03
9	70000000	70200000	183000	+	ENSG00000165072	MAMDC2	NA	protein_coding	NA	MAMDC2	-12.4	4.24	55.6	0.000924	0.00975	3.03
20	62800000	62900000	20800	-	ENSG00000101190	TCFL5	NA	protein_coding	NA	TCFL5	-12.4	4.21	55.6	0.000925	0.00975	3.03
2	6840000	6870000	26100	-	ENSG00000134326	CMPK2	NA	protein_coding	NA	CMPK2	-12.9	4.57	55.6	0.000925	0.00975	3.03
1	113000000	113000000	97300	-	ENSG00000007341	ST7L	NA	protein_coding	NA	ST7L	4.34	6.78	39.8	0.000926	0.00975	3.03
3	48900000	48900000	1600	-	ENSG00000221883	ARIH2OS	NA	protein_coding	NA	ARIH2OS	-13.2	4.28	55.5	0.000926	0.00975	3.03
1	150000000	150000000	72900	-	ENSG00000264522	OTUD7B	NA	protein_coding	NA	OTUD7B	4.42	8.49	39.8	0.000926	0.00975	3.03
6	41000000	41100000	64200	-	ENSG00000124596	OARD1	NA	protein_coding	NA	OARD1	-12.7	4.3	55.5	0.000927	0.00975	3.03
X	110000000	110000000	109000	-	ENSG00000068366	ACSL4	NA	protein_coding	NA	ACSL4	8.11	9.18	39.7	0.000928	0.00975	3.03
9	121000000	121000000	41400	-	ENSG00000119402	FBXW2	NA	protein_coding	NA	FBXW2	5.36	9.12	39.8	0.000928	0.00975	3.03
17	69100000	69100000	63200	-	ENSG00000154262	ABCA6	NA	protein_coding	NA	ABCA6	-13.9	4.38	55.5	0.000928	0.00975	3.03
2	110000000	110000000	71300	-	ENSG00000186522	SEPTIN10	NA	protein_coding	NA	SEPTIN10	-12.7	4.3	55.5	0.000928	0.00975	3.03
19	44700000	44700000	11600	+	ENSG00000213892	CEACAM16	NA	protein_coding	NA	CEACAM16	-13	4.3	55.5	0.000928	0.00975	3.03
19	58000000	58100000	20600	+	ENSG00000152467	ZSCAN1	NA	protein_coding	NA	ZSCAN1	-14	4.61	55.5	0.000929	0.00975	3.03
15	58900000	58900000	54600	-	ENSG00000137776	SLTM	NA	protein_coding	NA	SLTM	4.37	9.79	39.7	0.000932	0.00977	3.03
5	177000000	177000000	19600	+	ENSG00000131183	SLC34A1	NA	protein_coding	NA	SLC34A1	-13.3	4.27	55.3	0.000933	0.00977	3.03
8	6500000	6560000	63800	-	ENSG00000091879	ANGPT2	NA	protein_coding	NA	ANGPT2	-12.2	4.41	55.3	0.000934	0.00977	3.03
7	129000000	129000000	31400	+	ENSG00000128596	CCDC136	NA	protein_coding	NA	CCDC136	-14.2	4.65	55.3	0.000934	0.00977	3.03
1	83900000	84000000	134000	-	ENSG00000137941	TTLL7	NA	protein_coding	NA	TTLL7	-12.7	5.06	55.3	0.000934	0.00977	3.03
9	83000000	83100000	83600	-	ENSG00000165105	RASEF	NA	protein_coding	NA	RASEF	-13.2	4.25	55.3	0.000934	0.00977	3.03
X	130000000	130000000	30600	+	ENSG00000122121	XPNPEP2	NA	protein_coding	NA	XPNPEP2	-13	4.27	55.3	0.000935	0.00977	3.03
1	28700000	28800000	33200	+	ENSG00000198492	YTHDF2	NA	protein_coding	NA	YTHDF2	6.71	11.5	39.6	0.000935	0.00977	3.03
5	141000000	142000000	153000	+	ENSG00000253910	PCDHGB2	NA	protein_coding	NA	PCDHGB2	-14.6	5.7	55.3	0.000935	0.00977	3.03
3	52400000	52400000	12100	-	ENSG00000010319	SEMA3G	NA	protein_coding	NA	SEMA3G	-14	5.03	55.2	0.000936	0.00977	3.03
1	62200000	62300000	83300	-	ENSG00000132854	KANK4	NA	protein_coding	NA	KANK4	-12.7	4.41	55.3	0.000936	0.00977	3.03
19	35500000	35500000	16400	-	ENSG00000161249	DMKN	NA	protein_coding	NA	DMKN	-13.3	4.54	55.3	0.000936	0.00977	3.03
13	95700000	95800000	118000	+	ENSG00000102580	DNAJC3	NA	protein_coding	NA	DNAJC3	-10.7	5.66	39.6	0.000938	0.00978	3.03
10	15800000	15900000	82300	-	ENSG00000148481	MINDY3	NA	protein_coding	NA	MINDY3	5.02	7.13	39.5	0.00094	0.00979	3.03
2	178000000	178000000	26600	+	ENSG00000155636	RBM45	NA	protein_coding	NA	RBM45	-12.8	4.29	55.2	0.00094	0.00979	3.03
1	177000000	177000000	111000	+	ENSG00000198797	BRINP2	NA	protein_coding	NA	BRINP2	-13.3	4.81	55	0.000944	0.00983	3.02
3	49900000	50100000	160000	+	ENSG00000004534	RBM6	NA	protein_coding	NA	RBM6	4.33	8.51	39.5	0.000946	0.00983	3.02
3	150000000	150000000	219000	-	ENSG00000018408	WWTR1	NA	protein_coding	NA	WWTR1	-13	5.03	39.4	0.000946	0.00983	3.02
11	36500000	36600000	82400	+	ENSG00000166349	RAG1	NA	protein_coding	NA	RAG1	-12.6	4.2	55	0.000946	0.00983	3.02
19	38400000	38400000	3820	-	ENSG00000179168	GGN	NA	protein_coding	NA	GGN	-15.1	5.62	95	0.000946	0.00983	3.02
10	45700000	45800000	65800	+	ENSG00000172661	WASHC2C	NA	protein_coding	NA	WASHC2C	-6.07	6.23	39.4	0.000947	0.00983	3.02
12	128000000	129000000	441000	+	ENSG00000181234	TMEM132C	NA	protein_coding	NA	TMEM132C	-13.5	4.28	55	0.000947	0.00983	3.02
22	21500000	21500000	4850	+	ENSG00000206140	TMEM191C	NA	protein_coding	NA	TMEM191C	-10.9	5.35	39.4	0.000948	0.00983	3.02
13	98900000	99000000	729	-	ENSG00000231981	RPL7L1P12	NA	processed_pseudogene	NA	RPL7L1P12	15	5.61	95	0.000948	0.00983	3.02
7	23700000	23800000	122000	+	ENSG00000196335	STK31	NA	protein_coding	NA	STK31	-14.9	5.52	54.9	0.000949	0.00983	3.02
10	112000000	112000000	54400	+	ENSG00000197142	ACSL5	NA	protein_coding	NA	ACSL5	-11.8	4.74	54.9	0.000949	0.00983	3.02
X	14900000	14900000	48900	+	ENSG00000130150	MOSPD2	NA	protein_coding	NA	MOSPD2	-13.5	4.3	54.9	0.00095	0.00983	3.02
11	130000000	130000000	50600	+	ENSG00000149418	ST14	NA	protein_coding	NA	ST14	-6.85	5.29	39.4	0.00095	0.00983	3.02
11	66500000	66500000	25600	-	ENSG00000174165	ZDHHC24	NA	protein_coding	NA	ZDHHC24	-14	4.6	54.9	0.00095	0.00983	3.02
10	114000000	114000000	53000	+	ENSG00000095627	TDRD1	NA	protein_coding	NA	TDRD1	-12.7	4.13	54.8	0.000952	0.00984	3.02
13	32300000	32400000	85200	+	ENSG00000139618	BRCA2	NA	protein_coding	NA	BRCA2	-14.2	6.08	54.8	0.000953	0.00985	3.02
5	141000000	142000000	143000	+	ENSG00000262209	PCDHGB3	NA	protein_coding	NA	PCDHGB3	-13.5	4.66	54.7	0.000955	0.00986	3.02
2	27400000	27400000	14500	+	ENSG00000115216	NRBP1	NA	protein_coding	NA	NRBP1	4.18	8.95	39.3	0.000956	0.00987	3.02
2	29100000	29100000	13500	-	ENSG00000179270	PCARE	NA	protein_coding	NA	PCARE	-14.1	4.81	54.7	0.000956	0.00987	3.02
10	98400000	98400000	31600	-	ENSG00000119943	PYROXD2	NA	protein_coding	NA	PYROXD2	-13	4.86	54.7	0.000958	0.00987	3.02
7	47300000	47600000	307000	-	ENSG00000136205	TNS3	NA	protein_coding	NA	TNS3	-8.86	6.1	39.2	0.000959	0.00987	3.02
8	11500000	11600000	77700	+	ENSG00000136573	BLK	NA	protein_coding	NA	BLK	-11.8	4.21	39.2	0.000959	0.00987	3.02
2	71000000	71000000	7120	+	ENSG00000144031	ANKRD53	NA	protein_coding	NA	ANKRD53	-14.3	4.95	54.6	0.000959	0.00987	3.02
1	162000000	163000000	32400	+	ENSG00000152332	UHMK1	NA	protein_coding	NA	UHMK1	4.59	8.4	39.2	0.000959	0.00987	3.02
19	52000000	52100000	64400	-	ENSG00000256087	ZNF432	NA	protein_coding	NA	ZNF432	-11.5	4.71	54.6	0.000959	0.00987	3.02
1	20700000	20700000	54000	-	ENSG00000117245	KIF17	NA	protein_coding	NA	KIF17	-13	4.15	54.6	0.00096	0.00987	3.02
12	71400000	71600000	147000	+	ENSG00000139292	LGR5	NA	protein_coding	NA	LGR5	-11.7	4.48	54.6	0.000961	0.00988	3.02
5	176000000	176000000	117000	-	ENSG00000051596	THOC3	NA	protein_coding	NA	THOC3	-13.3	4.3	54.6	0.000962	0.00988	3.02
[truncated: 7,671 more rows]
