# Supplementary material for: Chikungunya virus time course infection of human macrophages reveals intracellular signaling pathways relevant to repurposed therapeutics
Source: PeerJ. 2022 Mar 21;10:e13090. doi: 10.7717/peerj.13090 (PMC8944338; doi:10.7717/peerj.13090)
Supplement: Supplemental Information 2 [file peerj-10-13090-s002.xlsx]

## Sheet: GO Terms 48hpi
Category	Count	%	PValue	List	Total	Pop	Hits	Pop	Total	FDR
GO:0046872~metal ion binding	1060	11.9034	2.27e-11	7497	2069	16881	1.1536	6.9e-08	6.9e-08	6.89e-08
GO:0003676~nucleic acid binding	537	6.03032	5.21e-11	7497	985	16881	1.22758	1.59e-07	7.93e-08	7.92e-08
GO:0007155~cell adhesion	260	2.91971	9.97e-08	7453	459	16792	1.27624	0.000868	0.000652	0.000652
GO:0030198~extracellular matrix organization	124	1.39248	1.5e-07	7453	196	16792	1.4254	0.001304	0.000652	0.000652
GO:0005044~scavenger receptor activity	38	0.426727	4e-06	7497	48	16881	1.7826	0.012101	0.004058	0.004053
GO:0005201~extracellular matrix structural constituent	48	0.539023	1.77e-05	7497	67	16881	1.61316	0.052326	0.013436	0.013418
GO:0004497~monooxygenase activity	42	0.471645	4.53e-05	7497	58	16881	1.63054	0.12895	0.027611	0.027574
GO:0007156~homophilic cell adhesion via plasma membrane adhesion molecules	98	1.10051	1.16e-05	7453	158	16792	1.39746	0.096067	0.033663	0.033663
GO:0005524~ATP binding	729	8.18641	0.000264	7497	1495	16881	1.09799	0.551847	0.119591	0.119434
GO:0005509~calcium ion binding	365	4.09882	0.000275	7497	717	16881	1.14626	0.567102	0.119591	0.119434
GO:0070330~aromatase activity	22	0.247052	0.000431	7497	27	16881	1.83472	0.730744	0.163976	0.163761
GO:0042626~ATPase activity, coupled to transmembrane movement of substances	31	0.348119	0.001233	7497	44	16881	1.58642	0.976653	0.417218	0.41667
GO:0004842~ubiquitin-protein transferase activity	173	1.94273	0.002271	7497	329	16881	1.18403	0.999015	0.665413	0.664539
GO:0005518~collagen binding	39	0.437956	0.002404	7497	60	16881	1.46361	0.999343	0.665413	0.664539
GO:0004872~receptor activity	118	1.3251	0.00289	7497	217	16881	1.22443	0.999851	0.697447	0.696531
GO:0005229~intracellular calcium activated chloride channel activity	14	0.157215	0.002978	7497	16	16881	1.97024	0.999886	0.697447	0.696531
GO:0016705~oxidoreductase activity, acting on paired donors, with incorporation or reduction of molecular oxygen	37	0.415497	0.003319	7497	57	16881	1.46163	0.99996	0.719537	0.718592
GO:0003777~microtubule motor activity	49	0.550253	0.003545	7497	80	16881	1.37917	0.99998	0.719537	0.718592
GO:0005215~transporter activity	110	1.23526	0.0038	7497	202	16881	1.22617	0.999991	0.723206	0.722256
GO:0003341~cilium movement	22	0.247052	0.000426	7453	27	16792	1.83582	0.975668	0.928682	0.928682
GO:0016712~oxidoreductase activity, acting on paired donors, with incorporation or reduction of molecular oxygen, reduced flavin or flavoprotein as one donor, and incorporation of one atom of oxygen	13	0.145985	0.005526	7497	15	16881	1.95147	1	0.960114	0.958853
GO:0001085~RNA polymerase II transcription factor binding	31	0.348119	0.005676	7497	47	16881	1.48516	1	0.960114	0.958853
GO:0005003~ephrin receptor activity	10	0.112296	0.013342	7497	11	16881	2.047	1	1	0.999014
GO:0043225~anion transmembrane-transporting ATPase activity	10	0.112296	0.013342	7497	11	16881	2.047	1	1	0.999014
GO:0008237~metallopeptidase activity	47	0.527793	0.016594	7497	81	16881	1.30654	1	1	0.999014
GO:0008392~arachidonic acid epoxygenase activity	12	0.134756	0.022755	7497	15	16881	1.80136	1	1	0.999014
GO:0050840~extracellular matrix binding	18	0.202134	0.025352	7497	26	16881	1.55887	1	1	0.999014
GO:0022857~transmembrane transporter activity	30	0.336889	0.026466	7497	49	16881	1.37859	1	1	0.999014
GO:0008236~serine-type peptidase activity	37	0.415497	0.028334	7497	63	16881	1.32243	1	1	0.999014
GO:0017154~semaphorin receptor activity	10	0.112296	0.03235	7497	12	16881	1.87642	1	1	0.999014
GO:0005516~calmodulin binding	98	1.10051	0.032391	7497	189	16881	1.16755	1	1	0.999014
GO:1990247~N6-methyladenosine-containing RNA binding	7	0.078608	0.033211	7497	7	16881	2.2517	1	1	0.999014
GO:0000405~bubble DNA binding	7	0.078608	0.033211	7497	7	16881	2.2517	1	1	0.999014
GO:0015101~organic cation transmembrane transporter activity	7	0.078608	0.033211	7497	7	16881	2.2517	1	1	0.999014
GO:0005021~vascular endothelial growth factor-activated receptor activity	7	0.078608	0.033211	7497	7	16881	2.2517	1	1	0.999014
GO:0004714~transmembrane receptor protein tyrosine kinase	24	0.269512	0.033324	7497	38	16881	1.42213	1	1	0.999014
GO:0005452~inorganic anion exchanger activity	15	0.168445	0.033448	7497	21	16881	1.60836	1	1	0.999014
GO:0008233~peptidase activity	50	0.561482	0.035107	7497	90	16881	1.25094	1	1	0.999014
GO:0045296~cadherin binding	16	0.179674	0.036155	7497	23	16881	1.5664	1	1	0.999014
GO:0005540~hyaluronic acid binding	16	0.179674	0.036155	7497	23	16881	1.5664	1	1	0.999014
GO:0015301~anion:anion antiporter activity	16	0.179674	0.036155	7497	23	16881	1.5664	1	1	0.999014
GO:0003810~protein-glutamine gamma-glutamyltransferase activity	8	0.089837	0.04607	7497	9	16881	2.00151	1	1	0.999014
GO:0016887~ATPase activity	94	1.05559	0.046706	7497	183	16881	1.15661	1	1	0.999014
GO:0016874~ligase activity	135	1.516	0.046773	7497	270	16881	1.12585	1	1	0.999014
GO:0005248~voltage-gated sodium channel activity	14	0.157215	0.051893	7497	20	16881	1.57619	1	1	0.999014
GO:0001530~lipopolysaccharide binding	15	0.168445	0.054938	7497	22	16881	1.53525	1	1	0.999014
GO:0005031~tumor necrosis factor-activated receptor activity	16	0.179674	0.057459	7497	24	16881	1.50113	1	1	0.999014
GO:0000977~RNA polymerase II regulatory region sequence-specific DNA binding	105	1.17911	0.059242	7497	208	16881	1.13668	1	1	0.999014
GO:0008395~steroid hydroxylase activity	17	0.190904	0.059536	7497	26	16881	1.47227	1	1	0.999014
GO:0000287~magnesium ion binding	103	1.15665	0.061224	7497	204	16881	1.13689	1	1	0.999014
GO:0008139~nuclear localization sequence binding	18	0.202134	0.061235	7497	28	16881	1.44752	1	1	0.999014
GO:0002020~protease binding	54	0.606401	0.062572	7497	101	16881	1.20388	1	1	0.999014
GO:0004553~hydrolase activity, hydrolyzing O-glycosyl compounds	19	0.213363	0.062611	7497	30	16881	1.42608	1	1	0.999014
GO:0005227~calcium activated cation channel activity	10	0.112296	0.064066	7497	13	16881	1.73208	1	1	0.999014
GO:0008143~poly(A) binding	10	0.112296	0.064066	7497	13	16881	1.73208	1	1	0.999014
GO:0004035~alkaline phosphatase activity	6	0.067378	0.065222	7497	6	16881	2.2517	1	1	0.999014
GO:0008201~heparin binding	82	0.920831	0.065727	7497	160	16881	1.154	1	1	0.999014
GO:0004866~endopeptidase inhibitor activity	24	0.269512	0.066034	7497	40	16881	1.35102	1	1	0.999014
GO:0004386~helicase activity	46	0.516564	0.070043	7497	85	16881	1.21857	1	1	0.999014
GO:0015106~bicarbonate transmembrane transporter activity	11	0.123526	0.070254	7497	15	16881	1.65125	1	1	0.999014
GO:0070063~RNA polymerase binding	11	0.123526	0.070254	7497	15	16881	1.65125	1	1	0.999014
GO:0005089~Rho guanyl-nucleotide exchange factor activity	42	0.471645	0.073916	7497	77	16881	1.2282	1	1	0.999014
GO:0004950~chemokine receptor activity	12	0.134756	0.075106	7497	17	16881	1.58944	1	1	0.999014
GO:0016787~hydrolase activity	96	1.07805	0.078296	7497	191	16881	1.13175	1	1	0.999014
GO:0004527~exonuclease activity	13	0.145985	0.078906	7497	19	16881	1.54064	1	1	0.999014
GO:0046920~alpha-(1->3)-fucosyltransferase activity	7	0.078608	0.082949	7497	8	16881	1.97024	1	1	0.999014
GO:0036310~annealing helicase activity	7	0.078608	0.082949	7497	8	16881	1.97024	1	1	0.999014
GO:0004622~lysophospholipase activity	16	0.179674	0.085898	7497	25	16881	1.44109	1	1	0.999014
GO:0043236~laminin binding	16	0.179674	0.085898	7497	25	16881	1.44109	1	1	0.999014
GO:0019838~growth factor binding	17	0.190904	0.087192	7497	27	16881	1.41774	1	1	0.999014
GO:0051879~Hsp90 protein binding	17	0.190904	0.087192	7497	27	16881	1.41774	1	1	0.999014
GO:0005216~ion channel activity	25	0.280741	0.088278	7497	43	16881	1.30913	1	1	0.999014
GO:0031624~ubiquitin conjugating enzyme binding	19	0.213363	0.088735	7497	31	16881	1.38007	1	1	0.999014
GO:0003700~transcription factor activity, sequence-specific DNA binding	448	5.03088	0.092382	7497	961	16881	1.0497	1	1	0.999014
GO:0015299~solute:proton antiporter activity	8	0.089837	0.095185	7497	10	16881	1.80136	1	1	0.999014
GO:0008409~5'-3' exonuclease activity	8	0.089837	0.095185	7497	10	16881	1.80136	1	1	0.999014
GO:0005262~calcium channel activity	38	0.426727	0.096174	7497	70	16881	1.22235	1	1	0.999014
GO:0098656~anion transmembrane transport	23	0.258282	0.001246	7453	30	16792	1.72734	0.999981	1	1
GO:0035082~axoneme assembly	15	0.168445	0.001574	7453	17	16792	1.98799	0.999999	1	1
GO:0006396~RNA processing	58	0.651319	0.003	7453	97	16792	1.34719	1	1	1
GO:0030449~regulation of complement activation	22	0.247052	0.004069	7453	30	16792	1.65224	1	1	1
GO:0019373~epoxygenase P450 pathway	15	0.168445	0.004182	7453	18	16792	1.87754	1	1	1
GO:0043046~DNA methylation involved in gamete generation	15	0.168445	0.004182	7453	18	16792	1.87754	1	1	1
GO:0006631~fatty acid process	34	0.381808	0.00429	7453	52	16792	1.47315	1	1	1
GO:0015701~bicarbonate transport	29	0.32566	0.007818	7453	44	16792	1.48497	1	1	1
GO:0035725~sodium ion transmembrane transport	44	0.494104	0.008714	7453	73	16792	1.358	1	1	1
GO:0007018~microtubule-based movement	48	0.539023	0.009188	7453	81	16792	1.33514	1	1	1
GO:0006027~glycosaminoglycan catabolic process	19	0.213363	0.00924	7453	26	16792	1.64646	1	1	1
GO:0007588~excretion	25	0.280741	0.009611	7453	37	16792	1.52233	1	1	1
GO:0050910~detection of mechanical stimulus involved in sensory perception of sound	12	0.134756	0.010066	7453	14	16792	1.93119	1	1	1
GO:0048240~sperm capacitation	13	0.145985	0.013099	7453	16	16792	1.83061	1	1	1
GO:0045494~photoreceptor cell maintenance	23	0.258282	0.013509	7453	34	16792	1.52412	1	1	1
GO:0051453~regulation of intracellular pH	24	0.269512	0.014401	7453	36	16792	1.50204	1	1	1
GO:0019369~arachidonic acid metabolic process	18	0.202134	0.014761	7453	25	16792	1.6222	1	1	1
GO:0060612~adipose tissue development	18	0.202134	0.014761	7453	25	16792	1.6222	1	1	1
GO:0070588~calcium ion transmembrane transport	66	0.741157	0.015482	7453	119	16792	1.24959	1	1	1
GO:0007597~blood coagulation, intrinsic pathway	14	0.157215	0.015965	7453	18	16792	1.75237	1	1	1
GO:0007286~spermatid development	45	0.505334	0.016272	7453	77	16792	1.31672	1	1	1
GO:0006814~sodium ion transport	47	0.527793	0.016393	7453	81	16792	1.30733	1	1	1
GO:0036159~inner dynein arm assembly	11	0.123526	0.018166	7453	13	16792	1.90643	1	1	1
GO:0046427~positive regulation of JAK-STAT cascade	16	0.179674	0.021038	7453	22	16792	1.63858	1	1	1
GO:0007169~transmembrane receptor protein tyrosine kinase signaling pathway	54	0.606401	0.021054	7453	96	16792	1.26734	1	1	1
GO:0008152~metabolic process	89	0.999439	0.021978	7453	168	16792	1.19358	1	1	1
GO:0036158~outer dynein arm assembly	12	0.134756	0.022641	7453	15	16792	1.80244	1	1	1
GO:0015695~organic cation transport	12	0.134756	0.022641	7453	15	16792	1.80244	1	1	1
GO:0035556~intracellular signal transduction	200	2.24593	0.023262	7453	403	16792	1.11814	1	1	1
GO:0046415~urate metabolic process	9	0.101067	0.02492	7453	10	16792	2.02775	1	1	1
GO:0000732~strand displacement	18	0.202134	0.025188	7453	26	16792	1.55981	1	1	1
GO:0070509~calcium ion import	13	0.145985	0.026643	7453	17	16792	1.72292	1	1	1
GO:0050908~detection of light stimulus involved in visual perception	13	0.145985	0.026643	7453	17	16792	1.72292	1	1	1
GO:0086010~membrane depolarization during action potential	19	0.213363	0.02694	7453	28	16792	1.52886	1	1	1
GO:0007616~long-term memory	19	0.213363	0.02694	7453	28	16792	1.52886	1	1	1
GO:0006919~activation of cysteine-type endopeptidase activity involved in apoptotic process	47	0.527793	0.027844	7453	83	16792	1.27582	1	1	1
GO:0014068~positive regulation of phosphatidylinositol 3-kinase signaling	38	0.426727	0.028149	7453	65	16792	1.31717	1	1	1
GO:0050900~leukocyte migration	66	0.741157	0.029439	7453	122	16792	1.21886	1	1	1
GO:0010765~positive regulation of sodium ion transport	14	0.157215	0.030173	7453	19	16792	1.66014	1	1	1
GO:1902287~semaphorin-plexin signaling pathway involved in axon guidance	10	0.112296	0.032213	7453	12	16792	1.87754	1	1	1
GO:0015711~organic anion transport	10	0.112296	0.032213	7453	12	16792	1.87754	1	1	1
GO:0043931~ossification involved in bone maturation	7	0.078608	0.033104	7453	7	16792	2.25305	1	1	1
GO:0042730~fibrinolysis	15	0.168445	0.033262	7453	21	16792	1.60932	1	1	1
GO:0007157~heterophilic cell-cell adhesion via plasma membrane cell adhesion molecules	30	0.336889	0.036418	7453	50	16792	1.35183	1	1	1
GO:0034612~response to tumor necrosis factor	17	0.190904	0.038272	7453	25	16792	1.53208	1	1	1
GO:0006820~anion transport	11	0.123526	0.038417	7453	14	16792	1.77026	1	1	1
GO:0001675~acrosome assembly	11	0.123526	0.038417	7453	14	16792	1.77026	1	1	1
GO:0060271~cilium morphogenesis	72	0.808535	0.039735	7453	136	16792	1.19279	1	1	1
GO:0017144~drug metabolic process	18	0.202134	0.040276	7453	27	16792	1.50204	1	1	1
GO:0007062~sister chromatid cohesion	56	0.62886	0.040575	7453	103	16792	1.22496	1	1	1
GO:0016337~single organismal cell-cell adhesion	55	0.617631	0.041052	7453	101	16792	1.22691	1	1	1
GO:0035162~embryonic hemopoiesis	12	0.134756	0.043635	7453	16	16792	1.68979	1	1	1
GO:0015698~inorganic anion transport	12	0.134756	0.043635	7453	16	16792	1.68979	1	1	1
GO:0006349~regulation of gene expression by genetic imprinting	12	0.134756	0.043635	7453	16	16792	1.68979	1	1	1
GO:0060340~positive regulation of type I interferon-mediated signaling pathway	8	0.089837	0.045911	7453	9	16792	2.00271	1	1	1
GO:0021675~nerve development	8	0.089837	0.045911	7453	9	16792	2.00271	1	1	1
GO:0021785~branchiomotor neuron axon guidance	8	0.089837	0.045911	7453	9	16792	2.00271	1	1	1
GO:0000733~DNA strand renaturation	8	0.089837	0.045911	7453	9	16792	2.00271	1	1	1
GO:0007289~spermatid nucleus differentiation	8	0.089837	0.045911	7453	9	16792	2.00271	1	1	1
GO:0006605~protein targeting	24	0.269512	0.047357	7453	39	16792	1.38649	1	1	1
GO:0030705~cytoskeleton-dependent intracellular transport	13	0.145985	0.047998	7453	18	16792	1.62721	1	1	1
GO:0036297~interstrand cross-link repair	29	0.32566	0.049202	7453	49	16792	1.33344	1	1	1
GO:0006810~transport	171	1.92027	0.05053	7453	348	16792	1.1071	1	1	1
GO:0006406~mRNA export from nucleus	54	0.606401	0.05096	7453	100	16792	1.21665	1	1	1
GO:0016567~protein ubiquitination	176	1.97642	0.051791	7453	359	16792	1.10456	1	1	1
GO:0007160~cell-matrix adhesion	49	0.550253	0.054324	7453	90	16792	1.22666	1	1	1
GO:0010165~response to X-ray	15	0.168445	0.054654	7453	22	16792	1.53617	1	1	1
GO:0043687~post-translational protein modification	15	0.168445	0.054654	7453	22	16792	1.53617	1	1	1
GO:0009312~oligosaccharide biosynthetic process	9	0.101067	0.055961	7453	11	16792	1.84341	1	1	1
GO:0036065~fucosylation	9	0.101067	0.055961	7453	11	16792	1.84341	1	1	1
GO:0002523~leukocyte migration involved in inflammatory response	9	0.101067	0.055961	7453	11	16792	1.84341	1	1	1
GO:0055085~transmembrane transport	122	1.37002	0.056709	7453	244	16792	1.12653	1	1	1
GO:0051930~regulation of sensory perception of pain	17	0.190904	0.059207	7453	26	16792	1.47315	1	1	1
GO:0016339~calcium-dependent cell-cell adhesion via plasma membrane cell adhesion molecules	18	0.202134	0.060886	7453	28	16792	1.44839	1	1	1
GO:0019228~neuronal action potential	18	0.202134	0.060886	7453	28	16792	1.44839	1	1	1
GO:0060079~excitatory postsynaptic potential	18	0.202134	0.060886	7453	28	16792	1.44839	1	1	1
GO:0035666~TRIF-dependent toll-like receptor signaling pathway	18	0.202134	0.060886	7453	28	16792	1.44839	1	1	1
GO:0042384~cilium assembly	65	0.729927	0.062554	7453	124	16792	1.18104	1	1	1
GO:0046677~response to antibiotic	20	0.224593	0.063327	7453	32	16792	1.40816	1	1	1
GO:0070830~bicellular tight junction assembly	20	0.224593	0.063327	7453	32	16792	1.40816	1	1	1
GO:2000484~positive regulation of interleukin-8 secretion	10	0.112296	0.063818	7453	13	16792	1.73312	1	1	1
GO:0032026~response to magnesium ion	10	0.112296	0.063818	7453	13	16792	1.73312	1	1	1
GO:0006957~complement activation, alternative pathway	10	0.112296	0.063818	7453	13	16792	1.73312	1	1	1
GO:0009804~coumarin metabolic process	6	0.067378	0.065049	7453	6	16792	2.25305	1	1	1
GO:0000480~endonucleolytic cleavage in 5'-ETS of tricistronic rRNA transcript (SSU-rRNA, 5.8S rRNA, LSU-rRNA)	6	0.067378	0.065049	7453	6	16792	2.25305	1	1	1
GO:0072673~lamellipodium morphogenesis	6	0.067378	0.065049	7453	6	16792	2.25305	1	1	1
GO:2000021~regulation of ion homeostasis	6	0.067378	0.065049	7453	6	16792	2.25305	1	1	1
GO:0060291~long-term synaptic potentiation	23	0.258282	0.065281	7453	38	16792	1.36369	1	1	1
GO:0010977~negative regulation of neuron projection development	26	0.291971	0.065837	7453	44	16792	1.33135	1	1	1
GO:0006635~fatty acid beta-oxidation	26	0.291971	0.065837	7453	44	16792	1.33135	1	1	1
GO:0032270~positive regulation of cellular protein metabolic	11	0.123526	0.069968	7453	15	16792	1.65224	1	1	1
GO:0051974~negative regulation of telomerase activity	11	0.123526	0.069968	7453	15	16792	1.65224	1	1	1
GO:0006309~apoptotic DNA fragmentation	11	0.123526	0.069968	7453	15	16792	1.65224	1	1	1
GO:0045582~positive regulation of T cell differentiation	11	0.123526	0.069968	7453	15	16792	1.65224	1	1	1
GO:0034587~piRNA metabolic process	11	0.123526	0.069968	7453	15	16792	1.65224	1	1	1
GO:0035640~exploration behavior	11	0.123526	0.069968	7453	15	16792	1.65224	1	1	1
GO:0007596~blood coagulation	93	1.04436	0.071275	7453	184	16792	1.13877	1	1	1
GO:0090305~nucleic acid phosphodiester bond hydrolysis	41	0.460415	0.074225	7453	75	16792	1.23167	1	1	1
GO:0042391~regulation of membrane potential	41	0.460415	0.074225	7453	75	16792	1.23167	1	1	1
114500~Colorectal cancer, somatic	10	0.112296	0.074703	1692	16	4740	1.75089	1	1	1
GO:0006376~mRNA splice site selection	12	0.134756	0.074786	7453	17	16792	1.59039	1	1	1
GO:0006855~drug transmembrane transport	13	0.145985	0.078555	7453	19	16792	1.54156	1	1	1
GO:0046716~muscle cell cellular homeostasis	13	0.145985	0.078555	7453	19	16792	1.54156	1	1	1
GO:1904659~glucose transmembrane transport	13	0.145985	0.078555	7453	19	16792	1.54156	1	1	1
GO:0018108~peptidyl-tyrosine phosphorylation	78	0.875912	0.080181	7453	153	16792	1.14861	1	1	1
GO:0007129~synapsis	14	0.157215	0.081489	7453	21	16792	1.50204	1	1	1
GO:0001676~long-chain fatty acid metabolic process	14	0.157215	0.081489	7453	21	16792	1.50204	1	1	1
GO:0045987~positive regulation of smooth muscle contraction	14	0.157215	0.081489	7453	21	16792	1.50204	1	1	1
GO:0006690~icosanoid metabolic process	7	0.078608	0.08271	7453	8	16792	1.97142	1	1	1
GO:0002221~pattern recognition receptor signaling pathway	7	0.078608	0.08271	7453	8	16792	1.97142	1	1	1
GO:0010457~centriole-centriole cohesion	7	0.078608	0.08271	7453	8	16792	1.97142	1	1	1
GO:1900246~positive regulation of RIG-I signaling pathway	7	0.078608	0.08271	7453	8	16792	1.97142	1	1	1
GO:0035590~purinergic nucleotide receptor signaling pathway	7	0.078608	0.08271	7453	8	16792	1.97142	1	1	1
GO:0035924~cellular response to vascular endothelial growth factor stimulus	15	0.168445	0.083753	7453	23	16792	1.46938	1	1	1
GO:0043044~ATP-dependent chromatin remodeling	15	0.168445	0.083753	7453	23	16792	1.46938	1	1	1
GO:0043252~sodium-independent organic anion transport	15	0.168445	0.083753	7453	23	16792	1.46938	1	1	1
GO:0019722~calcium-mediated signaling	29	0.32566	0.08516	7453	51	16792	1.28115	1	1	1
GO:0075733~intracellular transport of virus	29	0.32566	0.08516	7453	51	16792	1.28115	1	1	1
GO:0010212~response to ionizing radiation	28	0.31443	0.085892	7453	49	16792	1.28746	1	1	1
GO:0006687~glycosphingolipid metabolic process	26	0.291971	0.087178	7453	45	16792	1.30176	1	1	1
GO:0030203~glycosaminoglycan metabolic process	18	0.202134	0.087648	7453	29	16792	1.39845	1	1	1
GO:0048008~platelet-derived growth factor receptor signaling pathway	18	0.202134	0.087648	7453	29	16792	1.39845	1	1	1
GO:0030155~regulation of cell adhesion	25	0.280741	0.087708	7453	43	16792	1.30991	1	1	1
GO:0042060~wound healing	43	0.482875	0.088419	7453	80	16792	1.21102	1	1	1
GO:0010827~regulation of glucose transport	20	0.224593	0.088593	7453	33	16792	1.36549	1	1	1
GO:0071526~semaphorin-plexin signaling pathway	20	0.224593	0.088593	7453	33	16792	1.36549	1	1	1
GO:0030030~cell projection organization	20	0.224593	0.088593	7453	33	16792	1.36549	1	1	1
GO:0071364~cellular response to epidermal growth factor stimulus	20	0.224593	0.088593	7453	33	16792	1.36549	1	1	1
GO:0015758~glucose transport	20	0.224593	0.088593	7453	33	16792	1.36549	1	1	1
GO:0030216~keratinocyte differentiation	41	0.460415	0.091171	7453	76	16792	1.21546	1	1	1
GO:0007601~visual perception	100	1.12296	0.092308	7453	201	16792	1.12092	1	1	1
GO:0010761~fibroblast migration	8	0.089837	0.09489	7453	10	16792	1.80244	1	1	1
GO:0070286~axonemal dynein complex assembly	8	0.089837	0.09489	7453	10	16792	1.80244	1	1	1
GO:0002218~activation of innate immune response	8	0.089837	0.09489	7453	10	16792	1.80244	1	1	1
GO:0043066~negative regulation of apoptotic process	217	2.43683	0.097141	7453	455	16792	1.07453	1	1	1
GO:0007200~phospholipase C-activating G-protein coupled receptor signaling pathway	36	0.404267	0.098276	7453	66	16792	1.22894	1	1	1
GO:0010521~telomerase inhibitor activity	8	0.089837	0.016632	8	16881	2.2517	1	1	0.999014	0.999014
