# Supplementary material for: Chikungunya virus time course infection of human macrophages reveals intracellular signaling pathways relevant to repurposed therapeutics
Source: PeerJ. 2022 Mar 21;10:e13090. doi: 10.7717/peerj.13090 (PMC8944338; doi:10.7717/peerj.13090)
Supplement: Supplemental Information 3 [file peerj-10-13090-s003.xlsx]

## Sheet: Pathways at 48hpi
Name	pSize	NDE	pNDE	tA	pPERT	pG	pGFdr	pGFWER	Status	SourceDB
Stimuli-sensing channels	100	76	0.00813993	119.879	2e-06	3.08232e-07	0.000123376	0.000270628	Activated	Reactome
Wnt signaling pathway	219	139	0.630644	202.821	2e-06	1.83938e-05	0.000294302	0.000294302	Activated	Panther
ECM-receptor interaction	79	58	0.054978	-183.77	2e-06	1.8718e-06	0.000331309	0.000331309	Inhibited	KEGG
IGF1 pathway	30	22	0.201277	291.863	2e-06	6.33034e-06	0.000261305	0.000974873	Activated	NCI
Role of Calcineurin-dependent NFAT signaling in lymphocytes	36	26	0.20807	3786.46	2e-06	6.53018e-06	0.000261305	0.00100565	Activated	NCI
Stabilization and expansion of the E-cadherin adherens junction	42	30	0.212304	1660.19	2e-06	6.6545e-06	0.000261305	0.00102479	Activated	NCI
HIF-1-alpha transcription factor network	64	44	0.272316	118.36	2e-06	8.39994e-06	0.000261305	0.00129359	Activated	NCI
ATF-2 transcription factor network	58	40	0.275228	175.997	2e-06	8.48391e-06	0.000261305	0.00130652	Activated	NCI
regulation of eif-4e and p70s6 kinase	21	15	0.331709	136.38	2e-06	1.01011e-05	0.000914644	0.00173739	Activated	BioCarta
S1P2 pathway	14	10	0.40099	131.625	2e-06	1.20587e-05	0.000289713	0.00185704	Activated	NCI
Influenza A	106	70	0.395747	297.515	2e-06	1.19115e-05	0.000410145	0.00210833	Activated	KEGG
Generic Transcription Pathway	806	538	0.0732294	1110.08	2e-06	2.45121e-06	0.000123376	0.00215216	Activated	Reactome
Salmonella infection	71	47	0.42106	193.569	2e-06	1.26211e-05	0.000410145	0.00223394	Activated	KEGG
VEGFR3 signaling in lymphatic endothelium	24	16	0.496596	155.38	2e-06	1.47214e-05	0.000289713	0.0022671	Activated	NCI
eukaryotic protein translation	13	9	0.478921	181.98	2e-06	1.42322e-05	0.000914644	0.00244793	Activated	BioCarta
pten dependent cell cycle arrest and apoptosis	15	10	0.54129	286.54	2e-06	1.59531e-05	0.000914644	0.00274393	Activated	BioCarta
Olfactory transduction	357	229	0.548164	-1064.26	2e-06	1.61418e-05	0.000410145	0.00285711	Inhibited	KEGG
Downregulation of ERBB2 signaling	27	21	0.100741	1525.04	2e-06	3.30784e-06	0.000123376	0.00290429	Activated	Reactome
Fc epsilon RI signaling pathway	59	37	0.655829	443.15	2e-06	1.9077e-05	0.000410145	0.00337663	Activated	KEGG
Pathogenic Escherichia coli infection	40	25	0.660992	369.43	2e-06	1.92169e-05	0.000410145	0.00340139	Activated	KEGG
Regulation of Telomerase	68	41	0.794109	-264.321	2e-06	2.27955e-05	0.000289713	0.00351051	Inhibited	NCI
CDC42 signaling events	62	37	0.814789	716.401	2e-06	2.33473e-05	0.000289713	0.00359548	Activated	NCI
Validated targets of C-MYC transcriptional activation	77	46	0.830594	128.656	2e-06	2.37682e-05	0.000289713	0.00366031	Activated	NCI
N-cadherin signaling events	31	17	0.899553	1615.86	2e-06	2.55981e-05	0.000289713	0.00394211	Activated	NCI
p53 pathway	47	26	0.923171	554.181	2e-06	2.62223e-05	0.000289713	0.00403824	Activated	NCI
Regulation of autophagy	19	11	0.796437	149.6	2e-06	2.28577e-05	0.000410145	0.00404581	Activated	KEGG
Renal cell carcinoma	57	34	0.809205	196.837	2e-06	2.31984e-05	0.000410145	0.00410611	Activated	KEGG
Signaling events mediated by VEGFR1 and VEGFR2	65	34	0.982907	1089.88	2e-06	2.77958e-05	0.000289713	0.00428056	Activated	NCI
EPHB-mediated forward signaling	41	30	0.152639	554.008	2e-06	4.88509e-06	0.000123376	0.00428911	Activated	Reactome
IFN-gamma pathway	34	15	0.99503	308.832	2e-06	2.81143e-05	0.000289713	0.0043296	Activated	NCI
PDGFR-beta signaling pathway	104	52	0.99901	1838.39	2e-06	2.82188e-05	0.000289713	0.00434569	Activated	NCI
Chronic myeloid leukemia	73	42	0.907155	329.289	2e-06	2.57991e-05	0.000410145	0.00456645	Activated	KEGG
the information processing pathway at the ifn beta enhancer	22	11	0.945226	127.925	2e-06	2.68041e-05	0.00115258	0.00461031	Activated	BioCarta
Fc gamma R-mediated phagocytosis	92	53	0.925332	458.024	2e-06	2.62794e-05	0.000410145	0.00465145	Activated	KEGG
AGE-RAGE signaling pathway in diabetic complications	90	51	0.946392	420.966	2e-06	2.68349e-05	0.000410145	0.00474977	Activated	KEGG
Ras signaling pathway	222	128	0.98331	780.776	2e-06	2.78064e-05	0.000410145	0.00492174	Activated	KEGG
Circadian Clock	68	47	0.242627	358.391	2e-06	7.54016e-06	0.000123376	0.00662026	Activated	Reactome
Signaling by ERBB2	44	31	0.245909	517.301	2e-06	7.63556e-06	0.000123376	0.00670403	Activated	Reactome
Integrin signalling pathway	110	85	0.00231153	-124.405	0.0168	0.000433238	0.0034659	0.0069318	Inhibited	Panther
Costimulation by the CD28 family	57	39	0.307823	956.518	2e-06	9.41975e-06	0.000123376	0.00827054	Activated	Reactome
BMAL1:CLOCK,NPAS2 activates circadian gene expression	45	31	0.317127	148.375	2e-06	9.68557e-06	0.000123376	0.00850393	Activated	Reactome
Activation of gene expression by SREBF (SREBP)	36	25	0.323807	131.735	2e-06	9.87609e-06	0.000123376	0.00867121	Activated	Reactome
Regulation of TP53 Activity through Acetylation	30	21	0.327773	87.0543	2e-06	9.98907e-06	0.000123376	0.0087704	Activated	Reactome
Deactivation of the beta-catenin transactivating complex	41	28	0.360489	153.641	2e-06	1.09175e-05	0.000123376	0.0095856	Activated	Reactome
Deadenylation of mRNA	23	16	0.386081	118.985	2e-06	1.16396e-05	0.000123376	0.0102196	Activated	Reactome
MAP2K and MAPK activation	37	25	0.409918	-63.975	2e-06	1.23091e-05	0.000123376	0.0108074	Inhibited	Reactome
N-glycan trimming in the ER and Calnexin/Calreticulin cycle	34	23	0.416068	486.019	2e-06	1.24814e-05	0.000123376	0.0109587	Activated	Reactome
Toll Like Receptor 3 (TLR3) Cascade	93	61	0.443335	908.848	2e-06	1.32431e-05	0.000123376	0.0116275	Activated	Reactome
Signaling by FGFR1	41	27	0.488281	403.107	2e-06	1.44914e-05	0.000123376	0.0127235	Activated	Reactome
Nuclear Envelope Reassembly	10	7	0.494764	58.25	2e-06	1.46708e-05	0.000123376	0.012881	Activated	Reactome
Activated TLR4 signalling	108	70	0.499038	839.464	2e-06	1.47889e-05	0.000123376	0.0129847	Activated	Reactome
Deadenylation-dependent mRNA decay	54	35	0.530333	152.21	2e-06	1.56518e-05	0.000123376	0.0137423	Activated	Reactome
Toll-Like Receptors Cascades	143	92	0.534285	939.594	2e-06	1.57606e-05	0.000123376	0.0138378	Activated	Reactome
PKB-mediated events	40	26	0.535015	221.587	2e-06	1.57806e-05	0.000123376	0.0138554	Activated	Reactome
Constitutive Signaling by NOTCH1 HD Domain Mutants	15	10	0.54129	1696.52	2e-06	1.59531e-05	0.000123376	0.0140068	Activated	Reactome
Signaling by NOTCH1 HD Domain Mutants in Cancer	15	10	0.54129	1706.66	2e-06	1.59531e-05	0.000123376	0.0140068	Activated	Reactome
Toll Like Receptor 4 (TLR4) Cascade	119	76	0.580465	878.115	2e-06	1.70265e-05	0.000123376	0.0149493	Activated	Reactome
mTOR signalling	39	25	0.582256	225.411	2e-06	1.70755e-05	0.000123376	0.0149923	Activated	Reactome
Regulation of cholesterol biosynthesis by SREBP (SREBF)	49	31	0.622743	157.37	2e-06	1.81791e-05	0.000123376	0.0159612	Activated	Reactome
RHO GTPases activate PAKs	24	15	0.660249	83.2958	2e-06	1.91967e-05	0.000123376	0.0168547	Activated	Reactome
DNA Damage Recognition in GG-NER	37	23	0.675606	158.24	2e-06	1.96122e-05	0.000123376	0.0172195	Activated	Reactome
CTLA4 inhibitory signaling	21	13	0.681809	238.736	2e-06	1.97798e-05	0.000123376	0.0173667	Activated	Reactome
AKT phosphorylates targets in the nucleus	8	5	0.691237	32.385	2e-06	2.00343e-05	0.000123376	0.0175901	Activated	Reactome
Signaling by NOTCH2	31	19	0.708526	402.874	2e-06	2.05004e-05	0.000123376	0.0179993	Activated	Reactome
Gastrin-CREB signalling pathway via PKC and MAPK	390	246	0.713933	2015.6	2e-06	2.0646e-05	0.000123376	0.0181272	Activated	Reactome
Transport of Mature Transcript to Cytoplasm	76	47	0.717303	6557.21	2e-06	2.07367e-05	0.000123376	0.0182068	Activated	Reactome
PI3K Cascade	70	43	0.736825	231.727	2e-06	2.12615e-05	0.000123376	0.0186676	Activated	Reactome
Signaling by Interleukins	385	241	0.776116	1888.95	2e-06	2.23146e-05	0.000123376	0.0195922	Activated	Reactome
Signaling by GPCR	1133	717	0.778766	2599.45	2e-06	2.23855e-05	0.000123376	0.0196545	Activated	Reactome
RAF activation	24	14	0.796535	344.646	2e-06	2.28603e-05	0.000123376	0.0200714	Activated	Reactome
MAP kinase activation in TLR cascade	60	36	0.798002	353.555	2e-06	2.28995e-05	0.000123376	0.0201058	Activated	Reactome
TGF-beta receptor signaling activates SMADs	31	18	0.820006	8901.53	2e-06	2.34863e-05	0.000123376	0.020621	Activated	Reactome
ERK/MAPK targets	21	12	0.820176	177.545	2e-06	2.34908e-05	0.000123376	0.0206249	Activated	Reactome
VxPx cargo-targeting to cilium	21	12	0.820176	113.645	2e-06	2.34908e-05	0.000123376	0.0206249	Activated	Reactome
Organelle biogenesis and maintenance	322	199	0.841739	566.75	2e-06	2.40647e-05	0.000123376	0.0211288	Activated	Reactome
Toll Like Receptor 2 (TLR2) Cascade	89	53	0.852443	954.468	2e-06	2.43492e-05	0.000123376	0.0213786	Activated	Reactome
Toll Like Receptor TLR1:TLR2 Cascade	89	53	0.852443	947.681	2e-06	2.43492e-05	0.000123376	0.0213786	Activated	Reactome
Negative regulation of MAPK pathway	40	23	0.855889	273.686	2e-06	2.44407e-05	0.000123376	0.021459	Activated	Reactome
HDR through Homologous Recombination (HR) or Single Strand Annealing (SSA)	130	78	0.867829	297.279	2e-06	2.47576e-05	0.000123376	0.0217372	Activated	Reactome
NCAM signaling for neurite out-growth	253	154	0.8867	2021.41	2e-06	2.52578e-05	0.000123376	0.0221764	Activated	Reactome
TRAF6 Mediated Induction of proinflammatory cytokines	69	40	0.888733	1070.26	2e-06	2.53117e-05	0.000123376	0.0222237	Activated	Reactome
Nuclear Events (kinase and transcription factor activation)	24	13	0.892812	276.222	2e-06	2.54197e-05	0.000123376	0.0223185	Activated	Reactome
Toll Like Receptor 9 (TLR9) Cascade	86	50	0.903385	924.707	2e-06	2.56994e-05	0.000123376	0.0225641	Activated	Reactome
Signaling by Hedgehog	122	72	0.904998	5250.12	2e-06	2.57421e-05	0.000123376	0.0226016	Activated	Reactome
ERKs are inactivated	12	6	0.906847	67.95	2e-06	2.5791e-05	0.000123376	0.0226445	Activated	Reactome
Transport to the Golgi and subsequent modification	140	83	0.907454	247.931	2e-06	2.5807e-05	0.000123376	0.0226586	Activated	Reactome
Signalling to ERKs	240	145	0.907632	2004.86	2e-06	2.58117e-05	0.000123376	0.0226627	Activated	Reactome
Energy dependent regulation of mTOR by LKB1-AMPK	28	15	0.914736	143.658	2e-06	2.59995e-05	0.000123376	0.0228276	Activated	Reactome
Signalling to RAS	233	140	0.921195	2022.17	2e-06	2.61701e-05	0.000123376	0.0229774	Activated	Reactome
MAPK targets/ Nuclear events mediated by MAP kinases	30	16	0.923758	277.864	2e-06	2.62378e-05	0.000123376	0.0230368	Activated	Reactome
DNA Double-Strand Break Repair	164	97	0.927446	1060.65	2e-06	2.63352e-05	0.000123376	0.0231223	Activated	Reactome
Signaling by Rho GTPases	410	250	0.928744	6868.86	2e-06	2.63694e-05	0.000123376	0.0231524	Activated	Reactome
RHO GTPase Effectors	282	170	0.929742	6714.03	2e-06	2.63958e-05	0.000123376	0.0231755	Activated	Reactome
DNA Repair	295	178	0.931268	1279.98	2e-06	2.6436e-05	0.000123376	0.0232108	Activated	Reactome
Signalling to p38 via RIT and RIN	226	135	0.933558	1943.36	2e-06	2.64965e-05	0.000123376	0.0232639	Activated	Reactome
Processing of DNA double-strand break ends	98	56	0.9424	286.558	2e-06	2.67297e-05	0.000123376	0.0234686	Activated	Reactome
Frs2-mediated activation	227	135	0.94382	1910.06	2e-06	2.67671e-05	0.000123376	0.0235015	Activated	Reactome
MAPK1/MAPK3 signaling	227	135	0.94382	1921.09	2e-06	2.67671e-05	0.000123376	0.0235015	Activated	Reactome
Pre-NOTCH Transcription and Translation	29	15	0.943827	-64.855	2e-06	2.67673e-05	0.000123376	0.0235017	Inhibited	Reactome
Signaling by ERBB4	311	187	0.945107	1896.63	2e-06	2.6801e-05	0.000123376	0.0235313	Activated	Reactome
Prolonged ERK activation events	229	136	0.947374	1916.11	2e-06	2.68608e-05	0.000123376	0.0235837	Activated	Reactome
ARMS-mediated activation	226	134	0.949503	1938.24	2e-06	2.69168e-05	0.000123376	0.023633	Activated	Reactome
MyD88 dependent cascade initiated on endosome	82	46	0.950828	861.857	2e-06	2.69518e-05	0.000123376	0.0236637	Activated	Reactome
Toll Like Receptor 7/8 (TLR7/8) Cascade	82	46	0.950828	857.762	2e-06	2.69518e-05	0.000123376	0.0236637	Activated	Reactome
Signaling by Leptin	228	135	0.952748	1916.89	2e-06	2.70023e-05	0.000123376	0.0237081	Activated	Reactome
GRB2 events in EGFR signaling	222	131	0.956691	1923.97	2e-06	2.71062e-05	0.000123376	0.0237992	Activated	Reactome
RAF/MAP kinase cascade	222	131	0.956691	1929.15	2e-06	2.71062e-05	0.000123376	0.0237992	Activated	Reactome
SHC1 events in EGFR signaling	222	131	0.956691	1931.05	2e-06	2.71062e-05	0.000123376	0.0237992	Activated	Reactome
SHC1 events in ERBB4 signaling	222	131	0.956691	1927.67	2e-06	2.71062e-05	0.000123376	0.0237992	Activated	Reactome
SOS-mediated signalling	222	131	0.956691	1923.63	2e-06	2.71062e-05	0.000123376	0.0237992	Activated	Reactome
Insulin receptor signalling cascade	274	163	0.957871	2128.91	2e-06	2.71373e-05	0.000123376	0.0238265	Activated	Reactome
IRS-mediated signalling	271	161	0.959476	2156.17	2e-06	2.71795e-05	0.000123376	0.0238636	Activated	Reactome
Signaling by TGF-beta Receptor Complex	71	39	0.960363	8057.89	2e-06	2.72029e-05	0.000123376	0.0238841	Activated	Reactome
Signaling by Type 1 Insulin-like Growth Factor 1 Receptor (IGF1R)	276	164	0.960455	2171.48	2e-06	2.72053e-05	0.000123376	0.0238862	Activated	Reactome
Metalloprotease DUBs	37	19	0.96331	129.455	2e-06	2.72804e-05	0.000123376	0.0239522	Activated	Reactome
Activation of the mRNA upon binding of the cap-binding complex and eIFs, and subsequent binding to 43S	56	30	0.963627	92.3375	2e-06	2.72888e-05	0.000123376	0.0239596	Activated	Reactome
IGF1R signaling cascade	275	163	0.964348	2153.27	2e-06	2.73078e-05	0.000123376	0.0239762	Activated	Reactome
IRS-related events triggered by IGF1R	275	163	0.964348	2147.42	2e-06	2.73078e-05	0.000123376	0.0239762	Activated	Reactome
Signaling by VEGF	314	187	0.965404	2374.33	2e-06	2.73356e-05	0.000123376	0.0240006	Activated	Reactome
Asparagine N-linked glycosylation	264	156	0.966396	663.745	2e-06	2.73617e-05	0.000123376	0.0240235	Activated	Reactome
DARPP-32 events	23	11	0.966744	131.378	2e-06	2.73708e-05	0.000123376	0.0240316	Activated	Reactome
HDMs demethylate histones	46	24	0.967535	116.595	2e-06	2.73916e-05	0.000123376	0.0240498	Activated	Reactome
Interleukin receptor SHC signaling	232	136	0.969304	1911.7	2e-06	2.74382e-05	0.000123376	0.0240907	Activated	Reactome
Eukaryotic Translation Elongation	87	48	0.969328	188.21	2e-06	2.74388e-05	0.000123376	0.0240913	Activated	Reactome
TCR signaling	109	61	0.971347	372.576	2e-06	2.74919e-05	0.000123376	0.0241379	Activated	Reactome
VEGFR2 mediated cell proliferation	234	137	0.971374	1926.31	2e-06	2.74926e-05	0.000123376	0.0241385	Activated	Reactome
Interleukin-2 signaling	239	140	0.971975	1908.22	2e-06	2.75084e-05	0.000123376	0.0241524	Activated	Reactome
Cellular Senescence	190	110	0.972001	1182.16	2e-06	2.75091e-05	0.000123376	0.024153	Activated	Reactome
pre-mRNA splicing	172	99	0.972308	984.793	2e-06	2.75172e-05	0.000123376	0.0241601	Activated	Reactome
RHO GTPases activate PKNs	91	50	0.974561	354.345	2e-06	2.75764e-05	0.000123376	0.0242121	Activated	Reactome
VEGFA-VEGFR2 Pathway	305	180	0.976507	2355.64	2e-06	2.76276e-05	0.000123376	0.024257	Activated	Reactome
Degradation of beta-catenin by the destruction complex	80	43	0.980377	228.802	2e-06	2.77293e-05	0.000123376	0.0243464	Activated	Reactome
Global Genome Nucleotide Excision Repair (GG-NER)	80	43	0.980377	155.551	2e-06	2.77293e-05	0.000123376	0.0243464	Activated	Reactome
TNFR2 non-canonical NF-kB pathway	96	52	0.984393	270.894	2e-06	2.78349e-05	0.000123376	0.024439	Activated	Reactome
PKMTs methylate histone lysines	67	35	0.984522	201.21	2e-06	2.78383e-05	0.000123376	0.024442	Activated	Reactome
Regulation of RAS by GAPs	67	35	0.984522	1733.96	2e-06	2.78383e-05	0.000123376	0.024442	Activated	Reactome
Constitutive Signaling by NOTCH1 HD+PEST Domain Mutants	55	28	0.985342	315.331	2e-06	2.78598e-05	0.000123376	0.0244609	Activated	Reactome
Constitutive Signaling by NOTCH1 PEST Domain Mutants	55	28	0.985342	314.755	2e-06	2.78598e-05	0.000123376	0.0244609	Activated	Reactome
Signaling by NOTCH1 HD+PEST Domain Mutants in Cancer	55	28	0.985342	313.187	2e-06	2.78598e-05	0.000123376	0.0244609	Activated	Reactome
Signaling by NOTCH1 PEST Domain Mutants in Cancer	55	28	0.985342	315.02	2e-06	2.78598e-05	0.000123376	0.0244609	Activated	Reactome
Processing of Capped Intron-Containing Pre-mRNA	226	130	0.98564	3448.73	2e-06	2.78676e-05	0.000123376	0.0244678	Activated	Reactome
Signaling by Insulin receptor	298	174	0.985663	2083.38	2e-06	2.78683e-05	0.000123376	0.0244683	Activated	Reactome
Nonsense-Mediated Decay (NMD)	110	60	0.986486	418.219	2e-06	2.78899e-05	0.000123376	0.0244873	Activated	Reactome
Nonsense Mediated Decay (NMD) enhanced by the Exon Junction Complex (EJC)	110	60	0.986486	417.598	2e-06	2.78899e-05	0.000123376	0.0244873	Activated	Reactome
Interleukin-3, 5 and GM-CSF signaling	248	143	0.987481	1887.73	2e-06	2.7916e-05	0.000123376	0.0245102	Activated	Reactome
mRNA Splicing	179	101	0.988145	967.716	2e-06	2.79334e-05	0.000123376	0.0245256	Activated	Reactome
Adaptive Immune System	682	411	0.988302	188492	2e-06	2.79376e-05	0.000123376	0.0245292	Activated	Reactome
FCERI mediated MAPK activation	242	139	0.988879	3080.52	2e-06	2.79527e-05	0.000123376	0.0245425	Activated	Reactome
DNA Damage/Telomere Stress Induced Senescence	80	42	0.988924	241.023	2e-06	2.79539e-05	0.000123376	0.0245435	Activated	Reactome
MAPK family signaling cascades	265	153	0.988925	2085.85	2e-06	2.7954e-05	0.000123376	0.0245436	Activated	Reactome
Hedgehog ligand biogenesis	63	32	0.990136	878.156	2e-06	2.79858e-05	0.000123376	0.0245715	Activated	Reactome
Nucleotide Excision Repair	106	57	0.990238	205.803	2e-06	2.79884e-05	0.000123376	0.0245739	Activated	Reactome
RET signaling	247	141	0.992291	1873.13	2e-06	2.80423e-05	0.000123376	0.0246212	Activated	Reactome
Cyclin E associated events during G1/S transition	69	35	0.992647	514.224	2e-06	2.80517e-05	0.000123376	0.0246294	Activated	Reactome
Signaling by NOTCH1	69	35	0.992647	895.936	2e-06	2.80517e-05	0.000123376	0.0246294	Activated	Reactome
SCF(Skp2)-mediated degradation of p27/p21	59	29	0.994111	348.507	2e-06	2.80901e-05	0.000123376	0.0246631	Activated	Reactome
The role of GTSE1 in G2/M progression after G2 checkpoint	59	29	0.994111	240.804	2e-06	2.80901e-05	0.000123376	0.0246631	Activated	Reactome
Meiosis	113	60	0.994624	169.405	2e-06	2.81036e-05	0.000123376	0.024675	Activated	Reactome
Fc epsilon receptor (FCERI) signaling	344	199	0.994633	3043.13	2e-06	2.81038e-05	0.000123376	0.0246752	Activated	Reactome
DNA Double Strand Break Response	77	39	0.995013	1186.71	2e-06	2.81138e-05	0.000123376	0.0246839	Activated	Reactome
Host Interactions of HIV factors	115	61	0.995105	404190	2e-06	2.81162e-05	0.000123376	0.0246861	Activated	Reactome
Epigenetic regulation of gene expression	136	73	0.995903	179.93	2e-06	2.81372e-05	0.000123376	0.0247044	Activated	Reactome
RNA Polymerase I Promoter Opening	60	29	0.996155	-282.105	2e-06	2.81438e-05	0.000123376	0.0247102	Inhibited	Reactome
Recruitment and ATM-mediated phosphorylation of repair and signaling proteins at DNA double strand breaks	76	38	0.99627	1169.66	2e-06	2.81468e-05	0.000123376	0.0247129	Activated	Reactome
Autodegradation of Cdh1 by Cdh1:APC/C	62	30	0.996496	479.977	2e-06	2.81528e-05	0.000123376	0.0247181	Activated	Reactome
Hh mutants abrogate ligand secretion	55	26	0.996753	726.075	2e-06	2.81595e-05	0.000123376	0.024724	Activated	Reactome
Hh mutants that don't undergo autocatalytic processing are degraded by ERAD	55	26	0.996753	730.791	2e-06	2.81595e-05	0.000123376	0.024724	Activated	Reactome
Macroautophagy	64	31	0.996808	9597.5	2e-06	2.81609e-05	0.000123376	0.0247253	Activated	Reactome
RNA Polymerase I Promoter Clearance	101	52	0.997019	-222.885	2e-06	2.81665e-05	0.000123376	0.0247302	Inhibited	Reactome
Translation	149	80	0.997076	335.07	2e-06	2.8168e-05	0.000123376	0.0247315	Activated	Reactome
Metabolism of polyamines	82	41	0.997199	246.627	2e-06	2.81712e-05	0.000123376	0.0247343	Activated	Reactome
Innate Immune System	715	425	0.997304	5769.86	2e-06	2.8174e-05	0.000123376	0.0247367	Activated	Reactome
Cyclin A:Cdk2-associated events at S phase entry	68	33	0.99735	372.944	2e-06	2.81752e-05	0.000123376	0.0247378	Activated	Reactome
Regulation of APC/C activators between G1/S and early anaphase	79	39	0.997721	350.721	2e-06	2.81849e-05	0.000123376	0.0247463	Activated	Reactome
RNA Polymerase I, RNA Polymerase III, and Mitochondrial Transcription	138	73	0.997797	-219.035	2e-06	2.81869e-05	0.000123376	0.0247481	Inhibited	Reactome
APC:Cdc20 mediated degradation of cell cycle proteins prior to satisfation of the cell cycle checkpoint	72	35	0.9978	698.288	2e-06	2.8187e-05	0.000123376	0.0247482	Activated	Reactome
Cap-dependent Translation Initiation	114	59	0.997823	130.307	2e-06	2.81876e-05	0.000123376	0.0247487	Activated	Reactome
Eukaryotic Translation Initiation	114	59	0.997823	129.828	2e-06	2.81876e-05	0.000123376	0.0247487	Activated	Reactome
Cell Cycle Checkpoints	199	109	0.997833	12184.7	2e-06	2.81878e-05	0.000123376	0.0247489	Activated	Reactome
APC/C:Cdc20 mediated degradation of mitotic proteins	74	36	0.997995	5846.49	2e-06	2.81921e-05	0.000123376	0.0247527	Activated	Reactome
FCERI mediated NF-kB activation	74	36	0.997995	583.32	2e-06	2.81921e-05	0.000123376	0.0247527	Activated	Reactome
Gene Expression	1654	1009	0.998366	8523.02	2e-06	2.82018e-05	0.000123376	0.0247612	Activated	Reactome
HATs acetylate histones	139	73	0.998402	372.64	2e-06	2.82028e-05	0.000123376	0.024762	Activated	Reactome
Cdc20:Phospho-APC/C mediated degradation of Cyclin A	71	34	0.998424	704.098	2e-06	2.82034e-05	0.000123376	0.0247626	Activated	Reactome
G1/S Transition	115	59	0.998465	571.538	2e-06	2.82044e-05	0.000123376	0.0247635	Activated	Reactome
Activated PKN1 stimulates transcription of AR (androgen receptor) regulated genes KLK2 and KLK3	64	30	0.998553	283.645	2e-06	2.82067e-05	0.000123376	0.0247655	Activated	Reactome
RNA Polymerase I Transcription	103	52	0.998558	-218.94	2e-06	2.82069e-05	0.000123376	0.0247656	Inhibited	Reactome
S Phase	124	64	0.998641	423.78	2e-06	2.82091e-05	0.000123376	0.0247675	Activated	Reactome
Regulation of DNA replication	75	36	0.998686	231.272	2e-06	2.82102e-05	0.000123376	0.0247686	Activated	Reactome
CLEC7A (Dectin-1) signaling	98	49	0.998687	925.704	2e-06	2.82103e-05	0.000123376	0.0247686	Activated	Reactome
Meiotic recombination	84	41	0.99874	139.877	2e-06	2.82117e-05	0.000123376	0.0247698	Activated	Reactome
Amino acid and derivative metabolism	328	185	0.998784	268.775	2e-06	2.82128e-05	0.000123376	0.0247709	Activated	Reactome
ER-Phagosome pathway	77	37	0.998801	206.615	2e-06	2.82132e-05	0.000123376	0.0247712	Activated	Reactome
Orc1 removal from chromatin	70	33	0.998888	208.277	2e-06	2.82156e-05	0.000123376	0.0247733	Activated	Reactome
Switching of origins to a post-replicative state	70	33	0.998888	195.598	2e-06	2.82156e-05	0.000123376	0.0247733	Activated	Reactome
Removal of licensing factors from origins	72	34	0.998983	195.221	2e-06	2.8218e-05	0.000123376	0.0247754	Activated	Reactome
p53-Dependent G1 DNA Damage Response	63	29	0.999006	492.96	2e-06	2.82186e-05	0.000123376	0.024776	Activated	Reactome
p53-Dependent G1/S DNA damage checkpoint	63	29	0.999006	492.191	2e-06	2.82186e-05	0.000123376	0.024776	Activated	Reactome
Vif-mediated degradation of APOBEC3G	52	23	0.999016	367.385	2e-06	2.82189e-05	0.000123376	0.0247762	Activated	Reactome
SCF-beta-TrCP mediated degradation of Emi1	54	24	0.999087	335.134	2e-06	2.82208e-05	0.000123376	0.0247778	Activated	Reactome
Stabilization of p53	54	24	0.999087	494.699	2e-06	2.82208e-05	0.000123376	0.0247778	Activated	Reactome
Senescence-Associated Secretory Phenotype (SASP)	106	53	0.999099	990.673	2e-06	2.82211e-05	0.000123376	0.0247781	Activated	Reactome
Signaling by SCF-KIT	308	172	0.999158	1979.48	2e-06	2.82226e-05	0.000123376	0.0247795	Activated	Reactome
Assembly of the pre-replicative complex	67	31	0.99916	252.908	2e-06	2.82227e-05	0.000123376	0.0247795	Activated	Reactome
CDT1 association with the CDC6:ORC:origin complex	58	26	0.999216	235.87	2e-06	2.82242e-05	0.000123376	0.0247808	Activated	Reactome
APC/C:Cdh1 mediated degradation of Cdc20 and other APC/C:Cdh1 targeted proteins in late mitosis/early G1	71	33	0.999292	491.262	2e-06	2.82261e-05	0.000123376	0.0247825	Activated	Reactome
Activation of anterior HOX genes in hindbrain development during early embryogenesis	119	60	0.999321	13552	2e-06	2.82269e-05	0.000123376	0.0247832	Activated	Reactome
Activation of HOX genes during differentiation	119	60	0.999321	13565.8	2e-06	2.82269e-05	0.000123376	0.0247832	Activated	Reactome
HDACs deacetylate histones	91	44	0.999367	162.935	2e-06	2.82281e-05	0.000123376	0.0247843	Activated	Reactome
Autodegradation of the E3 ubiquitin ligase COP1	51	22	0.99937	218.664	2e-06	2.82282e-05	0.000123376	0.0247844	Activated	Reactome
CDK-mediated phosphorylation and removal of Cdc6	50	21	0.999607	213.853	2e-06	2.82344e-05	0.000123376	0.0247898	Activated	Reactome
Regulation of ornithine decarboxylase (ODC)	50	21	0.999607	213.502	2e-06	2.82344e-05	0.000123376	0.0247898	Activated	Reactome
Antigen processing-Cross presentation	85	40	0.999614	201.88	2e-06	2.82346e-05	0.000123376	0.02479	Activated	Reactome
Mitotic G1-G1/S phases	138	70	0.999617	448.053	2e-06	2.82347e-05	0.000123376	0.02479	Activated	Reactome
G1/S DNA Damage Checkpoints	65	29	0.999619	8679.03	2e-06	2.82347e-05	0.000123376	0.0247901	Activated	Reactome
Oxygen-dependent proline hydroxylation of Hypoxia-inducible Factor Alpha	65	29	0.999619	695.872	2e-06	2.82347e-05	0.000123376	0.0247901	Activated	Reactome
Post-translational protein modification	814	478	0.999665	3843.24	2e-06	2.82359e-05	0.000123376	0.0247912	Activated	Reactome
C-type lectin receptors (CLRs)	120	59	0.999761	942.91	2e-06	2.82385e-05	0.000123376	0.0247934	Activated	Reactome
Cellular response to hypoxia	74	33	0.999828	674.929	2e-06	2.82402e-05	0.000123376	0.0247949	Activated	Reactome
Regulation of Hypoxia-inducible Factor (HIF) by oxygen	74	33	0.999828	676.902	2e-06	2.82402e-05	0.000123376	0.0247949	Activated	Reactome
RAB GEFs exchange GTP for GDP on RABs	87	40	0.999842	427.057	2e-06	2.82406e-05	0.000123376	0.0247952	Activated	Reactome
Ubiquitin-dependent degradation of Cyclin D	50	20	0.999865	214.165	2e-06	2.82412e-05	0.000123376	0.0247958	Activated	Reactome
Ubiquitin-dependent degradation of Cyclin D1	50	20	0.999865	214.56	2e-06	2.82412e-05	0.000123376	0.0247958	Activated	Reactome
NIK-->noncanonical NF-kB signaling	58	24	0.999888	796.416	2e-06	2.82418e-05	0.000123376	0.0247963	Activated	Reactome
MAPK6/MAPK4 signaling	87	39	0.999933	11391.2	2e-06	2.8243e-05	0.000123376	0.0247973	Activated	Reactome
Deubiquitination	284	152	0.999933	504.236	2e-06	2.8243e-05	0.000123376	0.0247973	Activated	Reactome
Dectin-1 mediated noncanonical NF-kB signaling	59	24	0.999935	785.106	2e-06	2.8243e-05	0.000123376	0.0247974	Activated	Reactome
Diseases of signal transduction	310	167	0.999944	1344.45	2e-06	2.82432e-05	0.000123376	0.0247976	Activated	Reactome
Ub-specific processing proteases	210	108	0.999954	364.663	2e-06	2.82435e-05	0.000123376	0.0247978	Activated	Reactome
DNA Replication Pre-Initiation	83	36	0.999968	243.612	2e-06	2.82439e-05	0.000123376	0.0247981	Activated	Reactome
M/G1 Transition	83	36	0.999968	241.973	2e-06	2.82439e-05	0.000123376	0.0247981	Activated	Reactome
UCH proteinases	100	45	0.999974	158.937	2e-06	2.8244e-05	0.000123376	0.0247983	Activated	Reactome
TCF dependent signaling in response to WNT	224	114	0.999987	2285.11	2e-06	2.82444e-05	0.000123376	0.0247986	Activated	Reactome
Signaling by Wnt	312	165	0.999988	3401.93	2e-06	2.82444e-05	0.000123376	0.0247986	Activated	Reactome
